# Supplementary material
Source: PubMed Central journal article supplement (PMC2562210)

## SUPPORTING INFORMATION

### Multicomponent Approach to the Synthesis of Oxidized Amides through Nitrile Hydrozirconation

Shuangyi Wan, Michael E. Green, Jung-Hyun Park, and Paul E. Floreancig\*

Department of Chemistry, University of Pittsburgh, Pittsburgh, PA 15260, USA

**General Experimental** Proton ( $^1\text{H}$  NMR) and carbon ( $^{13}\text{C}$  NMR) nuclear magnetic resonance spectra were recorded on Bruker Avance 300 spectrometer at 300 MHz and 75 MHz or Bruker Avance 500 spectrometer at 500 MHz and 125 MHz if specified. The chemical shifts are given in parts per million (ppm) on the delta ( $\delta$ ) scale. The solvent peak was used as a reference value, for  $^1\text{H}$  NMR:  $\text{CDCl}_3 = 7.27$  ppm,  $\text{CD}_3\text{OD} = 3.31$ , for  $^{13}\text{C}$  NMR:  $\text{CDCl}_3 = 77.23$ ,  $\text{CD}_3\text{OD} = 49.00$ . Data are reported as follows: (s = singlet; d = doublet; t = triplet; q = quartet; sept = septet; sext = sextet; dd = doublet of doublets; ddd = doublet of doublet of doublets; dt = doublet of triplets; td = triplet of doublets; dtd = doublet of triplet of doublets; br = broad). High resolution and low resolution mass spectra were recorded on a VG 7070 spectrometer. Infrared (IR) spectra were collected on a Mattson Cygnus 100 spectrometer. Samples for IR were prepared as a thin film on a NaCl plate by dissolving the compound in  $\text{CH}_2\text{Cl}_2$  and then evaporating the  $\text{CH}_2\text{Cl}_2$ . Optical rotations were measured on a Perkin-Elmer 241 polarimeter at ambient temperature. Tetrahydrofuran and diethyl ether were distilled from sodium and benzophenone. Methylene chloride and benzene was distilled under  $\text{N}_2$  from  $\text{CaH}_2$ . All acid chlorides were freshly distilled prior to use. Analytical TLC was performed on E. Merck pre-coated (25 mm) silica gel 60F-254 plates. Visualization was done under UV (254 nm). Flash chromatography was done using ICN SiliTech 32-63 60 Å silica gel. Reagent grade ethyl acetate, diethyl ether and hexanes (commercial mixture) were purchased from EM Science and used as is for chromatography. All reactions were performed in oven or flame-dried glassware under argon with magnetic stirring unless otherwise noted. All the reactions related to Schwartz reagent were performed under argon unless otherwise specified.

**2-Methoxyoctanenitrile (3)**  
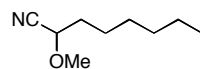  
 $^1\text{H}$  NMR (500 MHz,  $\text{CDCl}_3$ )  $\delta$  4.04 (t,  $J = 6.6$  Hz, 1H), 3.49 (s, 3H), 1.86-1.82 (m, 2H), 1.52-1.46 (m, 2H), 1.37-1.27 (m, 6H), 0.90 (t,  $J = 7.0$  Hz, 3H);  $^{13}\text{C}$  NMR (75 MHz,  $\text{CDCl}_3$ ) 118.4, 70.9, 58.2, 33.6, 31.7, 28.9, 24.9, 22.7, 14.2. The  $^1\text{H}$  NMR spectral data are consistent with those reported in the literature.<sup>1</sup>

**(±)-Phenyl (1*R*,2*R*)-1,2-dimethoxyoctylcarbamate (5) and (±)-phenyl (1*S*,2*R*)-1,2-dimethoxyoctylcarbamate (4)**  
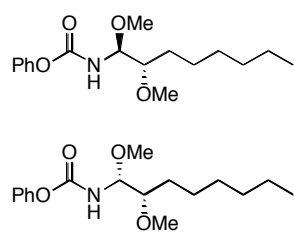  
To a solution of methoxynitrile **4** (70 mg, 0.45 mmol) in  $\text{CH}_2\text{Cl}_2$  (43.5 mL) was added  $\text{Cp}_2\text{Zr}(\text{H})\text{Cl}$  (140 mg, 0.541 mmol). The reaction was stirred for 15 min, then cooled to 0 °C and phenyl chloroformate (79  $\mu\text{L}$ , 0.63 mmol) was added dropwise. The cold bath was removed and the mixture was stirred for 10 min. After that time, the flask was cooled to 0 °C and phenyl chloroformate (56  $\mu\text{L}$ , 0.45 mmol) was added. The mixture was stirred at room temperature for 15 min and then cooled to 0 °C. A solution of MeOH (0.36 mL, 9.0 mmol) in  $\text{CH}_2\text{Cl}_2$  (0.6 mL) was added dropwise. The reaction was stirred for 15 min at 0 °C and then quenched with saturated  $\text{NaHCO}_3$  (25 mL). The mixture was extracted with  $\text{CH}_2\text{Cl}_2$  (4 x 20 mL) and the combined organic extracts were dried ( $\text{Na}_2\text{SO}_4$ ) and

concentrated. The residue was purified by column chromatography (6% - 20% EtOAc in hexanes containing 0.5% Et<sub>3</sub>N) to give the desired products (77.2 mg, 55.3%) as a colorless oil in a 2.4:1.0 diastereomeric ratio. Further purification by column chromatography (8% - 14% EtOAc in hexanes containing 0.5% Et<sub>3</sub>N) yielded pure samples. For the faster eluting *anti*-product: <sup>1</sup>H NMR (300 MHz, CDCl<sub>3</sub>) δ 7.38 (app t, *J* = 7.7 Hz, 2H), 7.24-7.12 (m, 3H), 5.90 (d, *J* = 9.8 Hz, 1H), 4.88 (d, *J* = 10.0 Hz, 1H), 3.59-3.49 (m, 1H), 3.52 (s, 3H), 3.44 (s, 3H), 1.55-1.27 (m, 10H), 0.90 (t, *J* = 6.9 Hz, 3H); <sup>13</sup>C NMR (75 MHz, CDCl<sub>3</sub>) 155.2, 151.0, 129.5, 125.6, 121.7, 85.6, 82.4, 59.7, 56.0, 31.9, 31.4, 29.5, 25.6, 22.8, 14.3; IR (neat) 3322, 2930, 2857, 1747, 1515, 1487, 1334, 1206, 1103, 1025, 952, 738; HRMS (ESI): *m/z* calcd for C<sub>17</sub>H<sub>27</sub>NO<sub>4</sub>Na [M<sup>+</sup>+Na] 332.1838, found 332.1830. For the slower eluting *syn*-product: <sup>1</sup>H NMR (300 MHz, CDCl<sub>3</sub>) δ 7.40-7.34 (m, 2H), 7.29-7.22 (m, 3H), 5.82 (d, *J* = 9.7 Hz, 1H), 5.00 (dd, *J* = 10.0, 2.9 Hz, 1H), 3.41 (s, 3H), 3.40 (s, 3H), 3.18 (dt, *J* = 6.8, 2.9 Hz, 1H), 1.62-1.55 (m, 2H), 1.40-1.24 (m, 8H), 0.90 (t, *J* = 6.8 Hz, 3H); <sup>13</sup>C NMR (75 MHz, CDCl<sub>3</sub>) δ 154.9, 151.0, 129.5, 125.7, 121.7, 82.9, 82.6, 58.4, 56.5, 31.9, 29.7, 29.0, 25.6, 22.8, 14.3; IR (neat) 3324, 2928, 2857, 1747, 1523, 1488, 1356, 1209, 1086, 954 cm<sup>-1</sup>; HRMS (ESI): *m/z* calcd for C<sub>17</sub>H<sub>27</sub>NO<sub>4</sub>Na (M<sup>+</sup>+Na) 332.1838, found 332.1841.

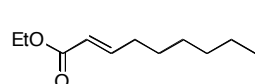

**(*E*)-Ethyl non-2-enoate**

<sup>1</sup>H NMR (300 MHz, CDCl<sub>3</sub>) δ 6.97 (td, *J* = 15.6, 7.0 Hz, 1H), 5.81 (td, *J* = 15.7, 1.5 Hz, 1H), 4.19 (q, *J* = 7.1 Hz, 2H), 2.20 (qd, *J* = 7.0, 1.5 Hz, 2H), 1.50-1.41 (m, 2H), 1.36-1.27 (m, 9H), 0.89 (t, *J* = 6.9 Hz, 3H); <sup>13</sup>C NMR (75 MHz, CDCl<sub>3</sub>) δ 167.0, 149.7, 121.4, 60.3, 32.4, 31.8, 29.0, 28.2, 22.8, 14.5, 14.3.

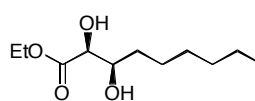

**(2*S*,3*R*)-Ethyl 2,3-dihydroxynonanoate**

To a mixture of AD-mix-β in <sup>t</sup>BuOH/H<sub>2</sub>O (20 mL, 1:1, v/v) at 0 °C was added CH<sub>3</sub>SO<sub>2</sub>NH<sub>2</sub> (0.190 g, 2.00 mmol) followed by a solution of enoate (0.368 g, 2.00 mmol) in <sup>t</sup>BuOH (0.5 mL). The mixture was stirred at 0 °C for 6 h and then at room temperature for 10 h. The mixture was cooled to 0 °C and quenched with aqueous Na<sub>2</sub>SO<sub>3</sub> (10%, 30 mL). After stirring at 0 °C for 1 h, the mixture was extracted with CH<sub>2</sub>Cl<sub>2</sub> (3 x 30 mL). The organic extracts were dried (MgSO<sub>4</sub>) and concentrated. The residue was purified by column chromatography (30% - 40% EtOAc in hexanes) to give the diol (0.402 g, 92.0%) as a white solid: <sup>1</sup>H NMR (300 MHz, CDCl<sub>3</sub>) δ 4.29 (q, *J* = 7.1 Hz, 2H), 4.08 (dd, *J* = 5.3, 2.0 Hz, 1H), 3.88 (dtd, *J* = 8.9, 6.9, 2.1 Hz, 1H), 3.12 (d, *J* = 5.3 Hz, 1H), 1.98 (d, *J* = 9.2 Hz, 1H), 1.64-1.58 (m, 2H), 1.52-1.44 (m, 1H), 1.39-1.25 (m, 10H), 0.89 (t, *J* = 6.9 Hz, 3H); <sup>13</sup>C NMR (75 MHz, CDCl<sub>3</sub>) δ 173.9, 73.2, 72.7, 62.3, 34.0, 32.0, 29.4, 25.9, 22.8, 14.4, 14.3; IR (neat) 3377, 2925, 2854, 1737, 1462, 1294, 1136, 1099, 1072 cm<sup>-1</sup>; HRMS (ESI): *m/z* calcd for C<sub>11</sub>H<sub>22</sub>O<sub>4</sub>Na (M<sup>+</sup>+Na) 241.1416, found 241.1420; [α]<sub>D</sub><sup>25</sup> = +12.6 (CHCl<sub>3</sub>, *c* 0.98).

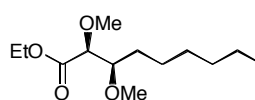

**(2*S*,3*R*)-Ethyl 2,3-dimethoxynonanoate**

To a solution of the diol (170 mg, 0.779 mmol) in CH<sub>2</sub>Cl<sub>2</sub> (4.0 mL) were added Ag<sub>2</sub>O (271 mg, 1.17 mmol) and MeI (0.22 mL, 3.5 mmol). The reaction was stirred at reflux for 10 h, and Ag<sub>2</sub>O (271 mg, 1.17 mmol) and MeI (0.22 mL, 3.5 mmol) were added sequentially. After 12 h, Ag<sub>2</sub>O (271 mg, 1.17 mmol) and MeI (0.22 mL, 3.50 mmol) were added. The mixture was stirred at reflux for another 6 h, then filtered through Celite. The residue was washed with CH<sub>2</sub>Cl<sub>2</sub> (30 mL), the combined filtrate was concentrated, and the resulting residue was purified by column chromatography (5% - 15% EtOAc in hexanes) to give the desired product (59.4 mg, 31.0%) as a colorless oil: <sup>1</sup>H NMR (300 MHz, CDCl<sub>3</sub>) δ 4.32-4.21 (m, 2H), 3.78 (d, *J* = 4.1 Hz, 1H), 3.51 (dt, *J* = 6.5, 4.1

Hz, 1H), 3.44 (s, 3H), 3.39 (s, 3H), 1.61-1.54 (m, 2H), 1.34-1.26 (m, 11H), 0.89 (t,  $J = 6.8$  Hz, 3H);  $^{13}\text{C}$  NMR (75 MHz,  $\text{CDCl}_3$ )  $\delta$  171.4, 82.7, 82.0, 61.1, 59.2, 58.6, 32.0, 30.1, 29.6, 25.8, 22.8, 14.5, 14.3; IR (neat) 2927, 1747, 1464, 1261, 1190, 1143, 1105, 1031  $\text{cm}^{-1}$ ; HRMS (ESI):  $m/z$  calcd for  $\text{C}_{13}\text{H}_{26}\text{O}_4\text{Na}$  ( $\text{M}^+\text{+Na}$ ) 269.1729, found 269.1713;  $[\alpha]_{\text{D}}^{25} = -29.7$  ( $\text{CHCl}_3$ ,  $c$  0.63).

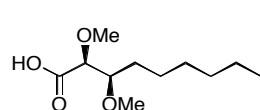

**(2S,3R)-2,3-Dimethoxynonanoic acid (9)**

To a solution of the ethyl ester (40 mg, 0.16 mmol) in 1,2-dimethoxyethane/ $\text{H}_2\text{O}$  (2.8 mL, 4:1, v/v) was added  $\text{LiOH}\cdot\text{H}_2\text{O}$  (14 mg, 0.33 mmol). After 3 and 4 h,  $\text{LiOH}\cdot\text{H}_2\text{O}$  (7 mg, 0.16 mmol) was added, respectively. The reaction was stirred for another 3 h, then quenched with aqueous  $\text{HCl}$  (0.5 N,  $\sim 1.0$  mL) to  $\text{pH}\sim 1.5$  and extracted with  $\text{Et}_2\text{O}$  (5 x 10 mL). The combined organic extracts were dried ( $\text{Na}_2\text{SO}_4$ ) and concentrated. The residue was purified by column chromatography (30%  $\text{EtOAc}$  in hexanes followed by 50%  $\text{MeOH}$  in  $\text{EtOAc}$ ) to give the unreacted ester (7.6 mg, 19.0%) and carboxylic acid (28.1 mg, 79.4%) as a white sticky solid:  $^1\text{H}$  NMR (300 MHz,  $\text{CD}_3\text{OD}$ )  $\delta$  3.66 (d,  $J = 3.0$  Hz, 1H), 3.54 (dt,  $J = 6.7, 3.1$  Hz, 1H), 3.42 (s, 3H), 3.41 (s, 3H), 1.69-1.57 (m, 2H), 1.46-1.29 (m, 8H), 0.91 (t,  $J = 6.8$  Hz, 3H);  $^{13}\text{C}$  NMR (75 MHz,  $\text{CD}_3\text{OD}$ )  $\delta$  178.2, 84.9, 83.9, 59.4, 58.9, 32.9, 31.2, 30.5, 26.8, 23.7, 14.4  $\text{cm}^{-1}$ ; IR (neat) 3401, 2926, 2856, 1618, 1418, 1194, 1091; HRMS (ESI):  $m/z$  calcd for  $\text{C}_{11}\text{H}_{22}\text{O}_4\text{Na}$  ( $\text{M}^+\text{+Na}$ ) 241.1416, found 241.1407;  $[\alpha]_{\text{D}} = -26.0$  ( $\text{CH}_3\text{OH}$ ,  $c$  0.77).

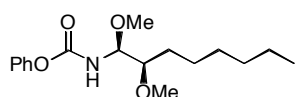

**Phenyl (1S,2R)-1,2-dimethoxyoctylcarbamate (4)**

To a stirred solution of the carboxylic acid (15 mg, 70  $\mu\text{mol}$ ) in benzene (2.0 mL) was added  $\text{Et}_3\text{N}$  (0.12 mL, 0.85 mmol) followed by diphenyl phosphoryl azide (61  $\mu\text{L}$ , 0.28 mmol). After 2 h, diphenylphosphoryl azide (30  $\mu\text{L}$ , 0.14 mmol) was added. The reaction was stirred for 2 h, then quenched with water (10 mL) and extracted with  $\text{Et}_2\text{O}$  (3 x 20 mL). The organic extracts were dried ( $\text{Na}_2\text{SO}_4$ ) and concentrated. The residue was purified by column chromatography (5% - 15%  $\text{EtOAc}$  in hexanes) to give carbamate (11.4 mg, 52.3%) as a colorless oil:  $[\alpha]_{\text{D}}^{25} = -3.8$  ( $\text{CHCl}_3$ ,  $c$  0.52). No other diastereomer was observed.

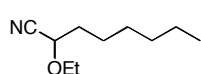

**2-Ethoxyoctanenitrile (10)**

To a mixture of heptanal (4.00 g, 35.0 mmol), absolute  $\text{EtOH}$  (80 mL),  $(\text{EtO})_3\text{CH}$  (5.8 mL, 35.0 mmol) and activated 4 $\text{\AA}$  molecular sieves (4.00 g) at 0  $^\circ\text{C}$  was added concentrated  $\text{H}_2\text{SO}_4$  (2.0 mL) dropwise and the mixture was stirred at room temperature overnight. After that time, the reaction mixture was concentrated to  $\sim 30$  mL and slowly poured onto a cold saturated  $\text{NaHCO}_3$  solution (80 mL) at 0  $^\circ\text{C}$ . The resulting mixture was filtered through Celite. The filtrate was extracted with  $\text{CH}_2\text{Cl}_2$  (3 x 80 mL) and the extracts were dried ( $\text{Na}_2\text{SO}_4$ ) and concentrated. The resulting residue was dissolved in  $\text{CH}_2\text{Cl}_2$  (70 mL), and  $\text{BiBr}_3$  (1.57 g, 3.50 mmol) and  $\text{TMSCN}$  (5.60 mL, 42.0 mmol) were added sequentially. The reaction was stirred overnight, then quenched with saturated  $\text{NaHCO}_3$  solution (50 mL)/water (20 mL) and extracted with  $\text{CH}_2\text{Cl}_2$  (3 x 100 mL). The combined extracts were dried ( $\text{Na}_2\text{SO}_4$ ) and concentrated. The residue was purified by column chromatography (2% - 5%  $\text{EtOAc}$  in hexanes) to give the ethoxy cyanide (4.51 g, 76.0%) as a colorless liquid.  $^1\text{H}$  NMR (300 MHz,  $\text{CDCl}_3$ )  $\delta$  4.11 (t,  $J = 6.6$  Hz, 1H), 3.82 (qd,  $J = 8.8, 6.9$  Hz, 1H), 3.51 (qd,  $J = 8.9, 7.0$  Hz, 1H), 1.87-1.80 (m, 2H), 1.52-1.44 (m, 2H), 1.38-1.30 (m, 6H), 1.26 (t,  $J = 7.0$  Hz, 3H), 0.89 (t,  $J = 6.7$  Hz, 3H);  $^{13}\text{C}$  NMR (75 MHz,  $\text{CDCl}_3$ )  $\delta$  118.9, 69.0, 66.4, 33.8, 31.7, 28.9, 24.9, 22.7, 15.0, 14.2; IR (neat) 2957, 2930, 2860, 1468, 1335, 1126, 1108, 735  $\text{cm}^{-1}$ ; HRMS (EI):  $m/z$  calcd for  $\text{C}_{10}\text{H}_{19}\text{NO}$  ( $\text{M}^+$ ) 169.1467, found 169.1474.

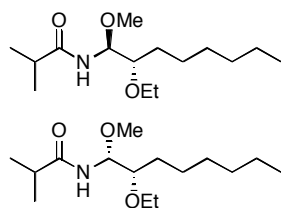

**Representative procedure for the preparation of acyl amins:**

**(±)-N-((1R,2R)-2-Ethoxy-1-methoxyoctyl)isobutyramide ( 11 ) and (±)-N-((1S,2R)-2-ethoxy-1-methoxyoctyl)isobutyramide ( 12 )**

To a solution of ethoxynitrile **11** (100.0 mg, 0.591 mmol) in CH<sub>2</sub>Cl<sub>2</sub> (4.5 mL) was added Cp<sub>2</sub>Zr(H)Cl (229 mg, 0.886 mmol). The reaction was stirred for 15 min, then cooled to 0 °C and isobutyryl chloride (94 μL, 0.89 mmol) was added dropwise. The mixture was stirred for 15 min at 0 °C and MeOH (1.0 mL, 24 mmol) was added dropwise. The reaction was stirred for 15 min at 0 °C and quenched with AcOH (2.0 mL)/water (20 mL). The mixture was extracted with CH<sub>2</sub>Cl<sub>2</sub> (3 x 25 mL) and the combined organic extracts were washed with saturated NaHCO<sub>3</sub> (15 mL), dried (Na<sub>2</sub>SO<sub>4</sub>) and concentrated. The residue was purified by column chromatography (15% - 30% EtOAc in hexanes) to give the desired product (121 mg, 75.1%) as a white solid in a 2.3:1.0 diastereomeric ratio. Further purification (15% - 30% EtOAc in hexanes) yielded pure samples. For faster eluting *anti*-product **12**: <sup>1</sup>H NMR (300 MHz, CDCl<sub>3</sub>) δ 6.20 (d, *J* = 9.5 Hz, 1H), 5.01 (dd, *J* = 9.7, 1.4 Hz, 1H), 3.74 (qd, *J* = 9.4, 7.0 Hz, 1H), 3.54 (qd, 9.4, 7.1 Hz, 1H), 3.47-3.43 (m, 1H), 3.29 (s, 3H), 2.40 (sept, *J* = 6.9 Hz, 1H), 1.37-1.23 (m, 10H), 1.18-1.14 (m, 9H), 0.84 (app t, *J* = 6.8 Hz, 3H); <sup>13</sup>C NMR (75 MHz, CDCl<sub>3</sub>) δ 177.9, 82.6, 80.6, 67.3, 55.8, 36.1, 31.9, 31.8, 29.4, 25.6, 22.7, 19.8, 19.7, 15.8, 14.2; IR (neat) 3271, 2965, 2920, 1653, 1540, 1467, 1233, 1113, 1101 cm<sup>-1</sup>; HRMS (EI): *m/z* calcd for C<sub>14</sub>H<sub>28</sub>NO<sub>2</sub> (M<sup>+</sup>-CH<sub>3</sub>O) 242.2120, found 242.2123. For slower eluting *syn*-product **13**: <sup>1</sup>H NMR (300 MHz, CDCl<sub>3</sub>) δ 6.20 (d, *J* = 9.7 Hz, 1H), 5.17 (dd, *J* = 9.8, 2.9 Hz, 1H), 3.66 (qd, *J* = 9.4, 7.0 Hz, 1H), 3.46 (qd, *J* = 9.3, 7.0 Hz, 1H), 3.36 (s, 3H), 3.24 (dt, *J* = 6.8, 2.9 Hz, 1H), 2.42 (sept, *J* = 6.9 Hz, 1H), 1.63-1.55 (m, 2H), 1.40-1.25 (m, 10H), 1.23-1.17 (m, 9H), 0.88 (t, *J* = 6.8 Hz, 3H); <sup>13</sup>C NMR (75 MHz, CDCl<sub>3</sub>) δ 177.5, 81.0, 80.0, 66.1, 56.4, 36.2, 31.9, 29.8, 29.7, 25.6, 22.8, 19.9, 19.7, 15.8, 14.2; IR (neat) 3273, 2971, 2921, 1651, 1538, 1467, 1154, 1103, 1072 cm<sup>-1</sup>; HRMS (EI): *m/z* calcd for C<sub>14</sub>H<sub>28</sub>NO<sub>2</sub> (M<sup>+</sup>-CH<sub>3</sub>O) 242.2120, found 242.2119.

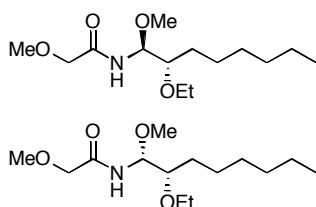

**(±)-N-((1R,2R)-2-Ethoxy-1-methoxyoctyl)-2-methoxyacetamide ( 13 ) and (±)-N-((1S,2R)-2-ethoxy-1-methoxyoctyl)-2-methoxyacetamide ( 14 )**

The title compounds were prepared by following the representative procedure with the following amounts of reagents: ethoxynitrile (100.0 mg, 0.591 mmol), CH<sub>2</sub>Cl<sub>2</sub> (4.5 mL), Cp<sub>2</sub>Zr(H)Cl (168 mg, 0.650 mmol), methoxyacetyl chloride (65 μL, 0.71 mmol) MeOH (1.0 ml, 24 mmol). The reaction was quenched with 1 N HCl (2.0 mL)/water (15 mL) and extracted with CH<sub>2</sub>Cl<sub>2</sub> (3 x 25 mL). The combined organic extracts were washed with saturated NaHCO<sub>3</sub> (15 mL), dried (Na<sub>2</sub>SO<sub>4</sub>) and concentrated. The residue was purified by column chromatography (20% - 40% EtOAc in hexanes) to give the desired product (112 mg, 68.7%) as a colorless oil in a 1.7:1.0 diastereomeric ratio. Further purification (20% - 40% EtOAc in hexanes) yielded pure samples. For faster eluting *anti*-product **14**: <sup>1</sup>H NMR (300 MHz, CDCl<sub>3</sub>) δ 7.18 (d, *J* = 9.8 Hz, 1H), 5.06 (dd, *J* = 10.0, 1.5 Hz, 1H), 3.98 (d, *J* = 15.2 Hz, 1H), 3.90 (d, *J* = 15.2 Hz, 1H), 3.76 (qd, *J* = 9.4, 7.0 Hz, 1H), 3.56 (qd, *J* = 9.3, 7.0 Hz, 1H), 3.49-3.45 (m, 1H), 3.43 (s, 3H), 3.33 (s, 3H), 1.45-1.25 (m, 10H), 1.18 (t, *J* = 7.0 Hz, 3H), 0.86 (t, *J* = 6.9 Hz, 3H); <sup>13</sup>C NMR (75 MHz, CDCl<sub>3</sub>) δ 170.8, 82.4, 80.5, 72.0, 67.3, 59.4, 56.1, 31.9, 31.8, 29.4, 25.7, 22.8, 15.8, 14.2; IR (neat) 3413, 2930, 2858, 1695, 1506, 1113 cm<sup>-1</sup>; HRMS (EI): *m/z* calcd for C<sub>13</sub>H<sub>26</sub>NO<sub>3</sub> (M<sup>+</sup>-CH<sub>3</sub>O) 244.1913, found 244.1925. For slower eluting *syn*-product: <sup>1</sup>H NMR (300 MHz, CDCl<sub>3</sub>) δ 7.22 (d, *J* = 10.0 Hz, 1H), 5.18



(dd,  $J = 10.1, 3.0$  Hz, 1H), 3.98 (d,  $J = 15.3$  Hz, 1H), 3.92 (d,  $J = 15.3$  Hz, 1H), 3.66 (qd,  $J = 9.2, 7.0$  Hz, 1H), 3.50 (qd,  $J = 9.2, 7.0$  Hz, 1H), 3.43 (s, 3H), 3.36 (s, 3H), 3.26 (dt,  $J = 6.8, 3.0$  Hz, 1H), 1.63-1.55 (m, 2H), 1.41-1.29 (m, 8H), 1.21 (t,  $J = 7.0$  Hz, 3H), 0.88 (t,  $J = 6.8$  Hz, 3H);  $^{13}\text{C}$  NMR (75 MHz,  $\text{CDCl}_3$ )  $\delta$  170.4, 81.0, 79.8, 72.0, 66.5, 59.4, 56.5, 31.9, 29.9, 29.6, 25.7, 22.8, 15.7, 14.3; IR (neat) 3417, 2928, 2858, 1686, 1510, 1112, 1078  $\text{cm}^{-1}$ ; HRMS (EI):  $m/z$  calcd for  $\text{C}_{13}\text{H}_{26}\text{NO}_3$  ( $\text{M}^+ - \text{CH}_3\text{O}$ ) 244.1913, found 244.1917.

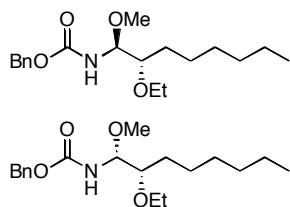

**(±)-Benzyl (1*R*,2*R*)-2-ethoxy-1-methoxyoctylcarbamate (14) and (±)-benzyl (1*S*,2*R*)-2-ethoxy-1-methoxyoctylcarbamate**

The title compounds were prepared by following the representative procedure with the following amounts of reagents: ethoxynitrile (60.0 mg, 0.354 mmol),  $\text{CH}_2\text{Cl}_2$  (3.5 mL),  $\text{Cp}_2\text{Zr}(\text{H})\text{Cl}$  (110.0 mg, 0.425 mmol). After completion of the hydrozirconation, the reaction mixture was cooled to 0 °C and benzyl chloroformate (71  $\mu\text{L}$ , 0.500 mmol) was added dropwise. The cold bath was removed and the mixture was stirred for 10 min. After that time, the flask was cooled to 0 °C and benzyl chloroformate (50  $\mu\text{L}$ , 0.35 mmol) was added. The mixture was stirred at room temperature for 30 min and then cooled to 0 °C. A solution of MeOH (0.28 mL, 7.1 mmol) in  $\text{CH}_2\text{Cl}_2$  (0.5 mL) was added dropwise. The reaction was stirred for 10 min at 0 °C and then quenched with saturated  $\text{NaHCO}_3$  (20 mL). The mixture was extracted with  $\text{CH}_2\text{Cl}_2$  (3 x 20 mL) and the combined organic extracts were dried ( $\text{Na}_2\text{SO}_4$ ) and concentrated. The residue was purified by column chromatography (5% - 20% EtOAc in hexanes containing 0.5%  $\text{Et}_3\text{N}$ ) to give the desired product (76.3 mg, 63.8%) as a colorless oil in a 1.5:1.0 diastereomeric ratio. Further purification (10% - 13% EtOAc in hexanes containing 0.5%  $\text{Et}_3\text{N}$ ) yielded pure materials. For faster eluting *anti*-product:  $^1\text{H}$  NMR (300 MHz,  $\text{CDCl}_3$ )  $\delta$  7.39-7.30 (m, 5H), 5.66 (d,  $J = 9.8$  Hz, 1H), 5.14 (s, 2H), 4.82 (dd,  $J = 9.9, 1.0$  Hz, 1H), 3.74 (qd,  $J = 9.3, 7.0$  Hz, 1H), 3.56 (qd,  $J = 9.2, 7.0$  Hz, 1H), 3.48-3.44 (m, 1H), 3.37 (s, 3H), 1.46-1.28 (m, 10H), 1.17 (t,  $J = 7.0$  Hz, 3H), 0.89 (t,  $J = 7.0$  Hz, 3H);  $^{13}\text{C}$  NMR (75 MHz,  $\text{CDCl}_3$ )  $\delta$  156.8, 136.6, 128.7, 128.4, 128.2, 85.6, 80.6, 67.4, 67.1, 55.7, 31.9, 29.5, 25.7, 22.8, 15.9, 14.3; IR (neat) 3337, 2929, 2858, 1731, 1497, 1456, 1326, 1216, 1107, 966, 735  $\text{cm}^{-1}$ ; HRMS (ESI):  $m/z$  calcd for  $\text{C}_{19}\text{H}_{31}\text{NO}_4\text{Na}$  ( $\text{M}^+ + \text{Na}$ ) 360.2151, found 360.2148. For slower eluting *syn*-product:  $^1\text{H}$  NMR (300 MHz,  $\text{CDCl}_3$ )  $\delta$  7.40-7.31 (m, 5H), 5.54 (d,  $J = 10.0$  Hz, 1H), 5.15/5.14 (two s, 2H), 4.94 (dd,  $J = 10.1, 2.9$  Hz, 1H), 3.64 (qd,  $J = 9.2, 7.0$  Hz, 1H), 3.48 (qd,  $J = 9.2, 7.0$  Hz, 1H), 3.38 (s, 3H), 3.28 (dt,  $J = 6.8, 2.9$  Hz, 1H), 1.63-1.52 (m, 2H), 1.41-1.26 (m, 8H), 1.20 (t,  $J = 7.0$  Hz, 3H), 0.89 (t,  $J = 6.8$  Hz, 3H);  $^{13}\text{C}$  NMR (75 MHz,  $\text{CDCl}_3$ )  $\delta$  156.6, 136.5, 128.8, 128.5, 128.4, 82.9, 81.1, 77.4, 67.2, 66.2, 56.3, 31.9, 29.7, 29.6, 25.7, 22.8, 15.8, 14.3; IR (neat) 3334, 2928, 2858, 1729, 1501, 1455, 1232, 1097, 737  $\text{cm}^{-1}$ ; HRMS (ESI):  $m/z$  calcd for  $\text{C}_{19}\text{H}_{31}\text{NO}_4\text{Na}$  ( $\text{M}^+ + \text{Na}$ ) 360.2151, found 360.2149.

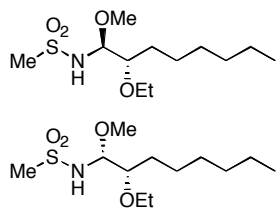

**(±)-*N*-(2-Ethoxy-1-methoxyoctyl)methanesulfonamide (15)**

The title compounds were prepared by following the representative procedure with the following amounts of reagents: ethoxynitrile (100.0 mg, 0.591 mmol),  $\text{CH}_2\text{Cl}_2$  (4.5 mL),  $\text{Cp}_2\text{Zr}(\text{H})\text{Cl}$  (228 mg, 0.886 mmol). After addition of methanesulfonic anhydride (144 mg, 0.827 mmol), The mixture was stirred for 2 min at 0 °C and MeOH (1.0 mL, 23.6 mmol) was added dropwise. The reaction was stirred for 10 min at 0 °C and quenched with saturated  $\text{NaHCO}_3$  (15 mL). The mixture was extracted with  $\text{CH}_2\text{Cl}_2$  (3 x 20 mL) and the combined organic extracts were dried ( $\text{Na}_2\text{SO}_4$ ) and concentrated. The residue was purified by column chromatography (20% - 30% EtOAc in hexanes) to give the desired product (40.8 mg, 24.5%) as a colorless oil in a 2.4:1.0

diastereomeric ratio:  $^1\text{H}$  NMR (300 MHz,  $\text{CDCl}_3$ )  $\delta$  5.42 (d,  $J = 9.4$  Hz, 71% of 1H), 5.22 (d,  $J = 9.5$  Hz, 29% of 1H), 4.64 (dd,  $J = 9.5, 3.1$  Hz, 29% of 1H), 4.48 (dd,  $J = 9.4, 2.4$  Hz, 71% of 1H), 3.72-3.52 (m, 2H), 3.45 (s, 29% of 3H), 3.46-3.42 (m, 71% of 1H), 3.40 (s, 71% of 3H), 3.32 (ddd,  $J = 7.2, 5.6, 3.1$  Hz, 29% of 1H), 3.06 (s, 29% of 3H), 3.05 (s, 71% of 3H), 1.56-1.25 (m, 10H), 1.21 (t,  $J = 6.9$  Hz, 29% of 3H), 1.18 (t,  $J = 7.0$  Hz, 71% of 3H), 0.88 (app t,  $J = 6.8$  Hz, 3H);  $^{13}\text{C}$  NMR (75 MHz,  $\text{CDCl}_3$ )  $\delta$  88.1 (major), 86.0 (minor), 81.2 (minor), 79.5 (major), 67.2 (major), 66.4 (minor), 56.5, (minor), 55.7 (major), 43.3 (major), 43.2 (minor), 31.9, 31.6 (major), 29.6 (minor), 29.5 (major), 29.3 (minor), 25.8 (minor), 25.4 (major), 22.8, 15.8 (major), 15.7 (minor), 14.2; IR (neat) 3286, 2926, 2858, 1458, 1328, 1161, 1110, 978, 766  $\text{cm}^{-1}$ ; HRMS (EI):  $m/z$  calcd for  $\text{C}_{11}\text{H}_{24}\text{NO}_3\text{S}$  ( $\text{M}^+ - \text{CH}_3\text{O}$ ) 250.1477, found 250.1466.

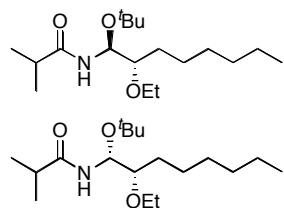

**(±)-*N*-((1*R*,2*R*)-2-Ethoxy-1-*tert*-butoxyoctyl)isobutyramide and (±)-*N*-((1*S*,2*R*)-2-ethoxy-1-*tert*-butoxyoctyl)isobutyramide (16)**

The title compounds were prepared by following the representative procedure with the following amounts of reagents: ethoxynitrile (60.0 mg, 0.354 mmol),  $\text{CH}_2\text{Cl}_2$  (3.5 mL),  $\text{Cp}_2\text{Zr}(\text{H})\text{Cl}$  (110 mg, 0.425 mmol). After addition of isobutyryl chloride (52  $\mu\text{L}$ , 0.50 mmol), the cold bath was removed and the mixture was stirred for 10 min. After that time, the flask was cooled to 0  $^\circ\text{C}$  and a solution of  $t\text{BuOH}$  (0.67 mL, 7.08 mmol) in  $\text{CH}_2\text{Cl}_2$  (0.5 mL) was added dropwise to the reaction mixture over 3 min. The reaction was stirred for 10 min at 0  $^\circ\text{C}$ , then diluted with  $\text{CH}_2\text{Cl}_2$  (10 mL) and quenched with saturated  $\text{NaHCO}_3$  (20 mL). The organic layer was separated and the aqueous layer was extracted with  $\text{CH}_2\text{Cl}_2$  (3 x 15 mL). The combined organic extracts were dried ( $\text{Na}_2\text{SO}_4$ ) and concentrated. The residue was purified by column chromatography (10% - 20% EtOAc in hexanes containing 0.5%  $\text{Et}_3\text{N}$ ) to give the desired product (79.2 mg, 70.8%) as a white solid in a 1.0:2.0 diastereomeric ratio. Further purification (12% - 18% EtOAc in hexanes containing 0.5%  $\text{Et}_3\text{N}$ ) yielded pure samples. For faster eluting *anti*-product:  $^1\text{H}$  NMR (300 MHz,  $\text{CDCl}_3$ )  $\delta$  6.10 (d,  $J = 9.2$  Hz, 1H), 5.32 (dd,  $J = 9.4, 2.0$  Hz, 1H), 3.84 (qd,  $J = 9.6, 7.1$  Hz, 1H), 3.58 (qd,  $J = 9.6, 7.0$  Hz, 1H), 3.30-3.26 (m, 1H), 2.33 (sept,  $J = 6.9$  Hz, 1H), 1.38-1.27 (m, 10H), 1.22 (s, 9H), 1.19-1.12 (m, 9H), 0.87 (t,  $J = 6.8$  Hz, 3H),  $^{13}\text{C}$  NMR (75 MHz,  $\text{CDCl}_3$ )  $\delta$  175.8, 83.0, 75.5, 74.6, 67.6, 36.1, 32.0, 31.6, 29.5, 28.6, 25.9, 22.8, 19.7, 19.4, 15.9, 14.3; IR (neat) 3246, 2969, 2922, 2858, 1648, 1552, 1466, 1109, 1069  $\text{cm}^{-1}$ ; HRMS (ESI):  $m/z$  calcd for  $\text{C}_{18}\text{H}_{37}\text{NO}_3\text{Na}$  ( $\text{M}^+ + \text{Na}$ ) 338.2671, found 338.2663. For slower eluting *syn*-product:  $^1\text{H}$  NMR (300 MHz,  $\text{CDCl}_3$ )  $\delta$  6.00 (d,  $J = 9.2$  Hz, 1H), 5.39 (dd,  $J = 9.4, 4.0$  Hz, 1H), 3.64-3.54 (m, 2H), 3.14-3.09 (m, 1H), 2.30 (sept,  $J = 6.9$  Hz, 1H), 1.51-1.38 (m, 2H), 1.35-1.24 (m, 8H), 1.20 (s, 9H), 1.19-1.11 (m, 9H), 0.87 (t,  $J = 6.9$  Hz, 3H);  $^{13}\text{C}$  NMR (75 MHz,  $\text{CDCl}_3$ )  $\delta$  175.3, 82.1, 74.9, 74.3, 66.8, 36.1, 32.0, 30.2, 29.6, 28.5, 26.0, 22.8, 19.5, 19.4, 15.8, 14.3; IR (neat) 3254, 2960, 2920, 2856, 1646, 1544, 1459, 1365, 1193, 1109, 1072, 731  $\text{cm}^{-1}$ ; HRMS (ESI):  $m/z$  calcd for  $\text{C}_{18}\text{H}_{37}\text{NO}_3\text{Na}$  ( $\text{M}^+ + \text{Na}$ ) 338.2671, found 338.2666.

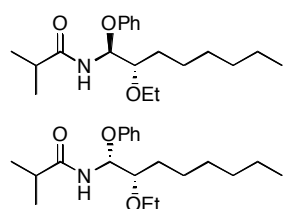

**(±)-*N*-((1*R*,2*R*)-2-Ethoxy-1-phenoxyoctyl)isobutyramide (17) and (±)-*N*-((1*S*,2*R*)-2-ethoxy-1-phenoxyoctyl)isobutyramide**

The title compounds were prepared by following the representative procedure with the following amounts of reagents: ethoxynitrile (60.0 mg, 0.354 mmol),  $\text{CH}_2\text{Cl}_2$  (3.5 mL),  $\text{Cp}_2\text{Zr}(\text{H})\text{Cl}$  (110 mg, 0.425 mmol). After addition of isobutyryl chloride (52  $\mu\text{L}$ , 0.50 mmol), the cold bath was removed and the mixture was stirred for 10 min. The mixture was cooled to  $0^\circ\text{C}$  and a solution of  $\text{PhOH}$  (333 mg, 3.54 mmol) in  $\text{CH}_2\text{Cl}_2$  (0.5 mL) was added dropwise. The

reaction was stirred at °C for 40 min, then quenched with saturated NaHCO<sub>3</sub> solution (20 mL) and extracted with CH<sub>2</sub>Cl<sub>2</sub> (4 x 15 mL). The organic extracts were washed with saturated Na<sub>2</sub>CO<sub>3</sub> solution (20 mL), dried (Na<sub>2</sub>SO<sub>4</sub>) and concentrated. The residue was purified by column chromatography (7% - 10% EtOAc in hexanes containing 0.5% Et<sub>3</sub>N) to give the desired product (81.7 mg, 68.7%) as a white solid in a 5.6:1.0 diastereomeric ratio. Further purification (7% - 10% EtOAc in hexanes containing 0.5% Et<sub>3</sub>N) yielded pure samples. For faster eluting *anti*-product: <sup>1</sup>H NMR (300 MHz, CDCl<sub>3</sub>) δ 7.30-7.23 (m, 2H), 7.03 (app td, *J* = 7.8, 1.0 Hz, 2H), 6.96 (app tt, *J* = 7.3, 0.9 Hz, 1H), 6.36 (d, *J* = 9.9 Hz, 1H), 5.92 (dd, *J* = 9.9, 1.4 Hz, 1H), 3.96 (qd, *J* = 9.4, 7.0 Hz, 1H), 3.72 (qd, *J* = 9.5, 7.0 Hz, 1H), 3.68-3.64 (m, 1H), 2.37 (sept, *J* = 6.9 Hz, 1H), 1.47-1.37 (m, 4H), 1.33-1.24 (m, 9H), 1.15 (d, *J* = 6.9 Hz, 3H), 1.08 (d, *J* = 6.9 Hz, 3H), 0.88 (t, *J* = 6.8 Hz, 3H); <sup>13</sup>C NMR (75 MHz, CDCl<sub>3</sub>) δ 177.1, 156.4, 129.7, 121.8, 116.5, 80.7, 80.0, 68.1, 36.0, 31.9, 29.4, 25.7, 22.8, 19.6, 19.5, 16.0, 14.2; IR (neat) 3290, 2964, 2929, 2859, 1657, 1595, 1534, 1495, 1222, 1107, 753 cm<sup>-1</sup>; HRMS (ESI): *m/z* calcd for C<sub>20</sub>H<sub>33</sub>NO<sub>3</sub>Na (M<sup>+</sup>+Na) 358.2358, found 358.2359. For slower eluting *syn*-product: <sup>1</sup>H NMR (300 MHz, CDCl<sub>3</sub>) δ 7.30-7.24 (m, 2H), 7.07-7.04 (m, 2H), 6.97 (app tt, *J* = 7.3, 0.9 Hz, 1H), 6.24 (d, *J* = 9.8 Hz, 1H), 6.02 (dd, *J* = 9.8, 3.4 Hz, 1H), 3.72 (qd, *J* = 9.4, 7.0 Hz, 1H), 3.62 (qd, *J* = 9.4, 7.0 Hz, 1H), 3.44 (dt, *J* = 7.0, 3.3 Hz, 1H), 2.36 (sept, *J* = 6.9 Hz, 1H), 1.71-1.62 (m, 2H), 1.47-1.21 (m, 11H), 1.15 (d, *J* = 6.9 Hz, 3H), 1.10 (d, *J* = 6.9 Hz, 3H), 0.87 (app t, *J* = 6.8 Hz, 3H); <sup>13</sup>C NMR (75 MHz, CDCl<sub>3</sub>) δ 176.5, 156.8, 129.7, 121.9, 116.2, 81.2, 77.8, 66.8, 36.0, 31.9, 30.1, 29.6, 25.7, 22.8, 19.6, 19.5, 15.9, 14.3; IR (neat) 3288, 2963, 2926, 2857, 1653, 1535, 1495, 1220, 1109, 1042, 752 cm<sup>-1</sup>; HRMS (ESI): *m/z* calcd for C<sub>20</sub>H<sub>33</sub>NO<sub>3</sub>Na (M<sup>+</sup>+Na) 358.2358, found 358.2328.

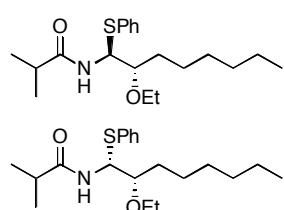

**(±)-*N*-((1*R*,2*R*)-2-Ethoxy-1-(phenylthio)octyl)isobutyramide and (±)-*N*-((1*S*,2*R*)-2-ethoxy-1-(phenylthio)octyl)isobutyramide (18)**

The title compounds were prepared by following the representative procedure with the following amounts of reagents: ethoxynitrile (60.0 mg, 0.354 mmol), CH<sub>2</sub>Cl<sub>2</sub> (3.5 mL), Cp<sub>2</sub>Zr(H)Cl (110 mg, 0.425 mmol). After addition of isobutyryl chloride (52 μL, 0.500 mmol), the cold bath was removed and the mixture was stirred for 10 min. The mixture was cooled to °C and a solution of PhSH (117 mg, 1.06 mmol) in CH<sub>2</sub>Cl<sub>2</sub> (0.3 mL) was added dropwise. The reaction was stirred at °C for 10 min, then quenched with saturated NaHCO<sub>3</sub> solution (20 mL) and extracted with CH<sub>2</sub>Cl<sub>2</sub> (4 x 15 mL). The organic extracts were dried (Na<sub>2</sub>SO<sub>4</sub>) and concentrated. The residue was purified by column chromatography (7% - 13% EtOAc in hexanes containing 0.5% Et<sub>3</sub>N) to give the desired product (89.4 mg, 71.7%) as a white solid in a 1.0:7.1 diastereomeric ratio. Further purification (10% - 16% EtOAc in hexanes containing 0.5% Et<sub>3</sub>N) yielded pure samples. For faster eluting *anti*-product: <sup>1</sup>H NMR (300 MHz, CDCl<sub>3</sub>) δ 7.49-7.45 (m, 2H), 7.31-7.20 (m, 3H), 6.00 (d, *J* = 9.9 Hz, 1H), 5.58 (dd, *J* = 10.0, 1.8 Hz, 1H), 3.76-3.63 (m, 2H), 3.56 (dt, *J* = 6.5, 1.7 Hz, 1H), 2.29 (sept, *J* = 6.9 Hz, 1H), 1.60-1.48 (m, 1H), 1.40-1.14 (m, 12H), 1.08 (d, *J* = 6.9 Hz, 3H), 1.00 (d, *J* = 6.9 Hz, 3H), 0.87 (t, *J* = 6.8 Hz, 3H); <sup>13</sup>C NMR (75 MHz, CDCl<sub>3</sub>) δ 176.3, 133.9, 132.3, 129.1, 127.5, 81.7, 67.3, 60.0, 35.9, 32.5, 31.9, 29.4, 25.7, 22.8, 19.7, 19.6, 15.9, 14.3; IR (neat) 3302, 2962, 2928, 2859, 1652, 1497, 1440, 1379, 1223, 1098, 739 cm<sup>-1</sup>; HRMS (ESI): *m/z* calcd for C<sub>20</sub>H<sub>33</sub>NO<sub>2</sub>SNa (M<sup>+</sup>+Na) 374.2130, found 374.2130. For slower eluting *syn*-product: <sup>1</sup>H NMR (300 MHz, CDCl<sub>3</sub>) δ 7.47-7.44 (m, 2H), 7.30-7.18 (m, 3H), 6.00 (d, *J* = 9.5 Hz, 1H), 5.63 (dd, *J* = 9.7, 3.2 Hz, 1H), 3.69-3.49 (m, 3H), 2.25 (sept, *J* = 6.9 Hz, 1H), 1.73-1.66 (m, 2H), 1.42-1.28 (m, 8H), 1.21 (t, *J* = 7.0 Hz, 3H), 1.06 (d, *J* = 6.9 Hz, 3H), 0.98 (d, *J* = 6.9 Hz, 3H), 0.88 (t, *J* = 6.8 Hz, 3H); <sup>13</sup>C NMR (75 MHz, CDCl<sub>3</sub>) δ 176.0, 133.6, 132.0, 129.1, 127.3, 82.0, 66.0, 59.8, 35.8, 31.9, 31.6, 29.5, 25.8, 22.7, 19.6, 19.5, 15.7, 14.2; IR (neat) 3293,

2962, 2927, 2858, 1650, 1526, 1223, 1100, 736  $\text{cm}^{-1}$ ; HRMS (ESI):  $m/z$  calcd for  $\text{C}_{20}\text{H}_{33}\text{NO}_2\text{SNa}$  ( $\text{M}^++\text{Na}$ ) 374.2130, found 374.2115.

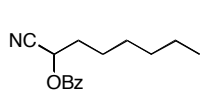

### 1-Cyanoheptyl benzoate (19)

To a solution of 2-hydroxyoctanenitrile<sup>2</sup> (0.600 g, 4.25 mmol) in  $\text{CH}_2\text{Cl}_2$  (14 mL) were added  $\text{Et}_3\text{N}$  (1.2 mL, 8.5 mmol), DMAP (5.2 mg, 42  $\mu\text{mol}$ ) and benzoyl chloride (0.60 mL, 5.1 mmol). The reaction was stirred for 1 h, then quenched with water (30 mL) and extracted with  $\text{CH}_2\text{Cl}_2$  (3 x 30 mL). The organic extracts were dried ( $\text{Na}_2\text{SO}_4$ ) and concentrated. The residue was purified by column chromatography (5%-10%  $\text{Et}_2\text{O}$  in hexanes) to give the benzoate **20** (1.04 g, 94.1%) as a colorless oil. The spectral data were consistent with those reported in the literature.<sup>2</sup>

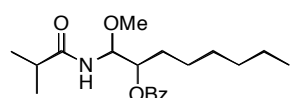

### (±)-1-(Isobutyramido)-1-methoxyoctan-2-yl benzoate (20)

The title compound was prepared by following the representative procedure with the following amounts of reagents: benzoate **19** (100 mg, 0.408 mmol),  $\text{CH}_2\text{Cl}_2$  (4.0 mL),  $\text{Cp}_2\text{Zr}(\text{H})\text{Cl}$  (158 mg, 0.612 mmol), isobutyryl chloride (52  $\mu\text{L}$ , 0.49 mmol), MeOH (0.7 mL, 17 mmol). After the reaction was complete, it was quenched with 1 N HCl (1.5 mL) and water (15 mL) and extracted with  $\text{CH}_2\text{Cl}_2$  (3 x 25 mL). The organic extracts were washed with saturated  $\text{NaHCO}_3$  (15 mL), dried ( $\text{Na}_2\text{SO}_4$ ) and concentrated. The residue was purified by column chromatography (15% - 30% EtOAc in hexanes) to give the product (90.4 mg, 63.5%) as a white solid in a 1.4:1.0 diastereomeric ratio. Further purification (15% - 30% EtOAc in hexanes) yielded pure materials. For the faster eluting product:  $^1\text{H}$  NMR (500 MHz,  $\text{CDCl}_3$ )  $\delta$  8.03-8.01 (m, 2H), 7.60-7.56 (m, 1H), 7.48-7.44 (m, 2H), 5.97 (d,  $J = 9.5$  Hz, 1H), 5.24 (dd,  $J = 9.6, 6.6$  Hz, 1H), 5.19 (ddd,  $J = 8.6, 6.6, 3.8$  Hz, 1H), 3.38 (s, 3H), 2.32 (sept,  $J = 7.0$  Hz, 1H), 1.86-1.80 (m, 1H), 1.78-1.70 (m, 1H), 1.44-1.23 (m, 7H), 1.21-1.15 (m, 1H), 1.10 (d,  $J = 7.0$  Hz, 3H), 1.00 (d,  $J = 7.0$  Hz, 3H), 0.86 (t,  $J = 7.0$  Hz, 3H);  $^{13}\text{C}$  NMR (125 MHz,  $\text{CDCl}_3$ )  $\delta$  178.0, 167.0, 133.5, 130.0, 129.9, 128.7, 81.9, 74.5, 56.3, 36.1, 31.8, 31.3, 29.3, 25.3, 22.8, 19.6, 19.5, 14.2; IR (neat) 3295, 2959, 2929, 2858, 1721, 1663, 1529, 1452, 1273, 1113, 712  $\text{cm}^{-1}$ ; HRMS (ESI):  $m/z$  calcd for  $\text{C}_{20}\text{H}_{31}\text{NO}_4\text{Na}$  ( $\text{M}^++\text{Na}$ ) 372.2151, found 372.2123. For the slower eluting product:  $^1\text{H}$  NMR (500 MHz,  $\text{CDCl}_3$ )  $\delta$  8.08 (app d,  $J = 7.3$  Hz, 2H), 7.59 (app t,  $J = 7.4$  Hz, 1H), 7.47 (app t,  $J = 7.8$  Hz, 2H), 6.01 (d,  $J = 9.6$  Hz, 1H), 5.33 (dd,  $J = 9.8, 4.0$  Hz, 1H), 5.12 (td,  $J = 8.6, 4.4$  Hz, 1H), 3.38 (s, 3H), 2.40 (sept,  $J = 6.9$  Hz, 1H), 1.82-1.73 (m, 2H), 1.44-1.26 (m, 8H), 1.18 (d,  $J = 7.0$  Hz, 3H), 1.17 (d,  $J = 7.0$  Hz, 3H), 0.87 (t,  $J = 6.7$  Hz, 3H);  $^{13}\text{C}$  NMR (125 MHz,  $\text{CDCl}_3$ )  $\delta$  177.6, 166.7, 133.4, 130.1, 130.0, 128.7, 81.0, 75.8, 56.7, 36.1, 31.8, 30.6, 29.3, 25.4, 22.7, 19.8, 19.7, 14.2; IR (neat) 3299, 2929, 2858, 1722, 1661, 1527, 1453, 1273, 1113, 712  $\text{cm}^{-1}$ ; HRMS (ESI):  $m/z$  calcd for  $\text{C}_{20}\text{H}_{31}\text{NO}_4\text{Na}$  ( $\text{M}^++\text{Na}$ ) 372.2151, found 372.2133.

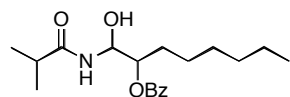

### 1-(Isobutyramido)-1-hydroxyoctan-2-yl benzoate (21)

The title compound was prepared by following the representative procedure with the following amounts of reagents: benzoate **19** (100 mg, 0.408 mmol),  $\text{CH}_2\text{Cl}_2$  (4.0 mL),  $\text{Cp}_2\text{Zr}(\text{H})\text{Cl}$  (158 mg, 0.612 mmol), isobutyryl chloride (52  $\mu\text{L}$ , 0.49 mmol). The reaction was quenched with water (15 mL) and extraction of the mixture with EtOAc (3 x 25 mL). After evaporation of the solvent, the crude product was purified by column chromatography (20% - 60% EtOAc in hexanes containing 0.5%  $\text{Et}_3\text{N}$ ) gave the product **22** (71.6 mg, 52.4%) as a colorless oil in a 3.0:1 diastereomeric ratio.  $^1\text{H}$  NMR (300 MHz,  $\text{CDCl}_3$ )  $\delta$  8.10-8.07 (m, 1.5H), 8.03-7.99 (m, 0.5H), 7.61-7.56 (m, 1H), 7.48-7.42 (m, 2H), 7.11 (d,  $J = 7.5$  Hz, 0.75H), 6.74 (d,  $J = 8.3$  Hz, 0.25H), 5.53-5.36 (m, 1H), 5.22-5.17 (m, 0.25H), 5.15-5.10 (m, 0.75H), 4.74 (br s, 0.25H), 4.52 (br s, 0.75H), 2.47-2.22 (m, 1H), 1.92-1.78 (m, 2H), 1.44-1.20 (m, 8H), 1.13 (d,  $J = 6.8$  Hz, 2.25H), 1.11 (d,  $J =$

6.8 Hz, 2.25H), 1.04 (d,  $J = 6.9$  Hz, 0.75H), 0.99 (d,  $J = 6.9$  Hz, 0.75H), 0.85 (t,  $J = 7.0$  Hz, 3H);  $^{13}\text{C}$  NMR (75 MHz,  $\text{CDCl}_3$ ) (for major diastereomer)  $\delta$  178.4, 167.7, 133.6, 130.1, 128.6, 76.2, 75.0, 35.6, 31.8, 30.7, 29.2, 25.5, 22.7, 19.5, 19.3, 14.2; IR (neat) 3338, 2959, 2928, 2858, 1720, 1657, 1530, 1451, 1274, 1119, 1070, 711  $\text{cm}^{-1}$ ; HRMS (EI):  $m/z$  calcd for  $\text{C}_{19}\text{H}_{28}\text{NO}_3$  ( $\text{M}^+ - \text{OH}$ ) 318.2069, found 318.2064.

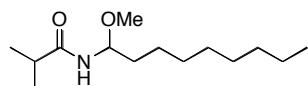

#### ***N*-(1-Methoxynonyl)isobutyramide (23)**

The title compound was prepared by following the representative procedure with the following amounts of reagents: octyl cyanide (84 mg, 0.60 mmol), THF (6.0 mL),  $\text{Cp}_2\text{Zr}(\text{H})\text{Cl}$  (194 mg, 0.754 mmol). The hydrozirconation reaction was stirred for 30 min, then cooled to 0 °C and isobutyryl chloride (95  $\mu\text{L}$ , 0.90 mmol) was added dropwise. The reaction was stirred for 10 min at 0 °C and MeOH (0.73 mL, 18 mmol) was added dropwise. The reaction was stirred at 0 °C for 15 min, then quenched with a solution of  $\text{Et}_3\text{N}$  (0.25 mL) in water (15 mL) and extracted with  $\text{CH}_2\text{Cl}_2$  (4 x 20 mL). The combined organic extracts were dried ( $\text{Na}_2\text{SO}_4$ ) and concentrated in vacuo. The residue was purified by column chromatography (15% - 25% EtOAc in hexanes containing 0.5%  $\text{Et}_3\text{N}$ ) to give the title product (91.7 mg, 62.3%) as a white solid:  $^1\text{H}$  NMR (300 MHz,  $\text{CDCl}_3$ )  $\delta$  5.66 (d,  $J = 9.5$  Hz, 1H), 5.10 (td,  $J = 9.8, 6.1$  Hz, 1H), 3.31 (s, 3H), 2.37 (sept,  $J = 6.9$  Hz, 1H), 1.66-1.59 (m, 1H), 1.52-1.43 (m, 1H), 1.38-1.24 (m, 12H), 1.18 (app d,  $J = 6.4$  Hz, 3H), 1.16 (app d,  $J = 6.4$  Hz, 3H), 0.86 (t,  $J = 6.9$  Hz, 3H);  $^{13}\text{C}$  NMR (75 MHz,  $\text{CDCl}_3$ )  $\delta$  177.4, 81.1, 55.9, 36.1, 35.8, 32.0, 29.6, 29.5, 29.4, 25.0, 22.8, 19.9, 19.7, 14.2; IR (neat) 3281, 2920, 2853, 1651, 1538, 1466, 1377, 1236, 1081, 929, 720  $\text{cm}^{-1}$ ; HRMS (EI):  $m/z$  calcd for  $\text{C}_{13}\text{H}_{26}\text{NO}$  ( $\text{M}^+ - \text{CH}_3\text{O}$ ) 212.2014 found 212.2010.

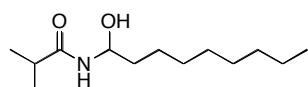

#### ***N*-(1-Hydroxynonyl)isobutyramide (24)**

The title compound was prepared by following the representative procedure with the following amounts of reagents: octyl cyanide (84.0 mg, 0.603 mmol),  $\text{CH}_2\text{Cl}_2$  (4.5 mL),  $\text{Cp}_2\text{Zr}(\text{H})\text{Cl}$  (171 mg, 0.663 mmol). After hydrozirconation was complete, a solution of isobutyryl chloride (76  $\mu\text{L}$ , 0.72 mmol) and  $\text{Et}_3\text{N}$  (0.25 mL, 1.8 mmol) in  $\text{CH}_2\text{Cl}_2$  (0.5 mL) was added dropwise at 0 °C. The reaction was stirred for 15 min at 0 °C and quenched with water (20 mL). The mixture was acidified by adding 1 N HCl to pH~1.0 and extracted with  $\text{CH}_2\text{Cl}_2$  (3 x 25 mL). The combined organic extracts were washed with saturated  $\text{NaHCO}_3$  (20 mL), dried ( $\text{Na}_2\text{SO}_4$ ) and concentrated in vacuo. The residue was purified by column chromatography (10% - 70% EtOAc in hexanes) to give acyl hemiaminal **25** (74.7 mg, 54.0%) as a white solid:  $^1\text{H}$  NMR (300 MHz,  $\text{CDCl}_3$ )  $\delta$  6.17 (br s, 1H), 5.30 (q,  $J = 6.6$  Hz, 1H), 4.27 (br s, 1H), 2.35 (sept,  $J = 6.9$  Hz, 1H), 1.73-1.61 (m, 1H), 1.59-1.48 (m, 1H), 1.40-1.26 (m, 12H), 1.15 (d,  $J = 6.9$  Hz, 3H), 1.14 (d,  $J = 6.9$  Hz, 3H), 0.87 (t,  $J = 6.9$  Hz, 3H);  $^{13}\text{C}$  NMR (75 MHz,  $\text{CDCl}_3$ )  $\delta$  178.4, 74.5, 35.7, 35.3, 32.0, 29.6, 29.5, 29.4, 25.1, 22.8, 19.6, 19.4, 14.3; IR (neat) 3298, 2934, 2854, 1653, 1540, 1462, 1231, 1095  $\text{cm}^{-1}$ ; HRMS (EI):  $m/z$  calcd for  $\text{C}_{13}\text{H}_{26}\text{NO}$  ( $\text{M}^+ - \text{OH}$ ) 212.2014 found 212.2015.

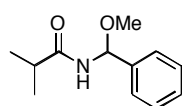

#### **(±)-*N*-(Methoxy(phenyl)methyl)isobutyramide (26)**

By following the representative procedure, reaction of benzonitrile (60.0 mg, 0.582 mmol) with  $\text{Cp}_2\text{Zr}(\text{H})\text{Cl}$  (240 mg, 0.931 mmol) in THF (5.8 mL) for 2.5 h followed by acylation with isobutyryl chloride (92  $\mu\text{L}$ , 0.87 mmol) and addition of MeOH (0.71 mL, 17 mmol) in  $\text{CH}_2\text{Cl}_2$  (0.5 mL) gave the title product (87.9 mg, 72.9%) as a white solid:  $^1\text{H}$  NMR (300 MHz,  $\text{CDCl}_3$ )  $\delta$  7.42-7.30 (m, 5H), 6.14 (d,  $J = 9.4$  Hz, 1H), 6.02 (d,  $J = 8.8$  Hz, 1H), 3.45 (s, 3H), 2.40 (sept,  $J = 6.9$  Hz, 1H), 1.21 (d,  $J = 6.9$

Hz, 3H), 1.18 (d,  $J = 6.9$  Hz, 3H);  $^{13}\text{C}$  NMR (75 MHz,  $\text{CDCl}_3$ )  $\delta$  177.4, 139.6, 128.8, 128.6, 126.0, 81.3, 56.1, 36.0, 19.8, 19.6; IR (neat) 3286, 2967, 1653, 1535, 1451, 1230, 1099, 1046, 951, 746  $\text{cm}^{-1}$ ; HRMS (EI):  $m/z$  calcd for  $\text{C}_{11}\text{H}_{14}\text{NO}_2$  ( $\text{M}^+ - \text{CH}_3$ ) 192.1024, found 192.1031.

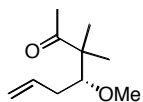

#### 4-Methoxy-3,3-dimethylhept-6-2-ene

To a solution of **27** (2.40 g, 15.4 mmol) in  $\text{CH}_2\text{Cl}_2$  (15.4 mL) cooled to  $-10$  °C was added 2,6-di-*tert*-butyl pyridine (5.12 mL, 23.0 mmol), followed by methyl trifluoromethanesulfonate (2.26 mL, 19.9 mmol). The reaction mixture was stirred at  $-10$  °C for 10 minutes then subsequently warmed to room temperature. After 48 hours  $\text{H}_2\text{O}$  (10 mL) was added and the reaction mixture was diluted with  $\text{CH}_2\text{Cl}_2$  (15 mL). The reaction mixture was subsequently extracted with  $\text{CH}_2\text{Cl}_2$  (3 x 10 mL). The organic layers were combined, washed with satd.  $\text{NaHCO}_3$  (aq) (15 mL) and brine (15 mL), then dried ( $\text{Na}_2\text{SO}_4$ ) and filtered. After careful concentration under reduced pressure, the crude residue was purified via flash column chromatography ( $\text{CH}_2\text{Cl}_2$ ) to afford the desired product as a colorless oil (2.12 g, 81% yield):  $^1\text{H}$  NMR (300 MHz,  $\text{CDCl}_3$ )  $\delta$  5.96-5.82 (m, 1H), 5.15-5.08 (m, 1H), 5.06-5.03 (m, 1H), 3.43 (dd,  $J = 6.5, 5.5$  Hz, 1H), 3.39 (s, 3H), 2.21-2.25 (m, 2H), 2.17 (s, 3H), 1.16 (s, 3H), 1.09 (s, 3H);  $^{13}\text{C}$  NMR ( $\text{CDCl}_3$ , 75 MHz)  $\delta$  212.9, 136.0, 116.4, 86.0, 59.9, 52.4, 36.7, 26.5, 10.9, 20.2; IR (neat) 2977, 2827, 1704, 1469, 1100  $\text{cm}^{-1}$ .

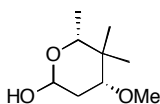

#### 4-Methoxy-5,5,6-trimethyl-2H-tetrahydropyran-2-ol

To a solution of the ketone (4.46 g, 26.2 mmol) in  $\text{CH}_2\text{Cl}_2$  (262 mL) at  $-78$  °C was slowly added dimethylaluminum chloride (65.5 mL, 1M in hexanes). After 5 minutes, tributyltin hydride (7.6 g, 28.8 mmol) was slowly added at  $-78$  °C. After one hour, satd.  $\text{NaHCO}_3$  (aq) (60 mL) was added and the reaction was warmed to room temperature. The reaction mixture was extracted with  $\text{CH}_2\text{Cl}_2$  (3 x 50 mL). The organic layers were combined, washed with brine (150 mL), dried ( $\text{Na}_2\text{SO}_4$ ), and filtered. After concentration under reduced pressure, the crude residue was purified via flash column chromatography (20%  $\text{Et}_2\text{O}$  in pentane) to afford the desired product containing tin impurities. The material was used without further purification.

To a solution of crude **32** in  $\text{CH}_2\text{Cl}_2$  (50.0 mL) at  $-78$  °C was bubbled  $\text{O}_3$ . After 20 minutes,  $\text{N}_2$  was bubbled through the deep blue solution for 10 minutes, followed by addition of  $\text{PPh}_3$  (6.43 g, 24.5 mmol) at  $-78$  °C. The reaction was subsequently warmed to room temperature. After 40 minutes, the reaction mixture was concentrated under reduced pressure and purified via column chromatography (40%  $\text{Et}_2\text{O}$  in pentane) to afford the desired product as colorless solid (2.2 g, 48% yield over 2 steps):  $^1\text{H}$  NMR (300 MHz,  $\text{CDCl}_3$ )  $\delta$  5.36 (d,  $J=3.3$  Hz, 0.70H), 4.7 (d,  $J=9$  Hz, 0.30H), 4.26 (br s, 0.40 H), 3.87 (q,  $J=6.3$  Hz, 1H), 3.49 (br s, 1H), 3.34 (s, 3H), 3.26 (m, 0.80H), 2.85 (m, 0.20), 2.18 (m, 0.31H), 2.02 (dd,  $J=4.5, 12.9$  Hz, 0.69H), 1.57 (m, 1H), 1.41 (m, 0.80H), 1.12 (d,  $J=6.3\text{Hz}$ , 0.68H), 1.05 (d,  $J=6.3$  Hz, 2.32H), 0.92 (s, 2.32H), 0.89 (s, 0.68H), 0.84 (s, 0.68H), 0.82 (s, 2.32 H);  $^{13}\text{C}$  NMR ( $\text{CDCl}_3$ , 75 MHz)  $\delta$  94.6, 92.3, 83.6, 80.0, 76.5, 71.3, 57.4, 57.2, 39.0, 38.2, 34.1, 31.0, 22.6, 22.5, 14.3, 12.4, 11.55; IR (neat): 3404, 2976, 2942, 1470, 1384, 1266, 1100  $\text{cm}^{-1}$ .

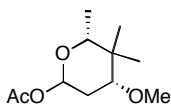

#### Acetic acid 4-Methoxy-5,5,6-trimethyl-2H-tetrahydropyran-2-yl ester

To a solution of the tetrahydropyranol (1.00 g, 5.74 mmol) in  $\text{CH}_2\text{Cl}_2$  (12 mL) and pyridine (24 mL) at  $0$  °C was added acetic anhydride (1.1 mL, 12 mmol) followed by DMAP (0.15 g, 1.2 mmol), and the reaction was warmed to room temperature. After 30 minutes,  $\text{H}_2\text{O}$  (20 ml) was added, and the reaction mixture was extracted with  $\text{CH}_2\text{Cl}_2$  (3 x 30 mL). The organic layers were combined and washed with satd.  $\text{CuSO}_4$  (aq) (5 x 30 mL) followed by brine (30 mL). The organic extracts were dried ( $\text{Na}_2\text{SO}_4$ ), filtered and

concentrated under reduced pressure. The crude residue was purified via flash chromatography (30% Et<sub>2</sub>O in pentane) to afford the desired product (0.94 g, 75% yield): <sup>1</sup>H NMR (300 MHz, CDCl<sub>3</sub>) δ 6.19 (d, *J* = 3.3 Hz, 0.77H), 5.60 (d, *J* = 9.6 Hz, 0.41 H), 3.66 (q, *J* = 6.3 Hz, 1H), 3.31 (s, 3H), 3.25-3.12 (m, 0.77H), 2.91-2.86 (m, 0.23H), 2.13 (s, 3H), 2.13-1.96 (m, 1H), 1.70-1.44 (m, 1H), 1.11 (d, *J* = 6.3 Hz, 1.1H), 1.04 (d, *J* = 6.3 Hz, 1.9H), 0.91 (s, 1.9H), 0.87 (s, 1.1H), 0.83 (s, 1.1H), 0.81 (s, 1.9H); <sup>13</sup>C NMR (CDCl<sub>3</sub>, 75 MHz) δ 169.6, 169.2, 92.9, 92.7, 84.2, 83.2, 80.0, 77.3, 74.0, 57.2, 38.5, 38.2, 31.3, 29.4, 22.5, 22.4, 21.1, 21.0, 14.3, 14.2, 12.3, 11.6; IR (neat): 2980, 2253, 1745, 1469 cm<sup>-1</sup>.

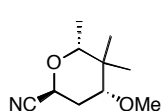

**(±)-(2S,4R,6R)-Tetrahydro-4-methoxy-5,5,6-trimethyl-2H-pyran-2-carbonitrile (29)**

To a solution of the tetrahydropyranyl acetate (0.300 g, 1.39 mmol) in CH<sub>2</sub>Cl<sub>2</sub> (9.30 mL) cooled to -78 °C was added TMSCN (0.55 mL, 4.16 mmol) followed by BF<sub>3</sub>·OEt<sub>2</sub> (0.21 mL, 1.67 mmol). The reaction was stirred at -78 °C for 10 minutes, and then warmed to -42 °C. After 45 minutes, the reaction mixture was poured into a 0 °C solution of pH 7 buffer and CH<sub>2</sub>Cl<sub>2</sub> (20 mL, 1:1, pH 7 buffer to CH<sub>2</sub>Cl<sub>2</sub>) and subsequently warmed to room temperature. The reaction mixture was extracted with CH<sub>2</sub>Cl<sub>2</sub> (3 x 10 mL), and the combined organic layers were washed with brine (20 mL), dried (Na<sub>2</sub>SO<sub>4</sub>), and filtered. The organic extracts were concentrated under reduced pressure to afford the desired product as a colorless solid (0.22 g, 85% yield). <sup>1</sup>H NMR (300 MHz, CDCl<sub>3</sub>) δ 4.90 (dd, *J* = 6.0, 1.2 Hz, 1H), 3.63 (q, *J* = 6.3 Hz, 1H), 3.37 (s, 3H), 3.17 (dd, *J* = 11.7, 4.5 Hz, 1H), 2.06 (ddd, *J* = 13.5, 4.5, 1.4 Hz, 1H), 1.84 (ddd, *J* = 13.4, 11.8, 6.1 Hz, 1H), 1.12 (d, *J* = 6.3 Hz, 3H), 0.96 (s, 3H), 0.83 (s, 3H); <sup>13</sup>C NMR (75 MHz, CDCl<sub>3</sub>) δ 118.0, 81.4, 78.0, 64.2, 57.8, 39.4, 29.3, 22.6, 14.6, 12.2; IR (neat) 2980, 2941, 2874, 1470, 1450, 1391, 1164, 1104, 954, 867, 718 cm<sup>-1</sup>; HRMS (EI): *m/z* calcd for C<sub>10</sub>H<sub>17</sub>NO<sub>2</sub> (M<sup>+</sup>) 183.1259, found 183.1255.

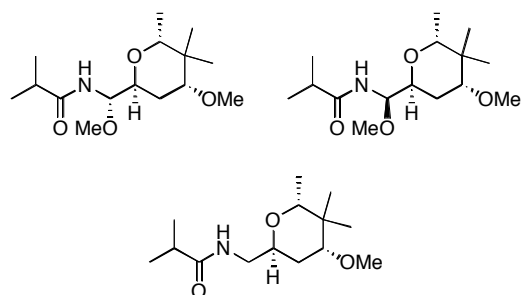

**(±)-N-((S)-((2S,4R,6R)-Tetrahydro-4-methoxy-5,5,6-trimethyl-2H-pyran-2-yl)(methoxy)methyl)isobutyramide (30), (±)-N-((R)-((2S,4R,6R)-Tetrahydro-4-methoxy-5,5,6-trimethyl-2H-pyran-2-yl)(methoxy)methyl)isobutyramide (31) and (±)-N-(((2S,4R,6R)-Tetrahydro-4-methoxy-5,5,6-trimethyl-2H-pyran-2-yl)methyl)isobutyramide (32)**

To a solution of tetrahydropyranyl cyanide (50.0 mg, 0.273 mmol) in CH<sub>2</sub>Cl<sub>2</sub> (2.7 mL) was added Schwartz reagent (84.5 mg, 0.328 mmol). The mixture was stirred for 15 min, then cooled to 0 °C and isobutyryl chloride (40 μL, 0.38 mmol) was added dropwise. The cold bath was removed and the mixture was stirred for 10 min. After that time, the flask was cooled to -78 °C and Mg(ClO<sub>4</sub>)<sub>2</sub> (61 mg, 0.27 mmol) was added in one portion. After 30 min, a pre-cooled solution (-78 °C) of MeOH (0.22 ml, 5.5 mmol) in CH<sub>2</sub>Cl<sub>2</sub> (0.5 mL) was cannulated dropwise to the reaction mixture over 5 min. After completion of addition, the reaction was stirred at -78 °C for 15 min, then quenched with saturated NaHCO<sub>3</sub> solution (15 mL) and warmed to room temperature. The biphasic mixture was extracted with CH<sub>2</sub>Cl<sub>2</sub> (3 x 20 mL) and the combined organic extracts were dried (Na<sub>2</sub>SO<sub>4</sub>) and concentrated. The residue was purified by column chromatography (20% - 70% EtOAc in hexanes containing 0.5% Et<sub>3</sub>N) to give the desired products **34** and **35** (60.2 mg, 76.8%) in a 2.3:1.0 diastereomeric ratio as a colorless oil and the over-reduction product **36** (6.8 mg, 9.7%) as a colorless oil. For **33**: <sup>1</sup>H NMR (300 MHz, CDCl<sub>3</sub>) δ 5.77 (br s, 1H), 4.05-3.97 (m, 1H), 3.48-3.39 (m, 3H), 3.32 (s, 3H), 3.03 (t, *J* = 6.4 Hz, 1H), 2.38 (sept, *J* = 6.9 Hz,

1H), 1.74-1.69 (m, 2H), 1.18-1.14 (m, 9H), 0.96 (s, 3H), 0.88 (s, 3H); <sup>13</sup>C NMR (75 MHz, CDCl<sub>3</sub>) δ 177.3, 82.0, 74.5, 69.0, 57.7, 41.0, 38.6, 35.9, 27.6, 24.5, 19.9, 19.8, 15.6, 15.5; IR (neat) 3305, 2970, 2933, 2874, 1651, 1548, 1468, 1386, 1243, 1103 cm<sup>-1</sup>; HRMS (ESI): *m/z* calcd for C<sub>14</sub>H<sub>27</sub>NO<sub>3</sub>Na (M<sup>+</sup>+Na) 280.1889, found 280.1899. Further purification (20% - 40% EtOAc in hexanes containing 0.5% Et<sub>3</sub>N) of a mixture of **31** and **32** yielded pure diastereomers. For faster eluting product **31** (major, white solid): <sup>1</sup>H NMR (500 MHz, CDCl<sub>3</sub>) δ 6.01 (d, *J* = 9.0 Hz, 1H), 5.26 (dd, *J* = 9.5, 6.5 Hz, 1H), 3.84-3.80 (m, 1H), 3.39 (s, 3H), 3.36 (q, *J* = 6.5 Hz, 1H), 3.33 (s, 3H), 3.04 (dd, *J* = 8.6, 4.1 Hz, 1H), 2.44 (sept, *J* = 6.9 Hz, 1H), 1.92 (td, *J* = 13.7, 4.5 Hz, 1H), 1.66 (ddd, *J* = 13.8, 8.6, 5.2 Hz, 1H), 1.20 (d, *J* = 6.9 Hz, 3H), 1.19 (d, *J* = 6.9 Hz, 3H), 1.10 (d, *J* = 6.6 Hz, 3H), 0.94 (s, 3H), 0.86 (s, 3H); <sup>13</sup>C NMR (125 MHz, CDCl<sub>3</sub>) δ 178.2, 82.0, 80.0, 76.2, 70.9, 57.7, 56.4, 38.2, 36.2, 26.0, 24.5, 19.9, 19.8, 16.1, 15.3; IR (neat) 3300, 2972, 2938, 1659, 1536, 1468, 1387, 1103 cm<sup>-1</sup>; HRMS (ESI): *m/z* calcd for C<sub>15</sub>H<sub>29</sub>NO<sub>4</sub>Na (M<sup>+</sup>+Na) 310.1994, found 310.1985. For slower eluting product **35** (minor, colorless oil): <sup>1</sup>H NMR (300 MHz, CDCl<sub>3</sub>) δ 6.26 (d, *J* = 9.3 Hz, 1H), 5.16 (dd, *J* = 9.6, 3.9 Hz, 1H), 3.83-3.78 (m, 1H), 3.67 (q, *J* = 6.6 Hz, 1H), 3.38 (s, 3H), 3.31 (s, 3H), 3.18 (dd, *J* = 7.0, 3.8 Hz, 1H), 2.42 (sept, *J* = 6.9 Hz, 1H), 1.96 (ddd, *J* = 13.7, 6.6, 3.9 Hz, 1H), 1.71-1.63 (m, 1H), 1.22-1.17 (m, 9H), 1.00 (s, 3H), 0.88 (s, 3H); <sup>13</sup>C NMR (75 MHz, CDCl<sub>3</sub>) δ 177.5, 82.4, 81.7, 70.3, 57.8, 56.7, 38.0, 36.1, 26.3, 25.4, 19.9, 19.7, 17.6, 15.6; IR (neat) 3293, 2970, 2934, 1658, 1531, 1468, 1387, 1170, 1102 cm<sup>-1</sup>; HRMS (ESI): *m/z* calcd for C<sub>15</sub>H<sub>29</sub>NO<sub>4</sub>Na (M<sup>+</sup>+Na) 310.1994, found 310.2002.

(1) Torii, S.; Inokuchi, T.; Takagishi, S.; Horike, H.; Kuroda, H.; Uneyama, K. *Bull. Chem. Soc. Jpn.* **1987**, *60*, 2173.

(2) Watahiki, T.; Ohba, S.; Oriyama, T. *Org. Lett.* **2003**, *5*, 2679.



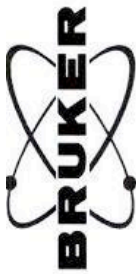

spot\_1

Current Data Parameters  
 NAME SW05190706  
 EXPNO 1  
 PROCNO 1

F2 - Acquisition Parameters

Date\_ 20070519  
 Time 20.58  
 INSTRUM spect  
 PROBHD 5 mm DUL IH-13  
 PULPROG zg  
 TD 65536  
 SOLVENT CDCl3  
 NS 5  
 DS 2  
 SWH 6218.905 Hz  
 FIDRES 0.094893 Hz  
 AQ 5.2691445 sec  
 RG 71.8  
 DW 80.400 usec  
 DE 6.00 usec  
 TE 300.0 K  
 D1 2.0000000 sec  
 TD0 1

===== CHANNEL f1 =====  
 NUC1 1H  
 P1 9.00 usec  
 PL1 1.00 dB  
 SF01 300.3818550 MHz

F2 - Processing parameters  
 SI 32768  
 SF 300.3799996 MHz  
 WDW EM  
 SSB 0  
 LB 0.30 Hz  
 GB 0  
 PC 1.00

7.4418  
7.4014  
7.3758  
7.3498  
7.2701  
7.2392  
7.2142  
7.1898  
7.1679  
7.1415  
7.1172  
5.9147  
5.8819  
4.9054  
4.8722  
3.5884  
3.5831  
3.5662  
3.5191  
3.4911  
3.4437  
3.4170  
3.3827  
1.6357  
1.5523  
1.5264  
1.5003  
1.4781  
1.4037  
1.3876  
1.3709  
1.3044  
1.2673  
0.9641  
0.9004  
0.8773

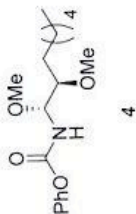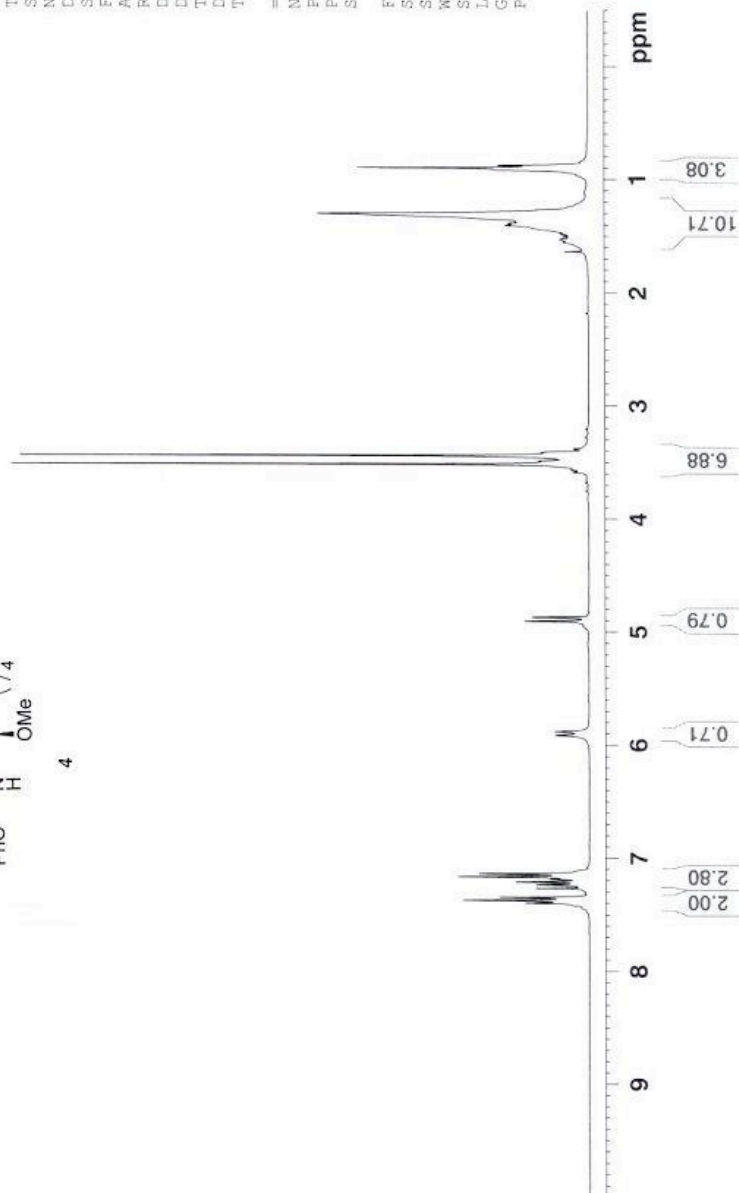

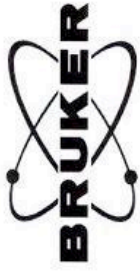

spot 1

Current Data Parameters  
 NAME SW05190707  
 EXPNO 1  
 PROCNO 1

F2 - Acquisition Parameters  
 Date\_ 20070519  
 Time 21.03  
 INSTRUM spect  
 PROBHD 5 mm DUL IH-13  
 PULPROG zgpg  
 TD 65536  
 SOLVENT CDC13  
 NS 92  
 DS 4  
 SWH 18115.941 Hz  
 FIDRES 0.276427 Hz  
 AQ 1.8088436 sec  
 RG 5792.6  
 DW 27.600 usec  
 DE 6.00 usec  
 TE 300.0 K  
 D1 10.00000000 sec  
 d11 0.03000000 sec  
 DELTA 9.89999962 sec  
 TDO 1

===== CHANNEL f1 =====  
 NUC1 13C  
 P1 9.00 usec  
 PL1 1.80 dB  
 SFO1 75.5381641 MHz  
 ===== CHANNEL f2 =====  
 CPDPRG2 waltz16  
 NUC2 1H  
 PCPD2 92.00 usec  
 PL2 0.00 dB  
 PL12 20.00 dB  
 PL13 20.00 dB  
 SFO2 300.3812015 MHz

F2 - Processing parameters  
 SI 65536  
 SF 75.5305960 MHz  
 WDW EM  
 SSB 0  
 LB 0  
 GB 0  
 PC 1.40

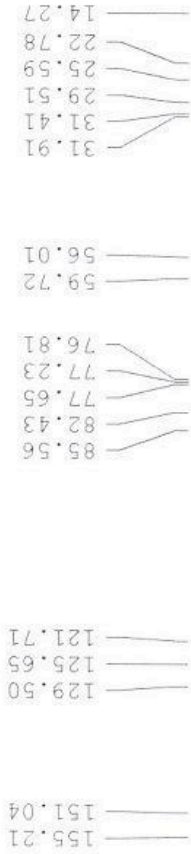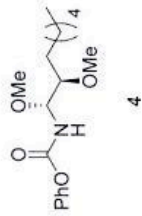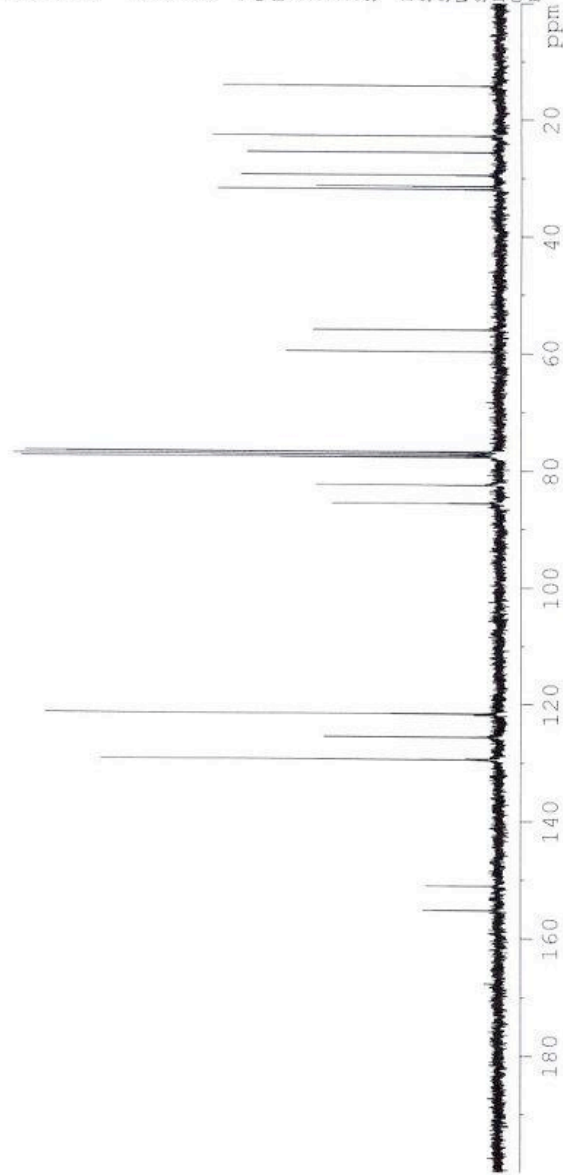

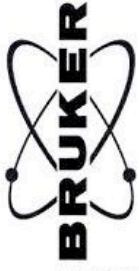

spot 2 in acyl azide

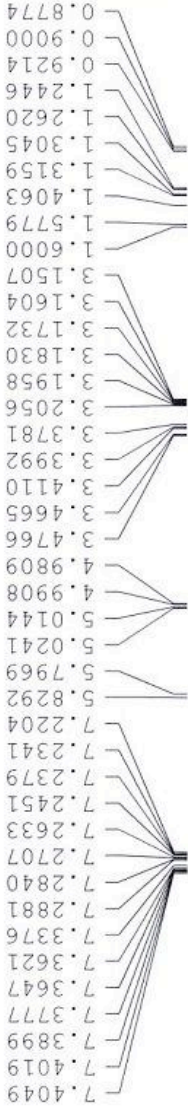

Current Data Parameters  
 NAME SW05070707  
 EXPNO 1  
 PROCNO 1

F2 - Acquisition Parameters  
 Date\_ 20070507  
 Time 20.58  
 INSTRUM spect  
 PROBHD 5 mm Dual 13C/  
 PULPROG zg  
 TD 32768  
 SOLVENT CDCl3  
 NS 14  
 DS 2  
 SWH 6172.839 Hz  
 FIDRES 0.186380 Hz  
 AQ 2.6542580 sec  
 RG 645.1  
 DW 81.000 usec  
 DE 6.00 usec  
 TE 300.0 K  
 D1 2.00000000 sec  
 TDO 1

===== CHANNEL f1 =====  
 NUC1 1H  
 P1 5.00 usec  
 PL1 0.00 dB  
 SF01 300.1318530 MHz

F2 - Processing parameters  
 SI 16384  
 SF 300.1300032 MHz  
 WDW EM  
 SSB 0  
 LB 0.10 Hz  
 GB 0  
 PC 1.00

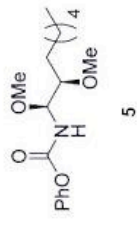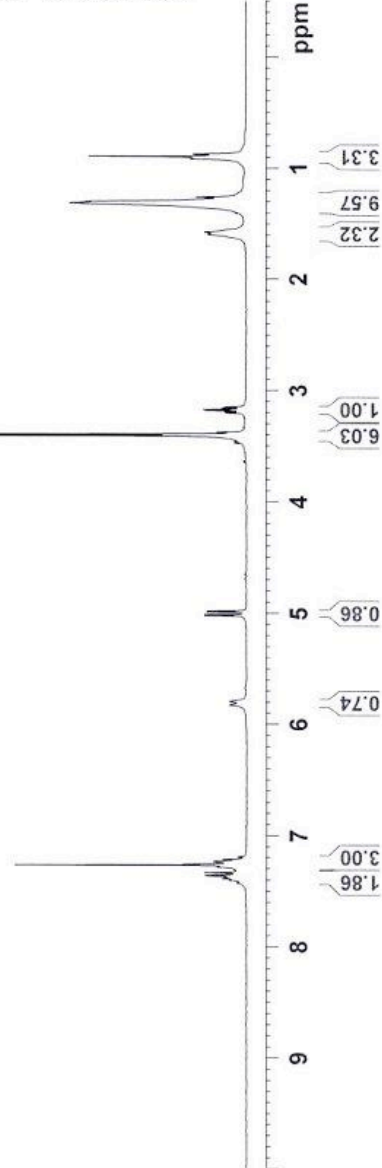

spot 2

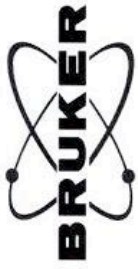

Current Data Parameters  
NAME SW05190705  
EXPNO 1  
PROCNO 1

F2 - Acquisition Parameters  
Date\_ 20070519  
Time 20.19  
INSTRUM spect  
PROBHD 5 mm DUL 1H-13  
PULPROG zgpg9  
TD 65536  
SOLVENT CDCl3  
NS 156  
DS 4  
SWH 18115.941 Hz  
FIDRES 0.276427 Hz  
AQ 1.8088436 sec  
RG 11585.2  
DW 27.600 usec  
DE 6.00 usec  
TE 300.0 K  
D1 10.00000000 sec  
d11 0.03000000 sec  
DELTA 9.89999962 sec  
TD0 1

===== CHANNEL f1 =====  
NUC1 13C  
P1 9.00 usec  
PL1 1.80 dB  
SFO1 75.5381641 MHz

===== CHANNEL f2 =====  
CDEPRG2 waitz16  
NUC2 1H  
PCPD2 92.00 usec  
PL2 0.00 dB  
PL12 20.00 dB  
PL13 20.00 dB  
SFO2 300.3812015 MHz

F2 - Processing parameters  
SI 65536  
SF 75.5305951 MHz  
WDW EM  
SSB 0  
GB 0  
PC 1.00 Hz  
Fc 2.00

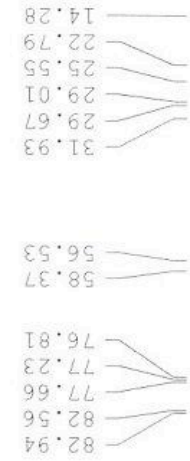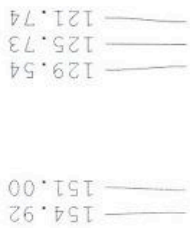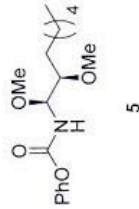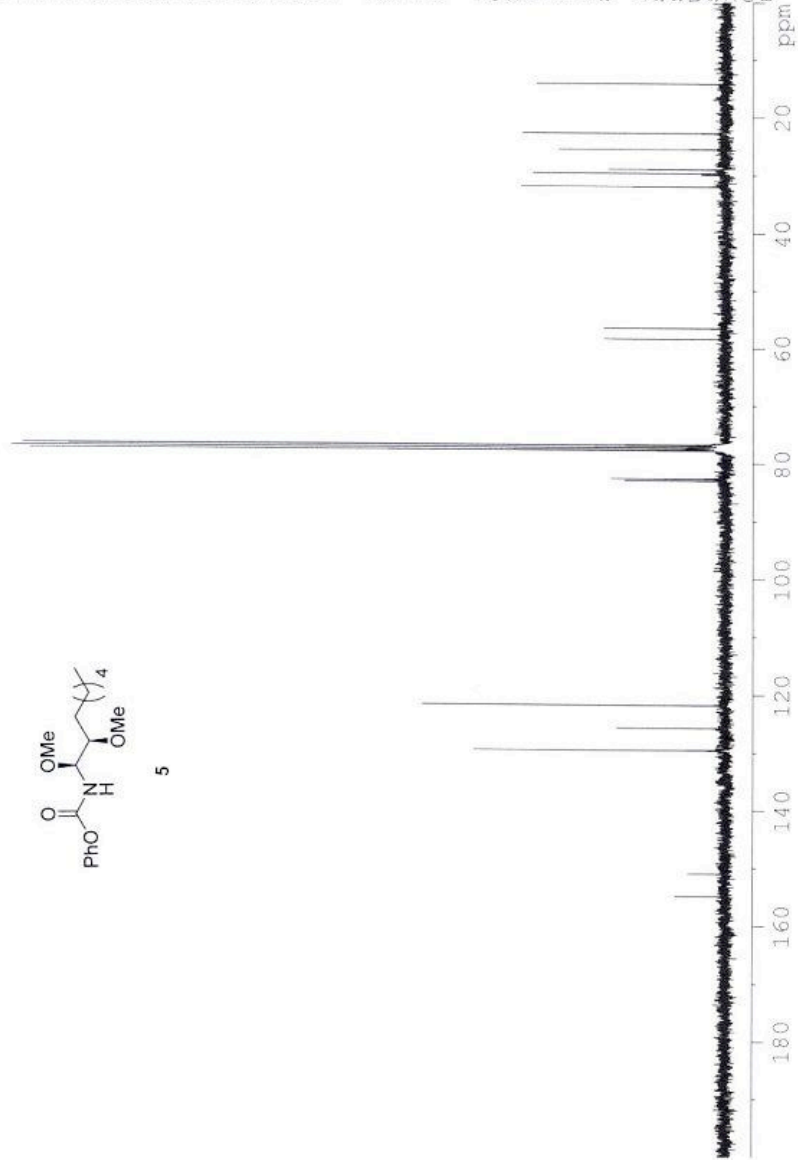

Ethoxy cyanide

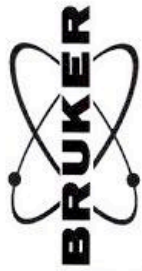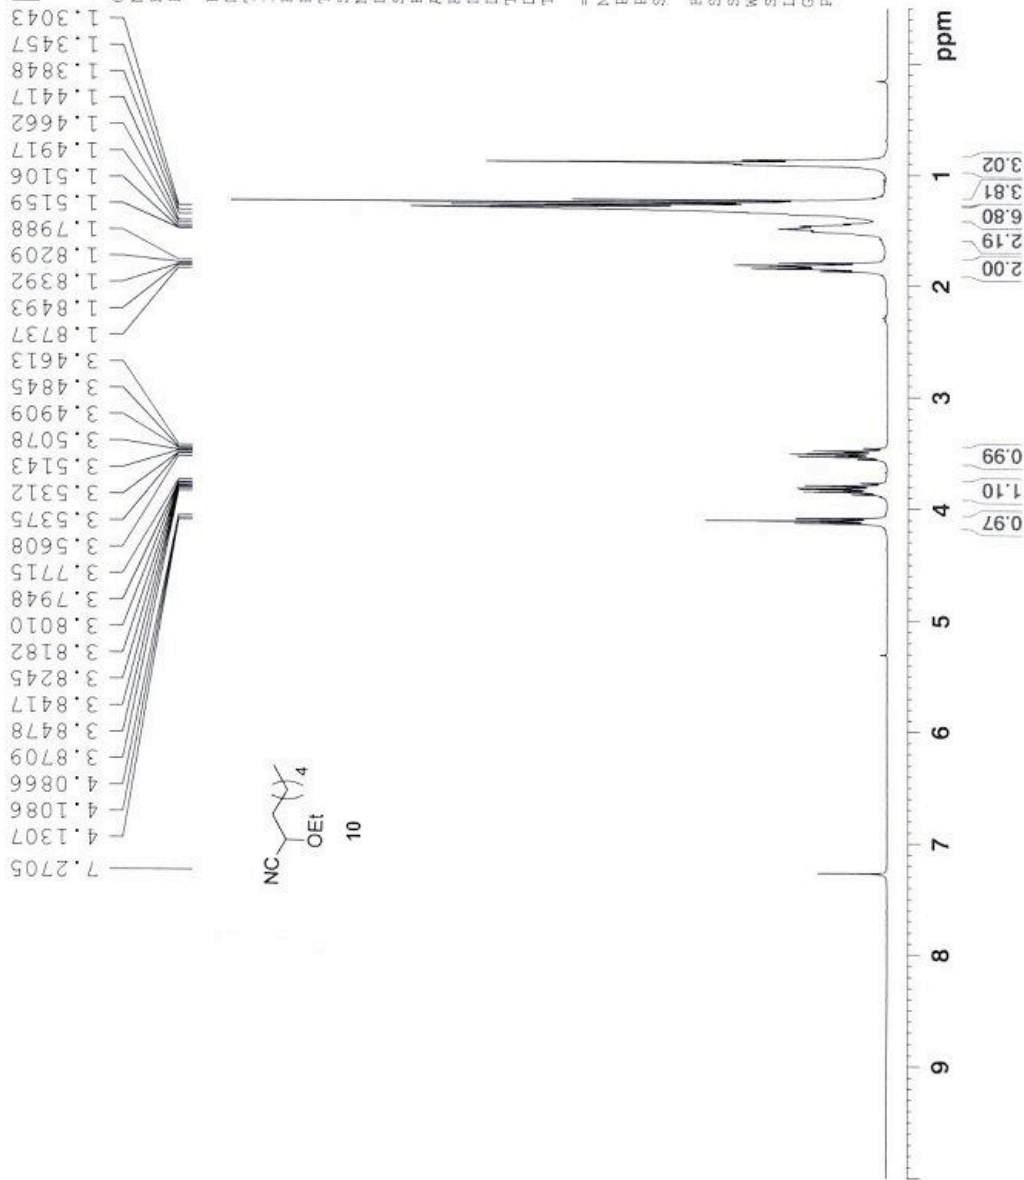

Ethoxy cyanide

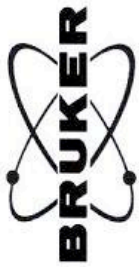

Current Data Parameters  
 NAME SW02050701  
 EXPNO 1  
 PROCNO 1

F2 - Acquisition Parameters  
 Date\_ 20070205  
 Time 11.05  
 INSTRUM spect  
 PROHD 5 mm DUL 1H-13  
 PULPROG zgpg30  
 TD 65536  
 SOLVENT CDCl3  
 NS 29  
 DS 4  
 SWH 18115.941 Hz  
 FIDRES 0.276427 Hz  
 AQ 1.8098436 sec  
 RG 8192  
 DW 27.600 usec  
 DE 6.00 usec  
 TE 300.0 K  
 D1 10.00000000 sec  
 d11 0.03000000 sec  
 DELTA 9.89999962 sec  
 TDO 1

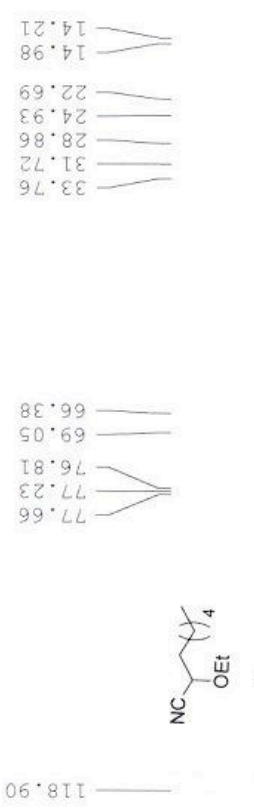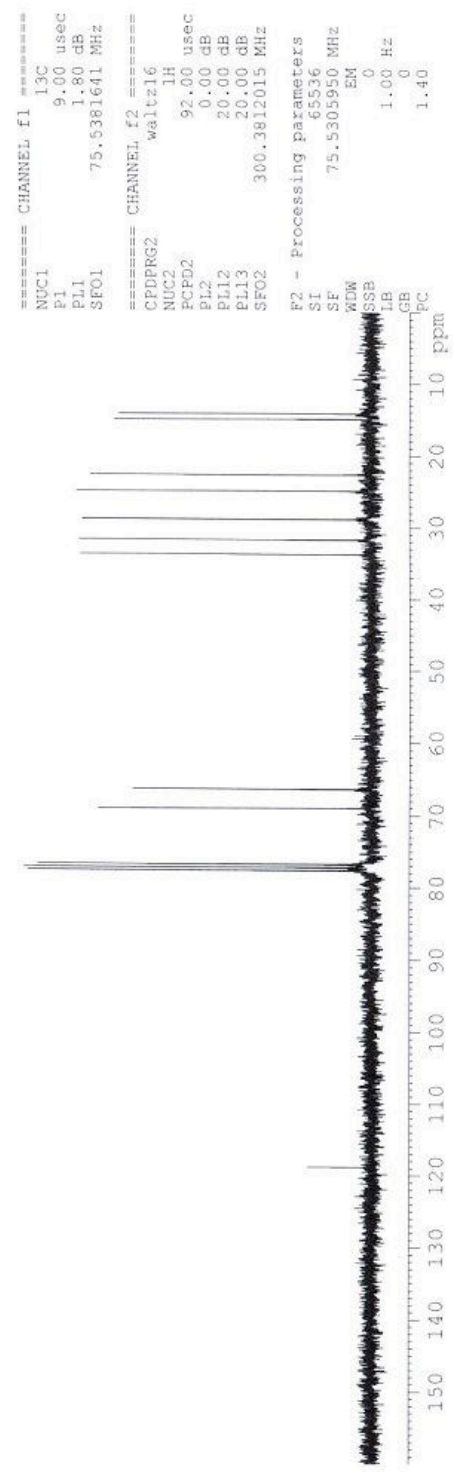



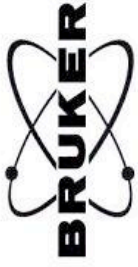

higher spot

6.2149  
6.1833  
5.0320  
5.0274  
4.9996  
4.9950  
3.7592  
3.7509  
3.7356  
3.7276  
3.7120  
3.7042  
3.5960  
3.5724  
3.5645  
3.5489  
3.5410  
3.5258  
3.5174  
3.4941  
3.4660  
3.4526  
3.4485  
3.4298  
3.3099  
3.2923  
3.2424  
2.4014  
2.3786  
1.3679  
1.3261  
1.3023  
1.2882  
1.2336  
1.1803  
1.1712  
1.1576  
1.1351  
1.0978  
1.0795  
0.8613  
0.8533  
0.8400  
0.8172

Current Data Parameters  
NAME SW01310702  
EXPNO 1  
PROCNO 1

F2 - Acquisition Parameters  
Date\_ 20070131  
Time\_ 16.44  
INSTRUM spect  
PROBHD 5 mm Dual 13C/  
PULPROG zg  
TD 32768  
SOLVENT CDCl3  
NS 6  
DS 2  
SWH 6172.839 Hz  
FIDRES 0.188380 Hz  
AQ 2.6542580 sec  
RG 40.3  
DW 81.000 usec  
DE 6.00 usec  
TE 300.0 K  
D1 2.00000000 sec  
TD0 1

CHANNEL f1  
NUC1 1H  
P1 5.00 usec  
PL1 0.00 dB  
SFO1 300.1318530 MHz

F2 - Processing parameters  
SI 16384  
SF 300.1300024 MHz  
WDW EM  
SSB 0  
LB 0.10 Hz  
GB 0  
PC 1.00

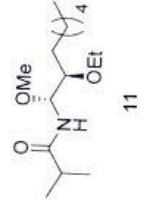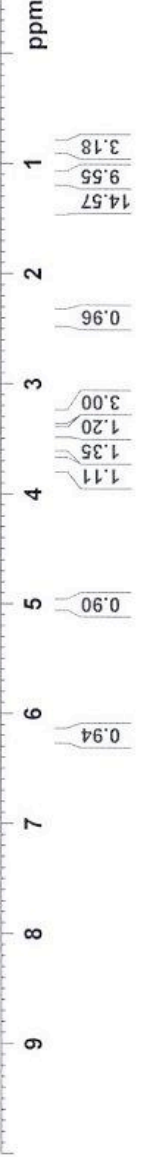

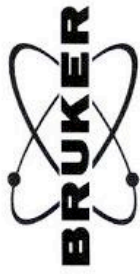

Current Data Parameters  
 NAME SW01310704  
 EXPNO 1  
 PROCNO 1

F2 - Acquisition Parameters  
 Date\_ 20070131  
 Time 19.39  
 INSTRUM spect  
 PROBHD 5 mm DUL 1H-13  
 PULPROG zgpg  
 TD 65536  
 SOLVENT CDCl3  
 NS 9  
 DS 4  
 SWH 18115.941 Hz  
 FIDRES 0.276427 Hz  
 AQ 1.6088436 sec  
 RG 6502  
 DW 27.600 usec  
 DE 6.00 usec  
 TE 300.0 K  
 D1 10.00000000 sec  
 g11 0.03000000 sec  
 DELTA 9.89999962 sec  
 TD0 1

===== CHANNEL f1 =====  
 NUC1 13C  
 P1 9.00 usec  
 PL1 1.80 dB  
 SFO1 75.5381641 MHz  
 ===== CHANNEL f2 =====  
 CPDPRG2 waltz16  
 NUC2 1H  
 PCPD2 92.00 usec  
 PL2 0.00 dB  
 PL12 20.00 dB  
 PL13 20.00 dB  
 SFO2 300.3812015 MHz

F2 - Processing parameters  
 SI 65536  
 SF 75.5305970 MHz  
 WDW EM  
 SSB 0  
 LB 1.00 Hz  
 GB 0  
 PC 1.40

higher spot

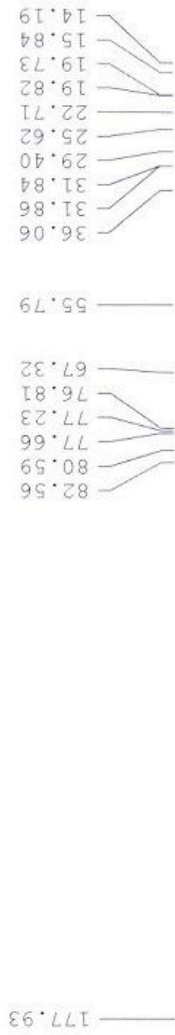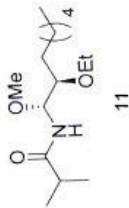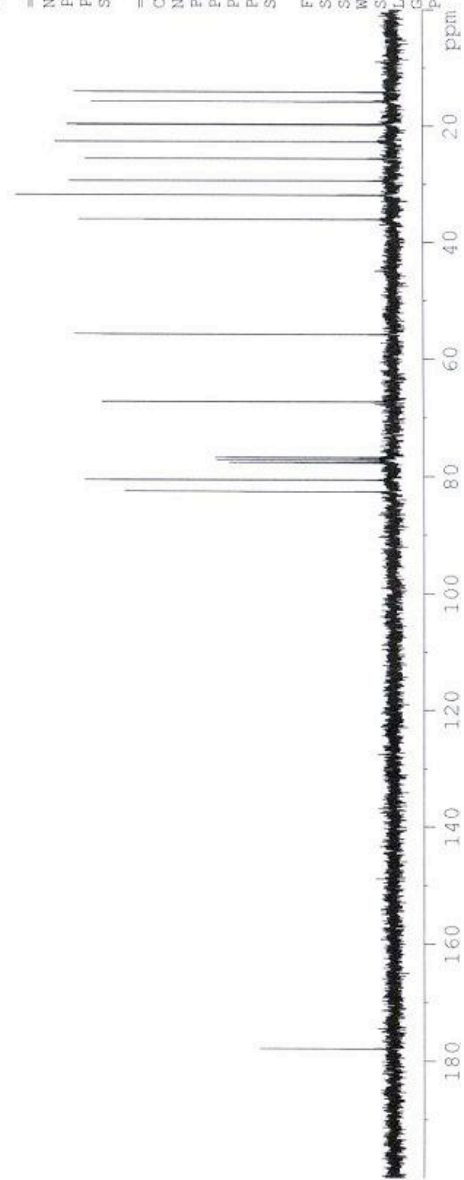



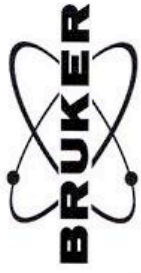

lower spot

7.2711  
6.2226  
6.1902  
5.1876  
5.1778  
5.1551  
5.1452  
3.6887  
3.6810  
3.6653  
3.6574  
3.6340  
3.5132  
3.4898  
3.4821  
3.4666  
3.4586  
3.4432  
3.4353  
3.3359  
3.3220  
3.2635  
3.2536  
3.2408  
3.2309  
3.2180  
3.2082  
2.4393  
2.4163  
2.3933  
1.6089  
1.5853  
1.2991  
1.2859  
1.2485  
1.2294  
1.2105  
1.2064  
1.1922  
1.1878  
1.1695  
0.9025  
0.8817  
0.8589

Current Data Parameters  
NAME SW01310703  
EXPNO 1  
PROCNO 1

F2 - Acquisition Parameters  
Date\_ 20070131  
Time 17.45  
INSTRUM spect  
PROBHD 5 mm Dual 13C/  
PULPROG zg  
TD 32768  
SOLVENT CDCl3  
NS 9  
DS 2  
SWH 6172.839 Hz  
FIDRES 0.188380 Hz  
AQ 2.6542580 sec  
RG 128  
DW 81.000 usec  
DE 6.00 usec  
TE 300.0 K  
D1 2.0000000 sec  
TDO 1

===== CHANNEL f1 =====  
NUC1 1H  
P1 5.00 usec  
PL1 0.00 dB  
SFO1 300.1318530 MHz

F2 - Processing parameters  
SI 16384  
SF 300.1300024 MHz  
WDW EM  
SSB 0  
LB 0.10 Hz  
GB 0  
PC 1.00

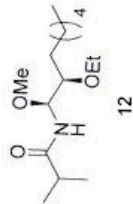

ppm

3.08  
8.59  
10.52  
2.42  
0.91  
1.08  
3.00  
1.27  
1.06  
0.90  
0.88

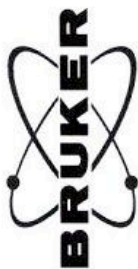

Current Data Parameters  
 NAME SW01310705  
 EXPNO 1  
 PROCNO 1

F2 - Acquisition Parameters  
 Date\_ 20070131  
 Time 19.48  
 INSTRUM spect  
 PROBHD 5 mm DUL JH-13  
 PULPROG zgpg  
 TD 65536  
 SOLVENT CDCl3  
 NS 26  
 DS 4  
 SWH 18115.941 Hz  
 FIDRES 0.276427 Hz  
 AQ 1.8088436 sec  
 RG 11385.2  
 DW 27.600 usec  
 DE 6.00 usec  
 TE 300.0 K  
 D1 10.00000000 sec  
 d11 0.03000000 sec  
 DELTA 9.8999962 sec  
 TDO 1

==== CHANNEL f1 =====  
 NUC1 13C  
 P1 9.00 usec  
 PL1 1.80 dB  
 SFO1 75.5381641 MHz  
 ===== CHANNEL f2 =====  
 CPDPRG2 waltz16  
 NUC2 1H  
 PCPD2 92.00 usec  
 PL2 0.00 dB  
 PL12 20.00 dB  
 PL13 20.00 dB  
 SFO2 300.3812015 MHz

F2 - Processing parameters  
 SI 65536  
 SF 75.5305955 MHz  
 EM 0  
 WDW EM  
 SSB 0  
 LB 1.00 Hz  
 GB 0  
 PC 1.40

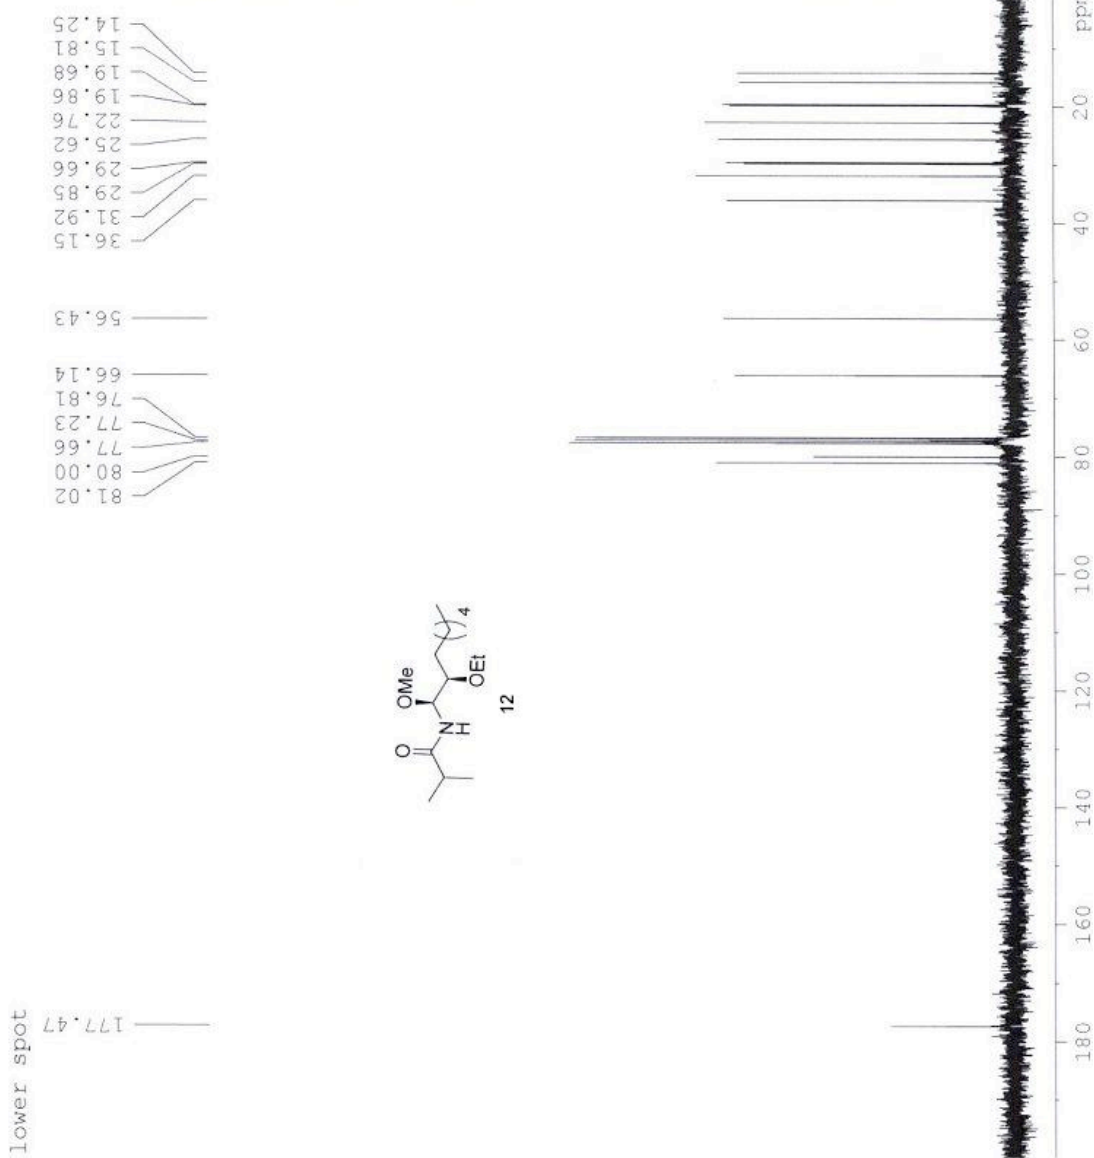

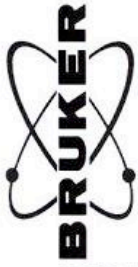

higher spot

7.2702  
7.1930  
7.1605  
5.0788  
5.0738  
5.0456  
5.0406  
4.0000  
3.9492  
3.9282  
3.8774  
3.8762  
3.7784  
3.7627  
3.7548  
3.7392  
3.7314  
3.7080  
3.5957  
3.5881  
3.5724  
3.5645  
3.5489  
3.5410  
3.4922  
3.4890  
3.4759  
3.4717  
3.4510  
3.4263  
3.4010  
3.3307  
1.3868  
1.3703  
1.3396  
1.3226  
1.3140  
1.2544  
1.2018  
1.1784  
1.1550  
0.8817  
0.8612  
0.8381

Current Data Parameters  
 NAME SK02060701  
 EXPNO 1  
 PROCNO 1

F2 - Acquisition Parameters  
 Date\_ 20070206  
 Time\_ 13.51  
 INSTRUM spect  
 PROBHD 5 mm DUL 1H-13  
 PULPROG zg  
 TD 65536  
 SOLVENT CDCl3  
 NS 4  
 DS 2  
 SMH 6218.905 Hz  
 FIDRES 0.094893 Hz  
 AQ 5.2691445 sec  
 RG 40.3  
 DW 80.400 usec  
 DE 6.00 usec  
 TE 300.0 K  
 D1 2.0000000 sec  
 TD0 1

==== CHANNEL f1 =====  
 NUC1 1H  
 P1 9.00 usec  
 PL1 1.00 dB  
 SFO1 300.3818550 MHz

F2 - Processing parameters  
 SI 32768  
 SF 300.3799995 MHz  
 WDW EM  
 SSB 0  
 LB 0.30 Hz  
 GB 0  
 PC 1.00

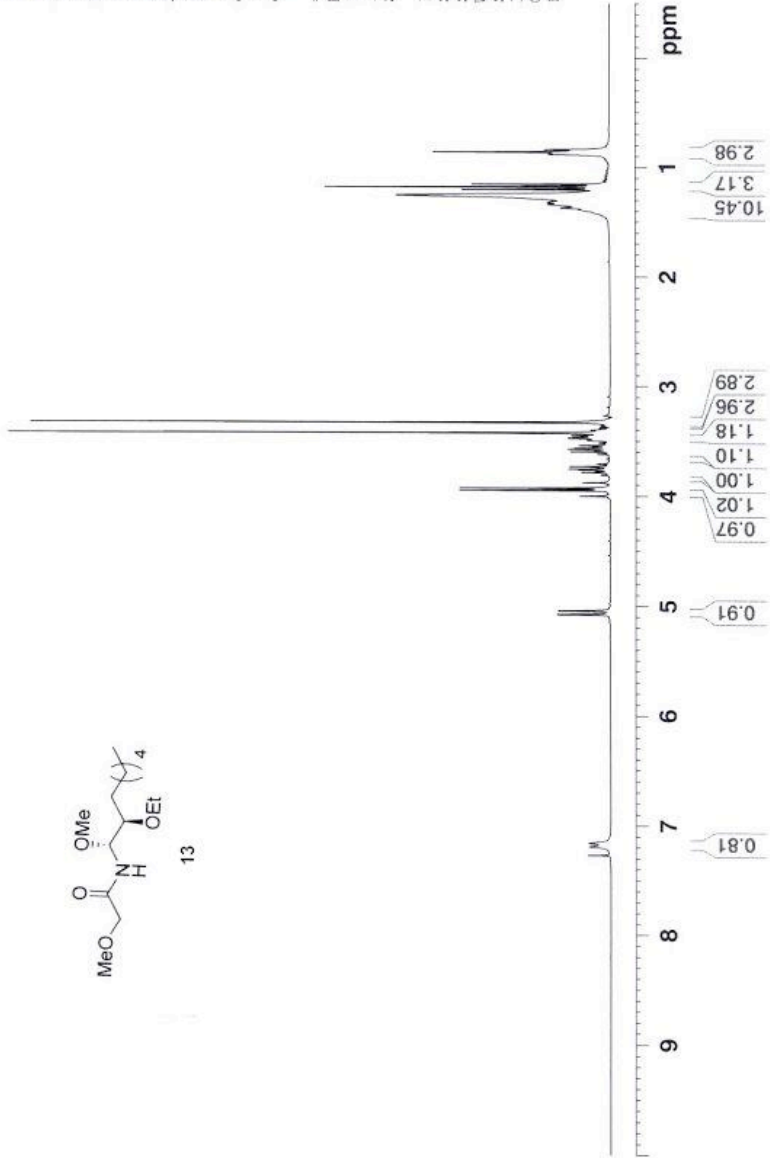

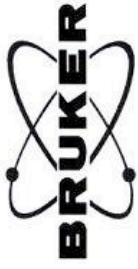

Current Data Parameters  
 NAME SW02060702  
 EXPNO 1  
 PROCNO 1

F2 - Acquisition Parameters  
 Date\_ 20070206  
 Time 13.55  
 INSTRUM spect  
 PROBHD 5 mm DUL 1H-13  
 PULPROG zgpg  
 TD 65536  
 SOLVENT CDCl3  
 NS 20  
 DS 4  
 SWH 18115.941 Hz  
 FIDRES 0.276427 Hz  
 AQ 1.8088436 sec  
 RG 4597.6  
 DM 27.600 usec  
 DE 6.00 usec  
 TE 300.0 K  
 D1 10.00000000 sec  
 d11 0.03000000 sec  
 DELTA 9.8999962 sec  
 TDO 1

===== CHANNEL f1 =====  
 NUC1 13C  
 P1 9.00 usec  
 PL1 1.80 dB  
 SFO1 75.5381641 MHz  
 ===== CHANNEL f2 =====  
 CPDPRG2 waltz16  
 NUC2 1H  
 PCPD2 92.00 usec  
 PL2 0.00 dB  
 PL12 20.00 dB  
 PL13 20.00 dB  
 SFO2 300.3812015 MHz

F2 - Processing parameters  
 SI 65536  
 SF 75.5305959 MHz  
 EM 0  
 LB 1.00 Hz  
 GB 0  
 PC 1.40

higher spot

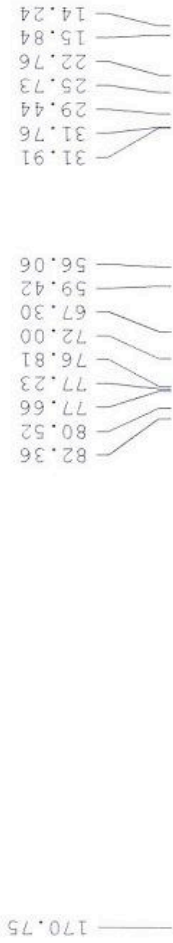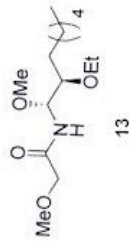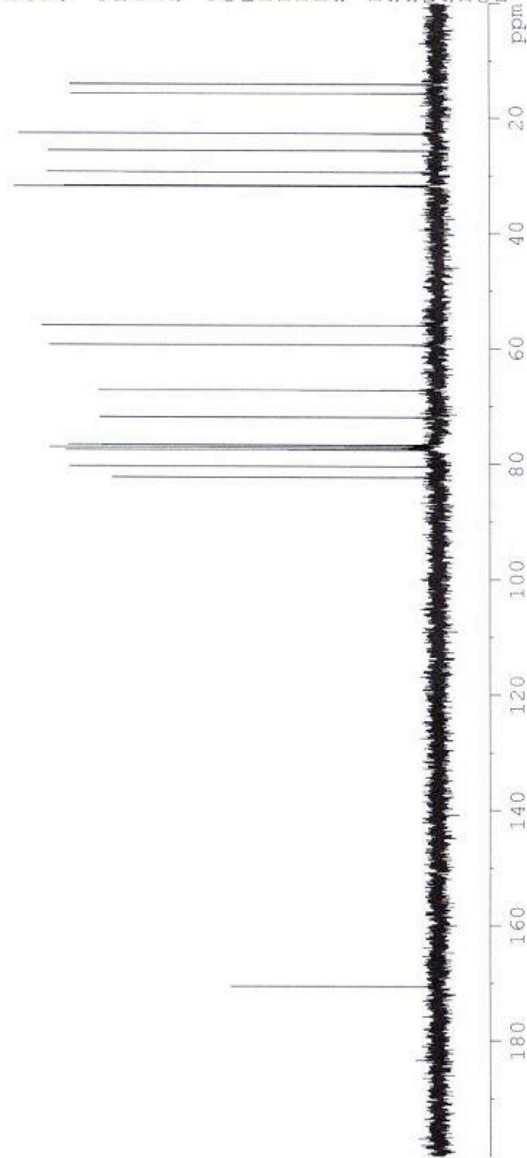

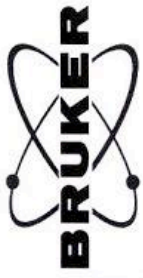

Current Data Parameters  
NAME SW02060703  
EXPNO 1  
PROCNO 1

F2 - Acquisition Parameters  
Date\_ 20070206  
Time 14.05  
INSTRUM spect  
PROBHD 5 mm DUL LH-13  
PULPROG zg  
TD 65536  
SOLVENT CDCl3  
NS 16  
DS 2  
SWH 6218.905 Hz  
FIDRES 0.094893 Hz  
AQ 5.2691445 sec  
RG 71.8  
DM 80.400 usec  
DE 6.00 usec  
TE 300.0 K  
D1 2.00000000 sec  
TD0 1

==== CHANNEL f1 =====  
NUC1 1H  
P1 9.00 usec  
PL1 1.00 dB  
SFO1 300.3818550 MHz

F2 - Processing parameters  
SI 32768  
SF 300.3799993 MHz  
WDW EM  
SSB 0  
LB 0.30 Hz  
GB 0  
PC 1.00

lower spot

7.2705  
5.2052  
5.1951  
5.1715  
5.1614  
4.0027  
3.9517  
3.9377  
3.8868  
3.8617  
3.6507  
3.6274  
3.5305  
3.5072  
3.4996  
3.4839  
3.4761  
3.4532  
3.4334  
3.4145  
3.3766  
3.3564  
3.3421  
3.2812  
3.2711  
3.2587  
3.2486  
3.2362  
1.6107  
1.6052  
1.5896  
1.5670  
1.3896  
1.3574  
1.3019  
1.2884  
1.2506  
1.2297  
1.2064  
1.1831  
0.9056  
0.8847  
0.8619

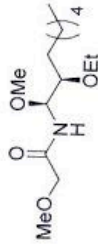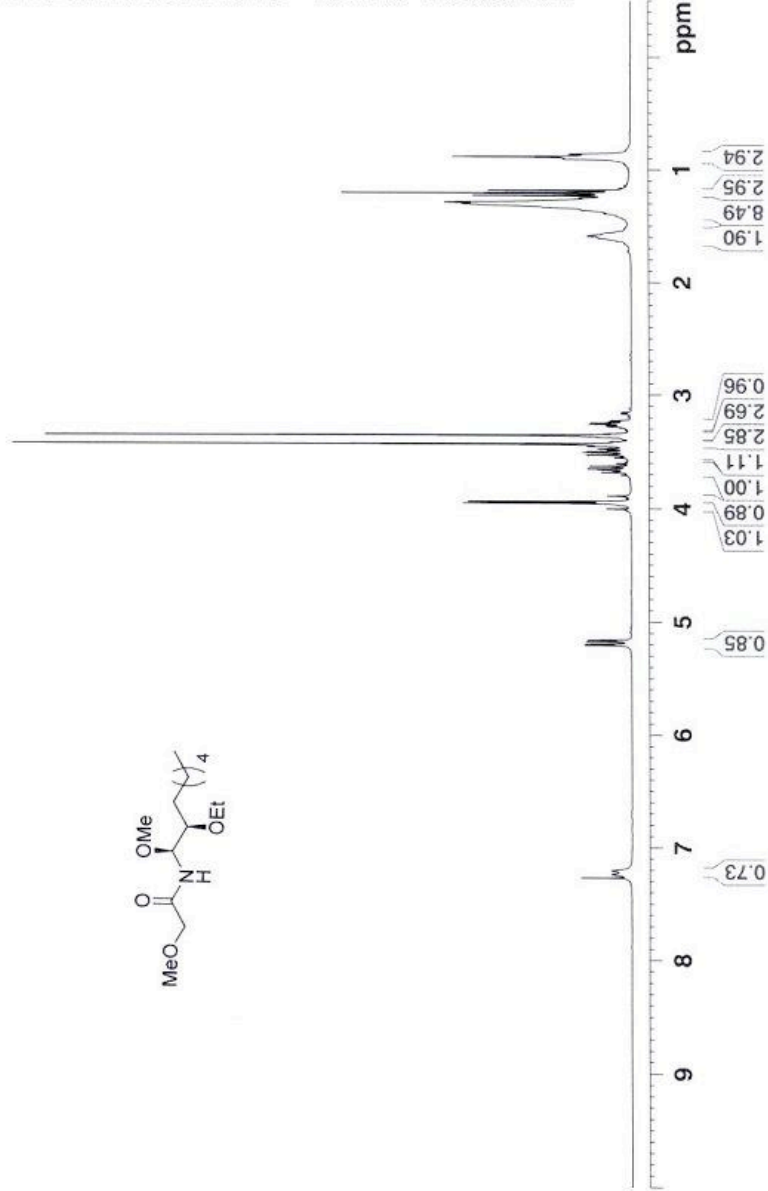

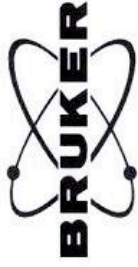

Current Data Parameters  
 NAME SW02060704  
 EXPNO 1  
 PROCNO 1

F2 - Acquisition Parameters  
 Date\_ 20070206  
 Time 14.10  
 INSTRUM spect  
 PROBHD 5 mm DUL 1H-13  
 PULPROG zgpg  
 TD 65336  
 SOLVENT CDCl3  
 NS 19  
 DS 4  
 SWH 18115.941 Hz  
 FIDRES 0.276427 Hz  
 AQ 1.8088436 sec  
 RG 5792.6  
 DW 27.600 usec  
 DE 6.00 usec  
 TE 300.0 K  
 D1 10.00000000 sec  
 d11 0.03000000 sec  
 DELTA 9.89999962 sec  
 TDO 1

===== CHANNEL f1 =====  
 NUC1 13C  
 P1 9.00 usec  
 PL1 1.80 dB  
 SFO1 75.5381641 MHz

===== CHANNEL f2 =====  
 CPDPRG2 waltz16  
 NUC2 1H  
 PCPD2 92.00 usec  
 PL2 0.00 dB  
 PL12 20.00 dB  
 PL13 20.00 dB  
 SFO2 300.3812015 MHz

F2 - Processing parameters  
 SI 65536  
 SF 75.5305955 MHz  
 EM 0  
 RDW 0  
 SSB 0  
 LB 1.00 Hz  
 GB 0  
 PC 1.40

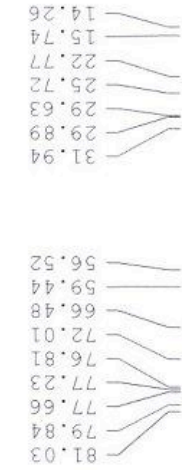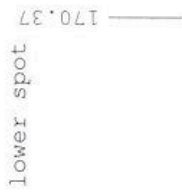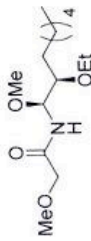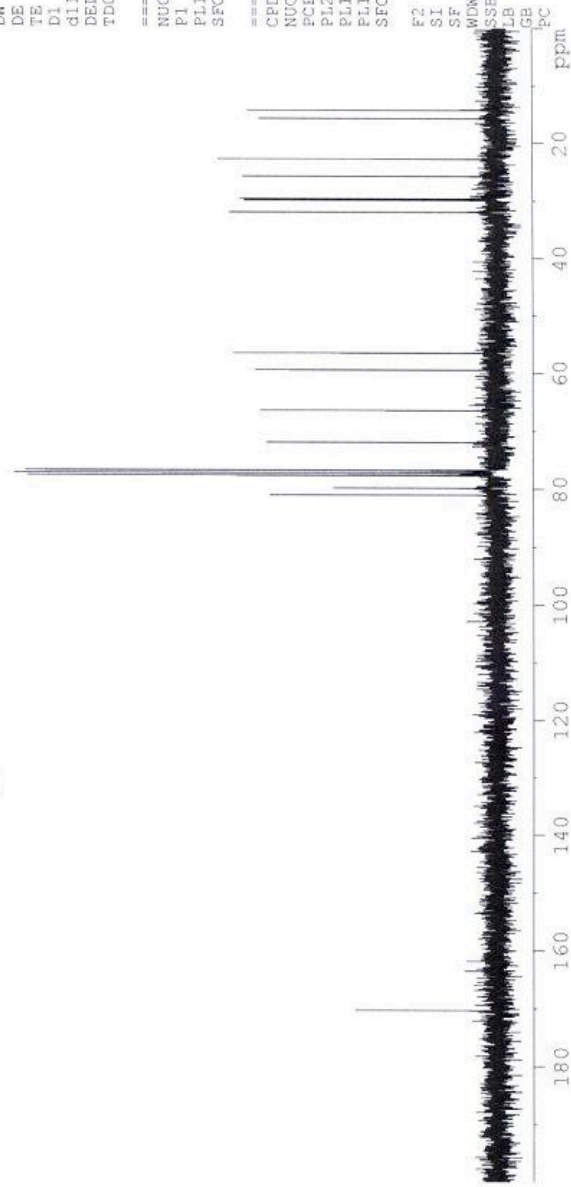



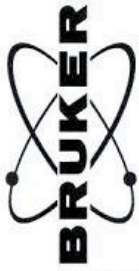

spot 1

7.3861  
7.3797  
7.3707  
7.3534  
7.3488  
7.3427  
7.3251  
7.2704  
5.6756  
5.6428  
5.1856  
5.1455  
4.8387  
4.8354  
4.8056  
4.8019  
3.7698  
3.7463  
3.7388  
3.7154  
3.6021  
3.5787  
3.5713  
3.5552  
3.5476  
3.5318  
3.5242  
3.4761  
3.4627  
3.4401  
3.3677  
1.4573  
1.3882  
1.3733  
1.3552  
1.3316  
1.2801  
1.2088  
1.1896  
1.1661  
1.1427  
0.9122  
0.8908  
0.8676

Current Data Parameters  
NAME SW05040701  
EXPNO 1  
PROCNO 1

F2 - Acquisition Parameters

Date\_ 20070504  
Time\_ 14.05  
INSTRUM spect  
PROBHD 5 mm Dual 13C/  
PULPROG zg  
TD 32768  
SOLVENT CDCl3  
NS 4  
DS 2  
SWH 6172.839 Hz  
FIDRES 0.188380 Hz  
AQ 2.6542580 sec  
RG 71.8  
DW 81.000 usec  
DE 6.00 usec  
TE 300.0 K  
D1 2.00000000 sec  
TD0 1

===== CHANNEL f1 =====  
NUC1 1H  
P1 5.00 usec  
PL1 0.00 dB  
SFO1 300.1318530 MHz

F2 - Processing parameters  
SI 16384  
SF 300.1300032 MHz  
WDW EM  
SSB 0  
LB 0.10 Hz  
GB 0  
PC 1.00

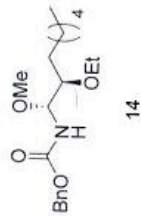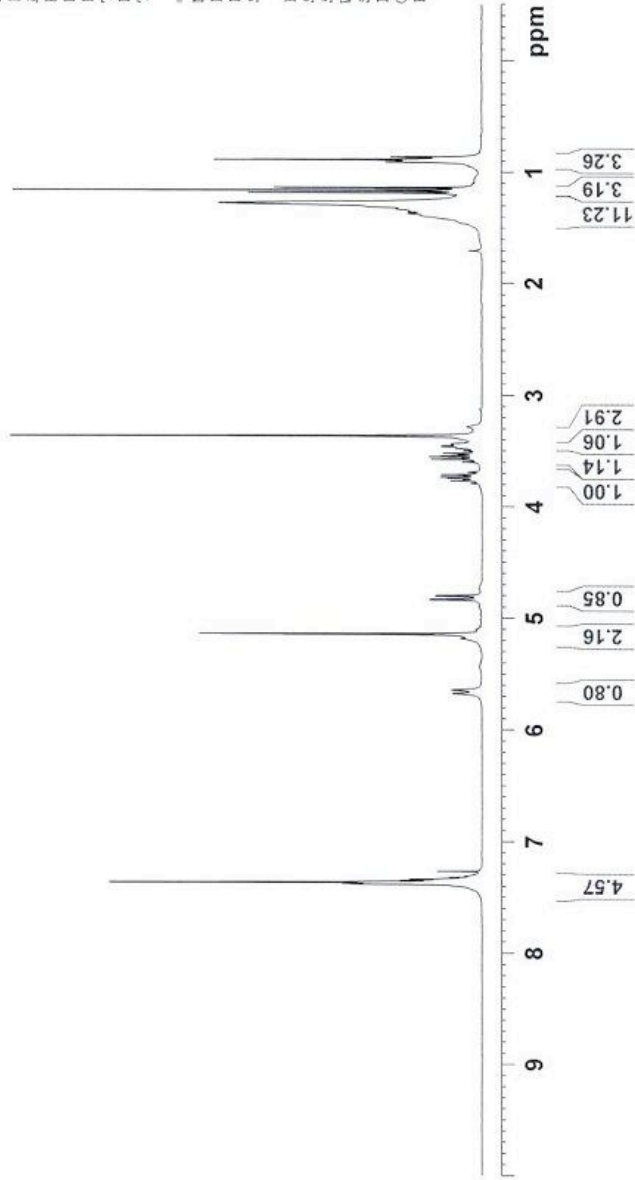

spot 1

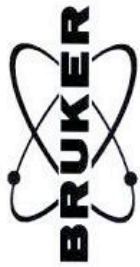

Current Data Parameters  
NAME SW05040702  
EXPNO 1  
PROCNO 1

F2 - Acquisition Parameters  
Date\_ 20070504  
Time 13.36  
INSTRUM spect  
PROBHD 5 mm QNP 1H/1  
PULPROG zgpg  
TD 65536  
SOLVENT CDC13  
NS 34  
DS 2  
SWH 17985.611 Hz  
FIDRES 0.274439 Hz  
AQ 1.8219508 sec  
RG 13004  
DW 27.800 usec  
DE 6.00 usec  
TE 300.0 K  
D1 10.00000000 sec  
d11 0.03000000 sec  
DELTA 9.89999962 sec  
TDO 1

===== CHANNEL f1 =====  
NUC1 13C  
P1 7.00 usec  
PL1 0.00 dB  
SFO1 75.4639789 MHz  
  
===== CHANNEL f2 =====  
CPDPRG2 waltz16  
NUC2 1H  
PCPD2 100.00 usec  
PL2 0.00 dB  
PL12 18.24 dB  
PL13 18.24 dB  
SFO2 300.0862003 MHz  
  
F2 - Processing parameters  
SI 32768  
SF 75.4564183 MHz  
WDW EM  
SSB 0  
LB 1.00 Hz  
GB 0  
EC 1.40

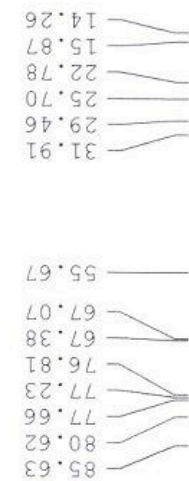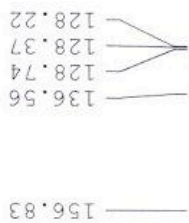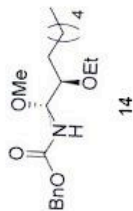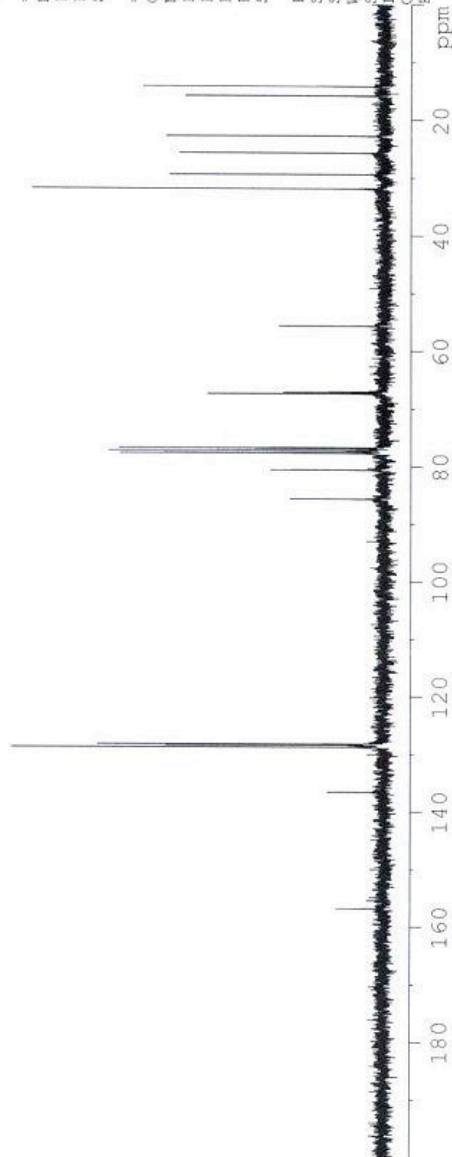



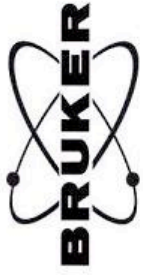

spot 2

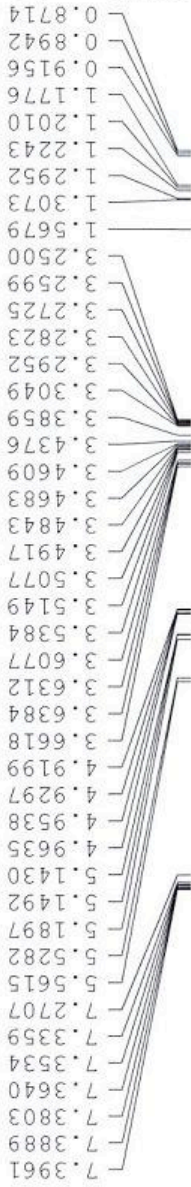

Current Data Parameters  
 NAME SW05070705  
 EXPNO 1  
 PROCNO 1

F2 - Acquisition Parameters  
 Date\_ 20070507  
 Time\_ 16.25  
 INSTRUM spect  
 PROBHD 5 mm Dual 13C/  
 PULPROG zg  
 TD 32768  
 SOLVENT CDCl3  
 NS 16  
 DS 2  
 SWH 6172.839 Hz  
 FIDRES 0.188380 Hz  
 AQ 2.6542580 sec  
 RG 574.7  
 DW 81.000 usec  
 DE 6.00 usec  
 TE 300.0 K  
 D1 2.00000000 sec  
 TDO 1

===== CHANNEL f1 =====  
 NUC1 1H  
 P1 5.00 usec  
 PL1 0.00 dB  
 SFO1 300.1318530 MHz

F2 - Processing parameters  
 SI 16384  
 SF 300.1300032 MHz  
 WDW EM  
 SSB 0  
 LB 0  
 GB 0  
 PC 1.00

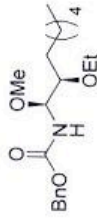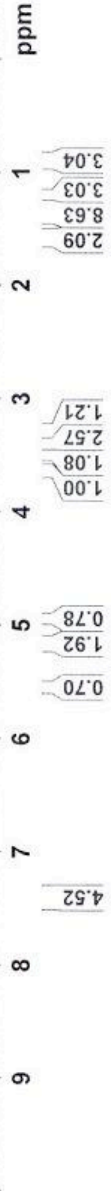

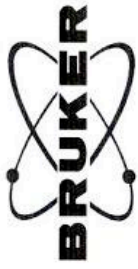

Current Data Parameters  
 NAME SW05080707  
 EXPNO 1  
 PROCNO 1

F2 - Acquisition Parameters  
 Date\_ 20070508  
 Time 20.28  
 INSTRUM spect  
 PROBHD 5 mm DUL 1H-13  
 PULPROG zgpg30  
 TD 65536  
 SOLVENT CDCl3  
 NS 402  
 DS 4  
 SWH 18115.941 Hz  
 FIDRES 0.276427 Hz  
 AQ 1.8088436 sec  
 RG 5160.6  
 DW 27.600 usec  
 DE 6.00 usec  
 TE 300.0 K  
 D1 10.00000000 sec  
 d11 0.03000000 sec  
 DELTA 9.89999962 sec  
 TDO 1

===== CHANNEL f1 =====  
 NUC1 13C  
 P1 9.00 usec  
 PL1 1.80 dB  
 SFO1 75.5381641 MHz

===== CHANNEL f2 =====  
 CPDPRG2 waltz16  
 NUC2 1H  
 FCPD2 92.00 usec  
 PL2 0.00 dB  
 PL12 20.00 dB  
 PL13 20.00 dB  
 SFO2 300.3812015 MHz

F2 - Processing parameters  
 SI 65536  
 SF 75.5305943 MHz  
 WDW EM  
 SSB 0  
 GB 0  
 PC 1.40

lower from CbzCl

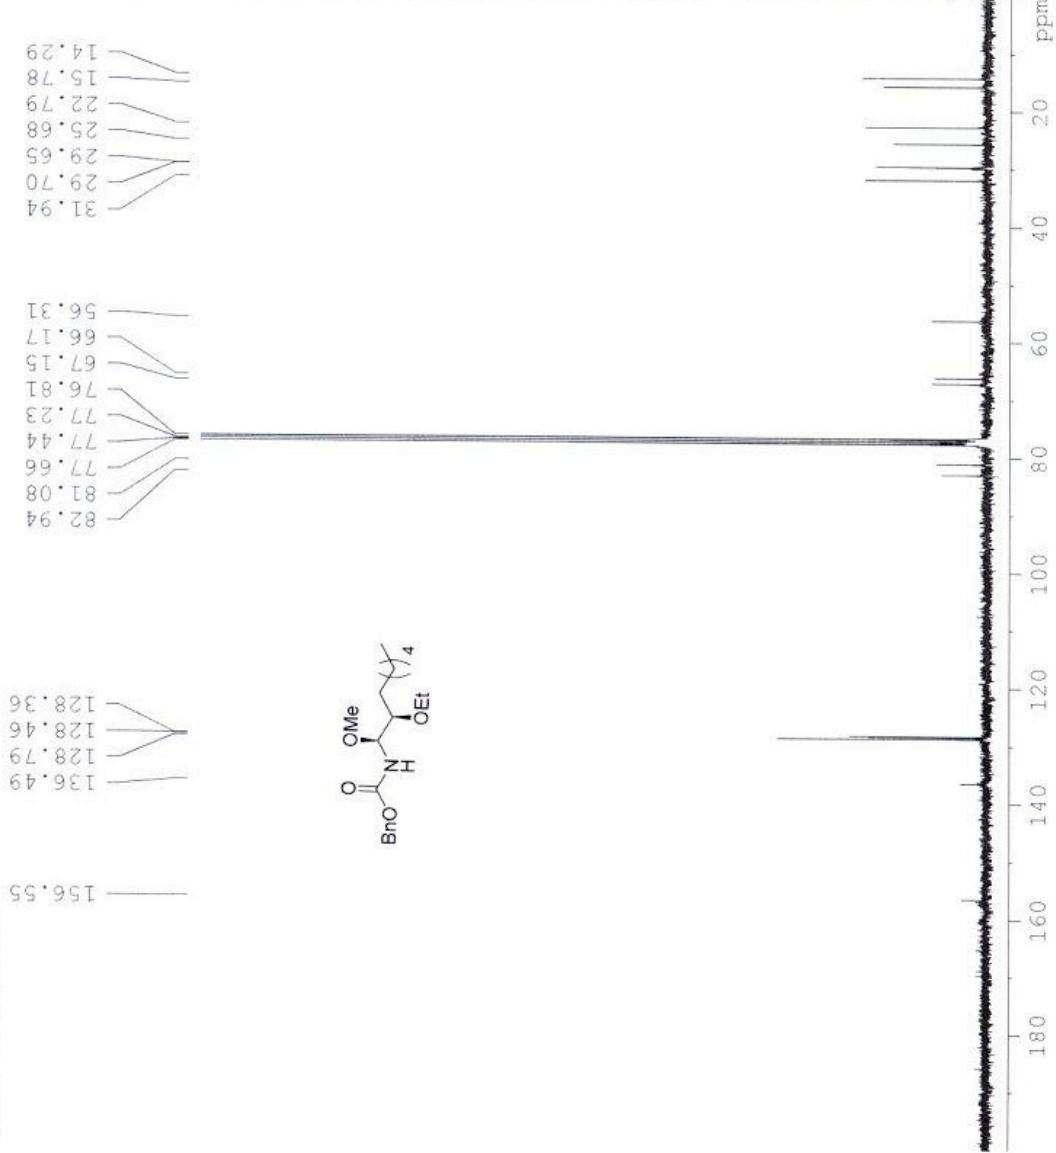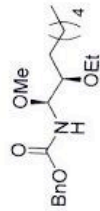

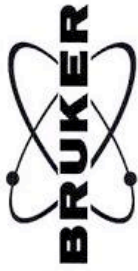

sulfonamide

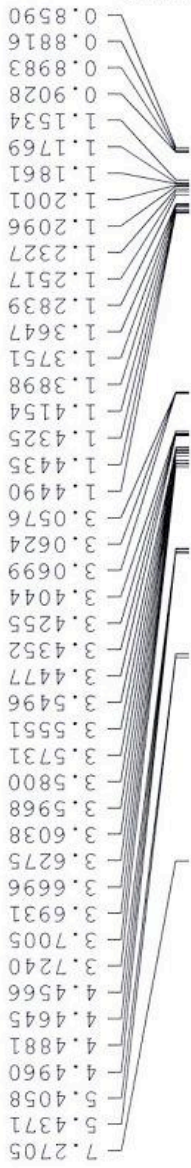

Current Data Parameters  
 NAME SW07060701  
 EXPNO 1  
 PROCNO 1

F2 - Acquisition Parameters  
 Date\_ 20070706  
 Time\_ 16.41  
 INSTRUM spect  
 PROBHD 5 mm Dual 13C/  
 PULPROG zg  
 TD 32768  
 SOLVENT CDCl3  
 NS 4  
 DS 2  
 SWH 6172.839 Hz  
 FIDRES 0.188380 Hz  
 AQ 2.6542580 sec  
 RG 57  
 DW 81.000 usec  
 DE 6.00 usec  
 TE 300.0 K  
 D1 2.00000000 sec  
 TDO 1

==== CHANNEL f1 =====  
 NUC1 1H  
 P1 5.00 usec  
 PL1 0.00 dB  
 SFO1 300.1318530 MHz

F2 - Processing parameters  
 SI 16384  
 SF 300.1300032 MHz  
 MDW EM  
 SSB 0  
 LB 0.10 Hz  
 GB 0  
 PC 1.00

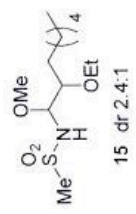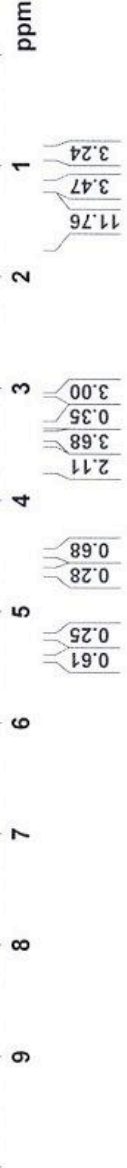

sulfonamide

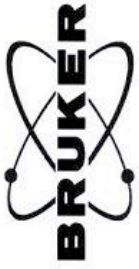

88.14  
86.04  
81.15  
79.46  
77.66  
77.23  
76.81  
67.25  
66.41  
56.47  
55.66  
43.34  
43.20  
31.91  
31.65  
29.59  
29.47  
29.34  
25.78  
25.43  
22.76  
15.82

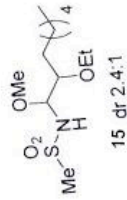

F2 - Acquisition Parameters

Date\_ 20070706  
Time 17.06  
INSTRUM spect  
PROBHD 5 mm QNP 1H/1  
PULPROG zgpg  
TD 65536  
SOLVENT CDCl3  
NS 88  
DS 2  
SWH 17985.611 Hz  
FIDRES 0.274439 Hz  
AQ 1.8219508 sec  
RG 5792.6  
DW 27.800 usec  
DE 6.00 usec  
TE 300.0 K  
D1 10.00000000 sec  
d11 0.03000000 sec  
DELTA 9.89999962 sec  
TDO 1

==== CHANNEL f1 =====  
NUC1 13C  
P1 7.00 usec  
PL1 0.00 dB  
SFO1 75.463789 MHz

==== CHANNEL f2 =====  
CPDPRG2 waltz16  
NUC2 1H  
PCPD2 100.00 usec  
PL2 0.00 dB  
PL12 18.24 dB  
PL13 18.24 dB  
SFO2 300.0862003 MHz

F2 - Processing parameters  
SI 32768  
SF 75.4564179 MHz  
WDW EM  
SSB 0  
LB 1.00 Hz  
GB 0  
PC 1.40

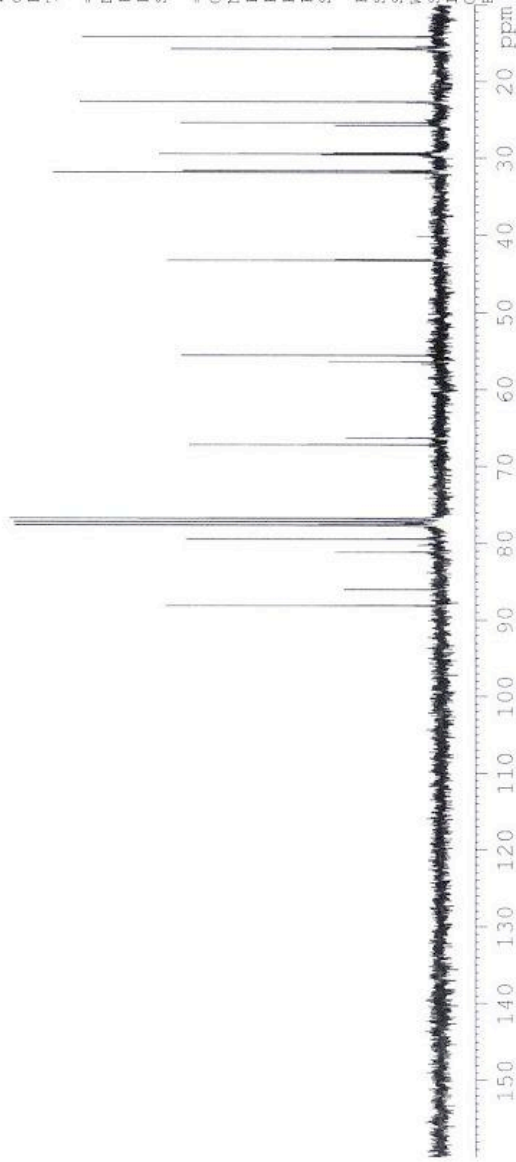

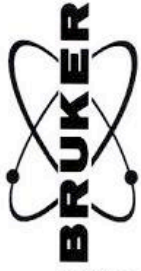

higher t-Bu aminal

7.2706  
6.1182  
6.0875  
5.3393  
5.3325  
5.3080  
5.3011  
5.8646  
5.8661  
5.8410  
5.8328  
5.8093  
5.6137  
5.6053  
5.5904  
5.5819  
5.5669  
5.5583  
5.2951  
5.2826  
5.2774  
5.2625  
5.3493  
5.3265  
5.3036  
5.7593  
5.4229  
5.3844  
5.3174  
5.2825  
5.2674  
5.2165  
5.1882  
5.1772  
5.1649  
5.1532  
5.1462  
5.1302  
5.1232  
5.9390  
5.8942  
5.8865  
5.8728  
5.8503

Current Data Parameters  
NAME SW04250702  
EXPNO 1  
PROCNO 1

F2 - Acquisition Parameters  
Date\_ 20070425  
Time 11.47  
INSTRUM spect  
PROBHD 5 mm QNP 1H/1  
PULPROG zg  
TD 32768  
SOLVENT CDCl3  
NS 4  
DS 2  
SWH 6172.839 Hz  
FIDRES 0.188380 Hz  
AQ 2.6542580 sec  
RG 50.8  
DM 81.000 usec  
DE 6.00 usec  
TE 300.0 K  
D1 1.00000000 sec  
TD0 1

===== CHANNEL f1 =====  
NUC1 1H  
P1 7.00 usec  
PL1 0.00 dB  
SFO1 300.0869531 MHz

F2 - Processing parameters  
SI 16384  
SF 300.0850014 MHz  
WDW EM  
SSB 0  
LB 0.30 Hz  
GB 0  
PC 1.00

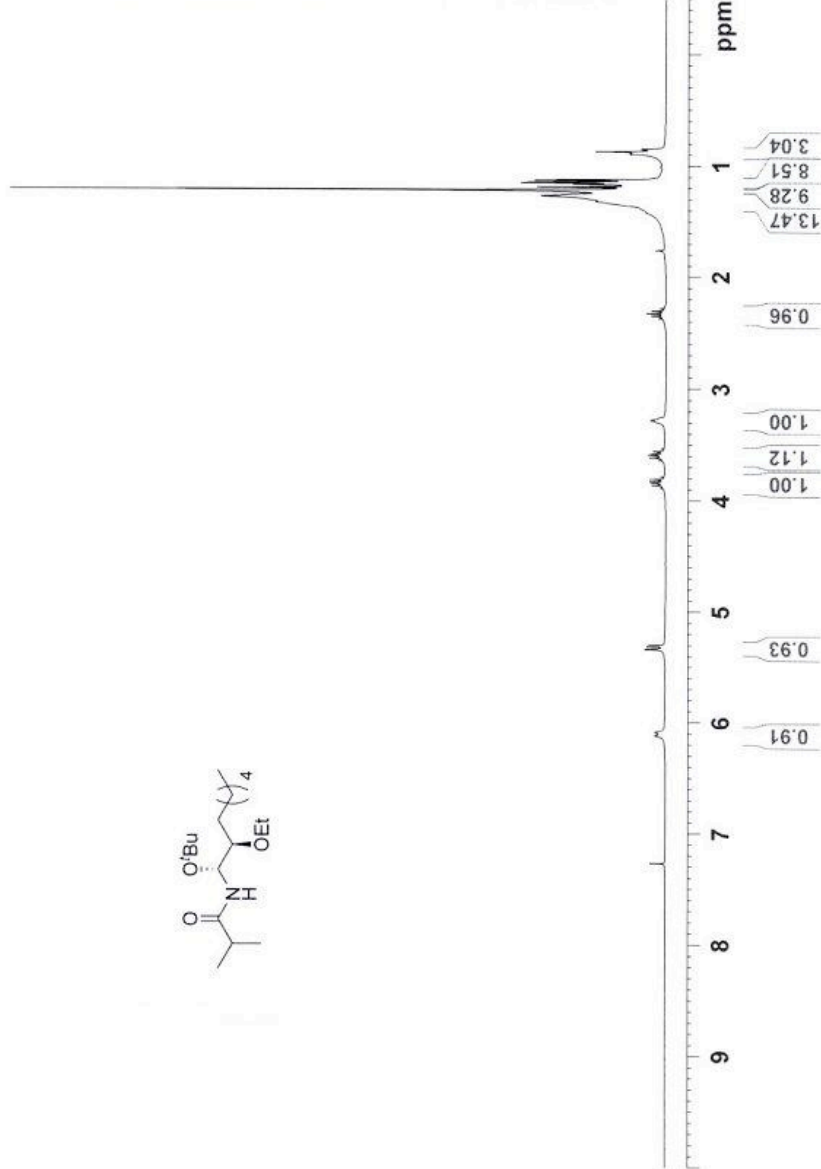

higher t-bu aminal

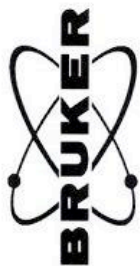

175.80  
83.01  
77.23  
77.66  
76.81  
75.52  
74.65  
67.59

36.07  
31.98  
31.59  
29.53  
28.65  
25.87  
22.80  
19.67  
19.41  
15.93  
14.26

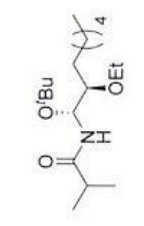

Current Data Parameters  
NAME SW04250701  
EXPNO 1  
PROCNO 1

F2 - Acquisition Parameters  
Date\_ 20070423  
Time 11.37  
INSTRUM spect  
PROBHD 5 mm QNP 1H/1  
PULPROG zgpg  
TD 65536  
SOLVENT CDCl3  
NS 56  
DS 2  
SWH 17985.611 Hz  
FIDRES 0.274439 Hz  
AQ 1.8219508 sec  
RG 13004  
DW 27.800 usec  
DE 6.00 usec  
TE 300.0 K  
D1 10.0000000 sec  
d11 0.0300000 sec  
DELTA 9.8999962 sec  
TD0 1

==== CHANNEL f1 =====  
NUC1 13C  
P1 7.00 usec  
PL1 0.00 dB  
SF01 75.4639789 MHz

==== CHANNEL f2 =====  
CPDPRG2 waltz16  
NUC2 1H  
PCPD2 100.00 usec  
PL2 0.00 dB  
PL12 18.24 dB  
PL13 18.24 dB  
SF02 300.0862003 MHz

F2 - Processing parameters  
SI 32768  
SF 75.4564164 MHz  
WDW EM  
SSB 0  
LB 1.00 Hz  
GB 0  
PC 1.40

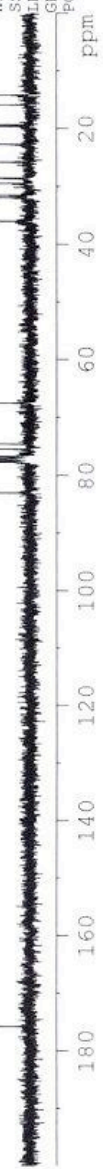



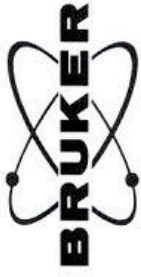

lower t-Bu aminal

1.1658  
1.1893  
1.2020  
1.2679  
1.3754  
1.3911  
1.4105  
1.4539  
1.4739  
1.4923  
1.5092  
2.2802  
2.3032  
2.3262  
3.1059  
3.1199  
3.1306  
3.5473  
3.5614  
3.5706  
3.5841  
3.5938  
3.6074  
3.6165  
3.6308  
3.660  
5.3794  
5.3972  
5.4106  
5.9899  
6.0207  
7.2701

F2 - Acquisition Parameters

Date 20070425  
Time 13.20  
INSTRUM spect  
PROBHD 5 mm DUL IH-13  
PULPROG zg  
TD 65536  
SOLVENT CDCl3  
NS 3  
DS 2  
SWH 6218.905 Hz  
FIDRES 0.094893 Hz  
AQ 5.2691445 sec  
RG 35.9  
DW 80.400 usec  
DE 6.00 usec  
TE 300.0 K  
D1 2.00000000 sec  
TD0 1

==== CHANNEL f1 =====

NUC1 1H  
P1 9.00 usec  
PL1 1.00 dB  
SF01 300.3818550 MHz

F2 - Processing parameters

SI 32768  
SF 300.3799992 MHz  
WDW EM  
SSB 0  
LB 0.30 Hz  
GB 0  
PC 1.00

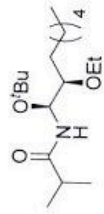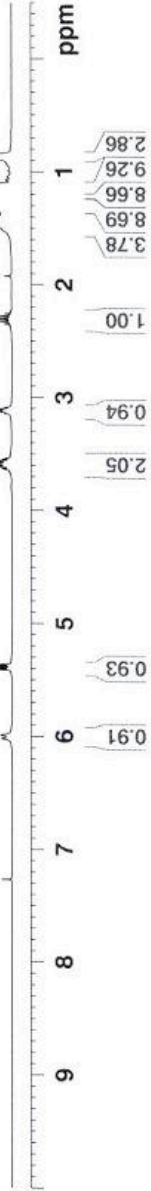

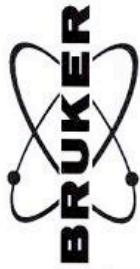

lower t-Bu aminal

175.34

82.08  
77.66  
77.23  
76.81  
74.88  
74.32  
66.79

36.06  
31.99  
30.19  
29.63  
28.54  
25.95  
22.79  
19.49  
19.36  
15.79  
14.26

Current Data Parameters  
 NAME SW04250703  
 EXPNO 1  
 PROCNO 1

F2 - Acquisition Parameters  
 Date\_ 20070425  
 Time 13.14  
 INSTRUM spect  
 PROBHD 5 mm DUL 1H-13  
 PULPROG zgpg  
 TD 65536  
 SOLVENT CDCl3  
 NS 15  
 DS 4  
 SWH 18115.941 Hz  
 FIDRES 0.276427 Hz  
 AQ 1.8088436 sec  
 RG 13004  
 DW 27.600 usec  
 DE 6.00 usec  
 TE 300.0 K  
 D1 10.0000000 sec  
 d11 0.0300000 sec  
 DELTA 9.8999962 sec  
 TDO 1

==== CHANNEL f1 =====  
 NUC1 13C  
 P1 9.00 usec  
 PL1 1.80 dB  
 SFO1 75.5381641 MHz

==== CHANNEL f2 =====  
 CPDPRG2 waltz16  
 NUC2 1H  
 PCPD2 92.00 usec  
 PL2 0.00 dB  
 PL12 20.00 dB  
 PL13 20.00 dB  
 SFO2 300.3812015 MHz

F2 - Processing parameters  
 SI 65536  
 SF 75.5305962 MHz  
 WDW EM  
 SSB 0  
 LB 0  
 GB 0  
 PC 1.40

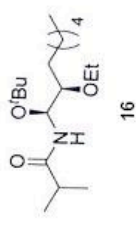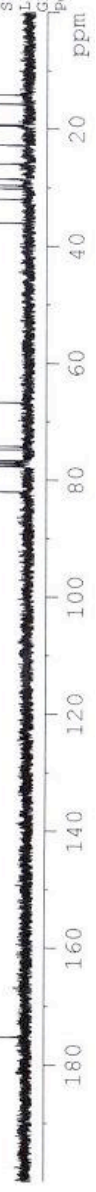



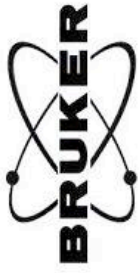

spot 1 04-26-07

7.2949  
7.2705  
7.2678  
7.2664  
7.2417  
7.0484  
7.0449  
7.0379  
7.0217  
7.0188  
7.0164  
6.9863  
6.9621  
5.9426  
5.9379  
5.9095  
5.9049  
3.9910  
3.9676  
3.9594  
3.9359  
3.7415  
3.7182  
3.7098  
3.6864  
3.6627  
2.3906  
2.3677  
2.3449  
1.4259  
1.4065  
1.3544  
1.3296  
1.2846  
1.2614  
1.2379  
1.1615  
1.1386  
1.0969  
1.0738  
0.9045  
0.8982  
0.8829  
0.8601

Current Data Parameters  
NAME SW04260703  
EXPNO 1  
PROCNO 1

F2 - Acquisition Parameters  
Date\_ 20070426  
Time 14.30  
INSTRUM spect  
PROBHD 5 mm Dual 13C/  
PULPROG zg  
TD 32768  
SOLVENT CDCl3  
NS 4  
DS 2  
SWH 6172.839 Hz  
FIDRES 0.188380 Hz  
AQ 2.6542580 sec  
RG 35.9  
DW 81.000 usec  
DE 6.00 usec  
TE 300.0 K  
D1 2.00000000 sec  
TD0 1

==== CHANNEL f1 =====  
NUC1 1H  
P1 5.00 usec  
PL1 0.00 dB  
SFO1 300.1318530 MHz

F2 - Processing parameters  
SI 16384  
SF 300.1300039 MHz  
WDW EM  
SSB 0  
LB 0.10 Hz  
GB 0  
PC 1.00

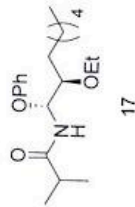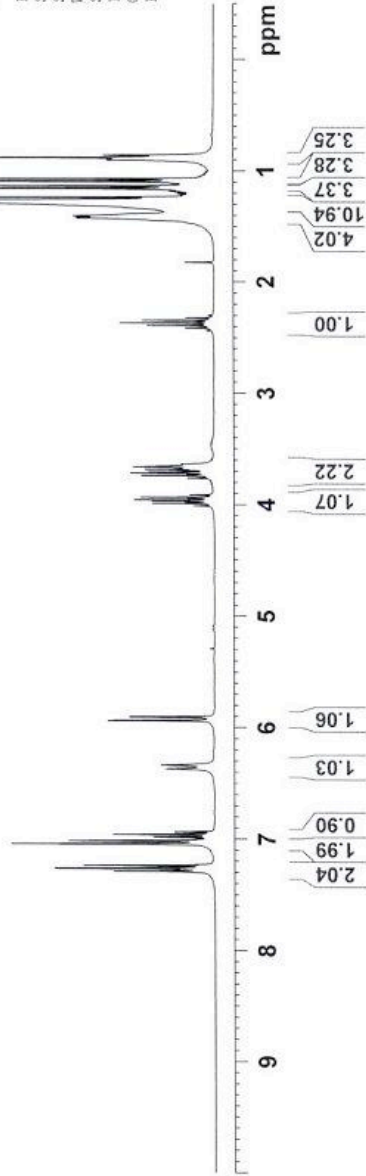

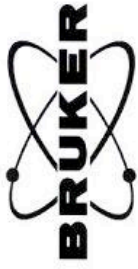

higher PhOH amination

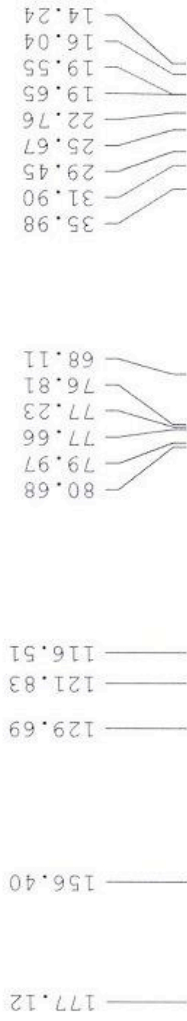

Current Data Parameters  
 NAME SW04280701  
 EXPNO 1  
 PROCNO 1

F2 - Acquisition Parameters  
 Date\_ 20070428  
 Time 12.50  
 INSTRUM spect  
 PROBHD 5 mm QNP 1H/1  
 PULPROG zgpg  
 TD 65536  
 SOLVENT CDC13  
 NS 57  
 DS 2  
 SWH 17985.611 Hz  
 FIDRES 0.274439 Hz  
 AQ 1.8219508 sec  
 RG 13004  
 DW 27.800 usec  
 DE 6.00 usec  
 TE 300.0 K  
 D1 10.00000000 sec  
 d11 0.03000000 sec  
 DELTA 9.89999962 sec  
 TDO 1

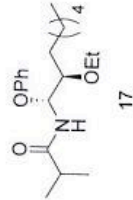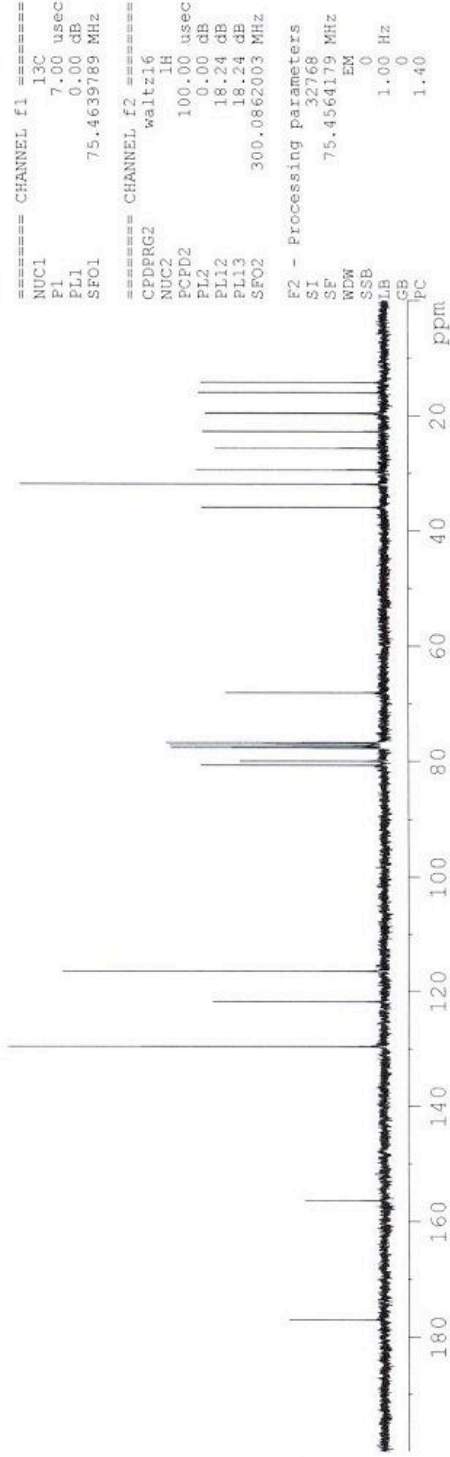

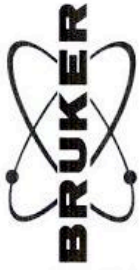

PhOH addition

0.8473  
0.8555  
0.8701  
0.8784  
0.8924  
1.0854  
1.1083  
1.1376  
1.1606  
1.1707  
1.1859  
1.1938  
1.2004  
1.2091  
1.2226  
1.2335  
1.2459  
1.2692  
1.2953  
1.6563  
1.6787  
1.6904  
2.3320  
2.3550  
2.3780  
3.4402  
3.6308  
3.6541  
3.6973  
3.7207  
6.0135  
6.0351  
6.0463  
6.9701  
6.9944  
7.0397  
7.0424  
7.0459  
7.0684  
7.0718  
7.2447  
7.2513  
7.2703  
7.2981

Current Data Parameters  
NAME SW05080705  
EXPNO 1  
PROCNO 1

F2 - Acquisition Parameters  
Date\_ 20070508  
Time 20.07  
INSTRUM spect  
PROBHD 5 mm DUL 1H-13  
PULPROG zg  
TD 65536  
SOLVENT CDCl3  
NS 5  
DS 2  
SWH 6218.905 Hz  
FIDRES 0.094893 Hz  
AQ 5.2691445 sec  
RG 114  
DM 80.400 usec  
DE 6.00 usec  
TE 300.0 K  
D1 2.00000000 sec  
TDO 1

==== CHANNEL f1 =====  
NUC1 1H  
P1 9.00 usec  
PL1 1.00 dB  
SF01 300.3818550 MHz

F2 - Processing parameters  
SI 32768  
SF 300.3799994 MHz  
WDW EM  
SSB 0  
LB 0.30 Hz  
GB 0  
PC 1.00

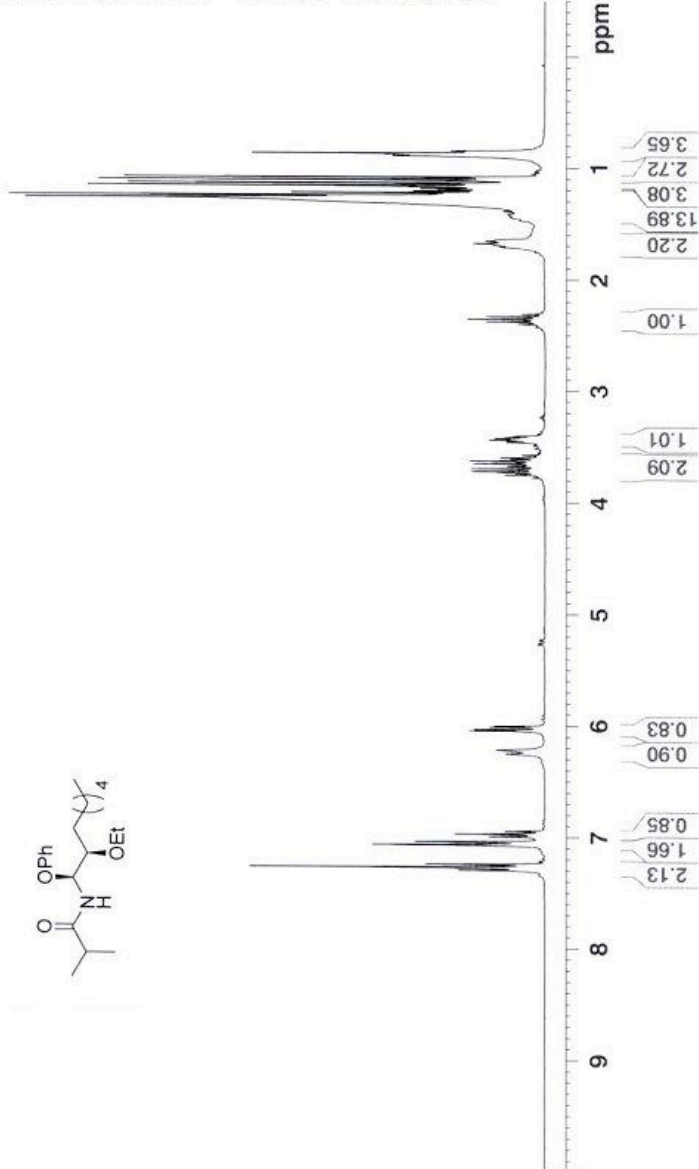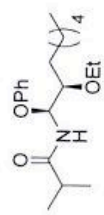

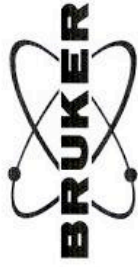

PhOH addition

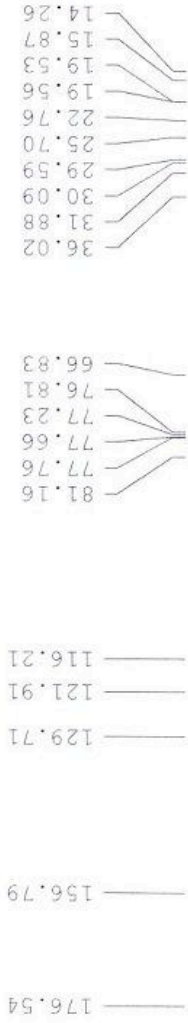

Current Data Parameters  
NAME SW05080706  
EXPNO 1  
PROCNO 1

F2 - Acquisition Parameters  
Date\_ 20070508  
Time 20.14  
INSTRUM spect  
PROBHD 5 mm DUL 1H-13  
PULPROG zgpg  
TD 65536  
SOLVENT CDCl3  
NS 55  
DS 4  
SWH 18115.941 Hz  
FIDRES 0.276427 Hz  
AQ 1.8088436 sec  
RG 5160.6  
DW 27.600 usec  
DE 6.00 usec  
TE 300.0 K  
D1 10.00000000 sec  
d11 0.03000000 sec  
DELTA 9.89999962 sec  
TD0 1

==== CHANNEL f1 =====  
NUC1 13C  
P1 9.00 usec  
PL1 1.80 dB  
SFO1 75.5381641 MHz

==== CHANNEL f2 =====  
CFPRG2 waltz16  
NUC2 1H  
PCPD2 92.00 usec  
PL2 0.00 dB  
PL12 20.00 dB  
PL13 20.00 dB  
SFO2 300.3812015 MHz

F2 - Processing parameters  
SI 65536  
SF 75.5305949 MHz  
WDW EM  
SSB 0  
LB 1.00 Hz  
GB 0  
PC 1.40

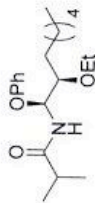

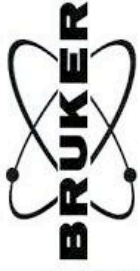

higher spot 05-01-07

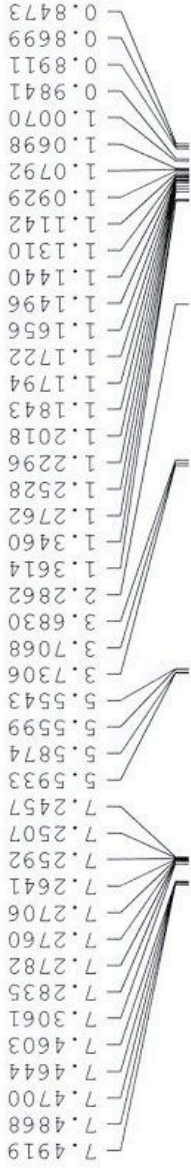

Current Data Parameters  
 NAME SW05010704  
 EXPNO 1  
 PROCNO 1

F2 - Acquisition Parameters  
 Date 20070501  
 Time 17.29  
 INSTRUM spect  
 PROBHD 5 mm Dual 13C/  
 PULPROG zg  
 TD 32768  
 SOLVENT CDCl3  
 NS 6  
 DS 2  
 SMH 6172.839 Hz  
 FIDRES 0.188380 Hz  
 AQ 2.6542580 sec  
 RG 90.5  
 DW 81.000 usec  
 DE 6.00 usec  
 TE 300.0 K  
 DL 2.00000000 sec  
 TDO 1

==== CHANNEL f1 =====  
 NUC1 1H  
 P1 5.00 usec  
 PL1 0.00 dB  
 SFO1 300.1318530 MHz

F2 - Processing parameters  
 SI 16384  
 SF 300.1300032 MHz  
 WDW EM  
 SSB 0  
 LB 0.10 Hz  
 GB 0  
 PC 1.00

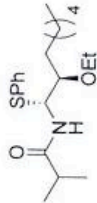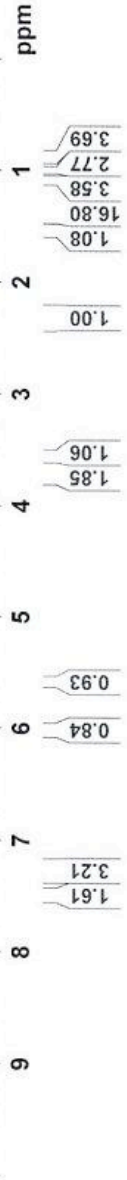

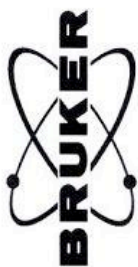

higher spot

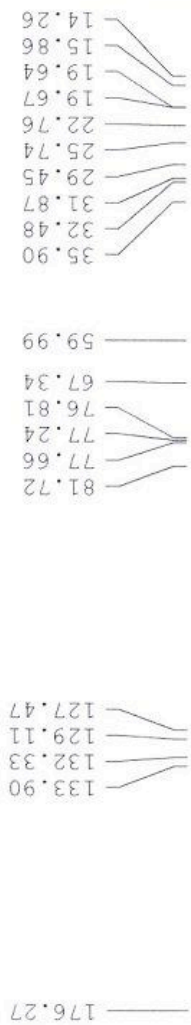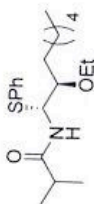

Current Data Parameters  
 NAME SW05020703  
 EXPNO 1  
 PROCNO 1

F2 - Acquisition Parameters  
 Date\_ 20070502  
 Time\_ 20.06  
 INSTRUM spect  
 PROBHD 5 mm QNP 1H/1  
 PULPROG zgpg  
 TD 65536  
 SOLVENT CDCl3  
 NS 275  
 DS 2  
 SWH 17985.611 Hz  
 FIDRES 0.274439 Hz  
 AQ 1.8219508 sec  
 RG 13004  
 DW 27.800 usec  
 DE 6.00 usec  
 TE 300.0 K  
 D1 10.0000000 sec  
 d11 0.0300000 sec  
 DELTA 9.8999962 sec  
 TDO 1

==== CHANNEL f1 =====  
 NUC1 13C  
 P1 7.00 usec  
 PL1 0.00 dB  
 SFO1 75.4639783 MHz

==== CHANNEL f2 =====  
 CPDPRG2 waitz16  
 NUC2 1H  
 PCPD2 100.00 usec  
 PL2 0.00 dB  
 PL12 18.24 dB  
 PL13 18.24 dB  
 SFO2 300.0862003 MHz

F2 - Processing parameters  
 SI 32768  
 SF 75.4564167 MHz  
 NDW EM  
 SSB 0  
 LB 1.00 Hz  
 GB 0  
 PC 1.40



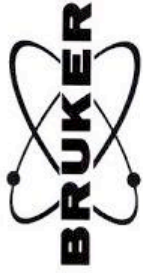

Current Data Parameters  
 NAME SW05010703  
 EXPNO 1  
 PROCNO 1

F2 - Acquisition Parameters  
 Date\_ 20070501  
 Time 16.37  
 INSTRUM spect  
 PROBHD 5 mm QNP 1H/1  
 PULPROG zg  
 TD 32768  
 SOLVENT CDCl3  
 NS 4  
 DS 2  
 SWH 6172.839 Hz  
 FIDRES 0.188380 Hz  
 AQ 2.6542580 sec  
 RG 35.9  
 DW 81.000 usec  
 DE 6.00 usec  
 TE 300.0 K  
 D1 1.00000000 sec  
 TDO 1

===== CHANNEL f1 =====  
 NUC1 1H  
 P1 7.00 usec  
 PL1 0.00 dB  
 SFO1 300.0868531 MHz

F2 - Processing parameters  
 SI 16384  
 SF 300.0650003 MHz  
 WDW EM  
 SSB 0  
 LB 0.30 Hz  
 GB 0  
 PC 1.00

lower spot

7.4702  
7.4657  
7.4427  
7.2984  
7.2928  
7.2707  
7.2451  
7.2355  
7.2310  
7.2082  
5.9940  
5.6535  
5.6429  
5.6213  
5.6108  
3.6464  
3.6387  
3.6152  
3.5864  
3.5631  
3.5550  
3.5408  
3.5316  
3.5196  
3.5090  
2.2778  
2.2549  
2.2319  
1.7010  
1.6789  
1.4216  
1.3965  
1.3049  
1.2815  
1.2353  
1.2120  
1.1887  
1.0739  
1.0511  
0.9944  
0.9713  
0.9046  
0.8835  
0.8607

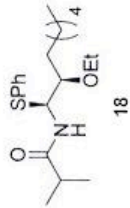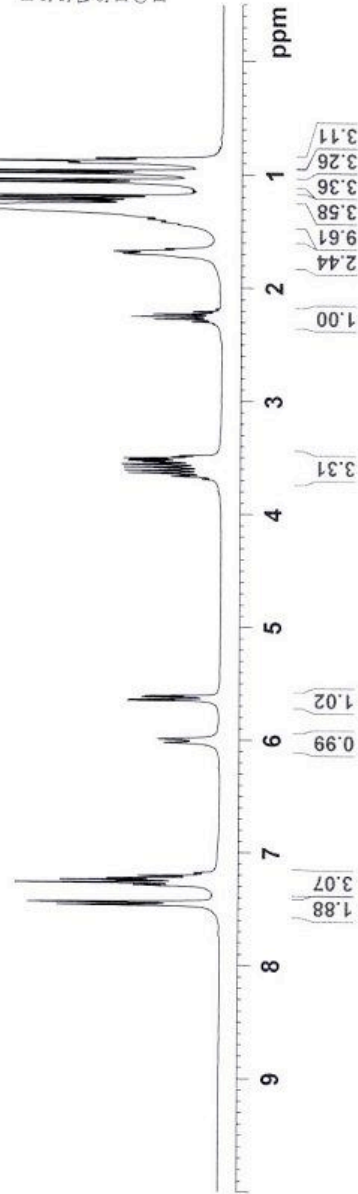

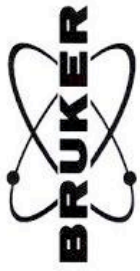

lower spot

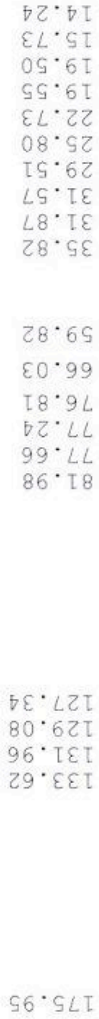

Current Data Parameters  
 NAME SW05010705  
 EXPNO 1  
 PROCNO 1

F2 - Acquisition Parameters  
 Date\_ 20070501  
 Time 16.41  
 INSTRUM spect  
 PROBHD 5 mm QNP 1H/1  
 PULPROG zgpg  
 TD 65536  
 SOLVENT CDCl3  
 NS 38  
 DS 2  
 SWH 17985.611 Hz  
 FIDRES 0.274439 Hz  
 AQ 1.8219508 sec  
 RG 13004  
 DW 27.800 usec  
 DE 6.00 usec  
 TE 300.0 K  
 D1 10.00000000 sec  
 d11 0.03000000 sec  
 DELTA 9.89999962 sec  
 TDO 1

===== CHANNEL f1 =====  
 NUC1 13C  
 P1 7.00 usec  
 PL1 0.00 dB  
 SFO1 75.4639789 MHz

===== CHANNEL f2 =====  
 CPDPRG2 waltz16  
 NUC2 1H  
 PCPD2 100.00 usec  
 PL2 0.00 dB  
 PL12 18.24 dB  
 PL13 18.24 dB  
 SFO2 300.0862003 MHz

F2 - Processing parameters  
 SI 32768  
 SF 75.4564194 MHz  
 WDW EM  
 SSB 0  
 LB 1.00 Hz  
 GB 0  
 PC 1.40

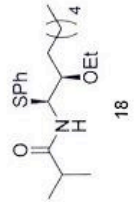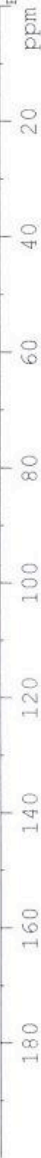







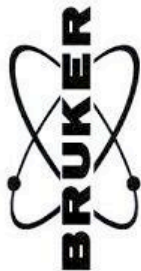

lower spot benzoate amide

8.0872  
8.0726  
7.5930  
7.5781  
7.4842  
7.4686  
7.4532  
7.2705  
5.9997  
5.3447  
5.3368  
5.3252  
5.3173  
5.1317  
5.1235  
3.3819  
2.4122  
2.3984  
2.3846  
1.7957  
1.7849  
1.7771  
1.7666  
1.3862  
1.3801  
1.3687  
1.3614  
1.3554  
1.3444  
1.3296  
1.3173  
1.3042  
1.2897  
1.2861  
1.2711  
1.2652  
1.1932  
1.1882  
1.1790  
1.1649  
0.8805  
0.8671  
0.8531

Current Data Parameters  
NAME SW02170701  
EXPNO 1  
PROCNO 1

F2 - Acquisition Parameters  
Date\_ 20070217  
Time 15.44  
INSTRUM spect  
PROBHD 5 mm Multinucl  
PULPROG zgpg30  
TD 65536  
SOLVENT CDCl3  
NS 9  
DS 2  
SWH 10330.578 Hz  
FIDRES 0.157632 Hz  
AQ 3.1719923 sec  
RG 64  
DW 48.400 usec  
DE 6.00 usec  
TE 298.2 K  
D1 2.0000000 sec  
TDO 1

==== CHANNEL f1 =====  
NUC1 1H  
P1 9.00 usec  
PL1 0.00 dB  
SFO1 500.1330885 MHz

F2 - Processing parameters  
SI 32768  
SF 500.1300082 MHz  
WDW EM  
SSB 0  
LB 0.10 Hz  
GB 0  
PC 1.00

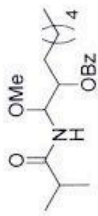

ppm

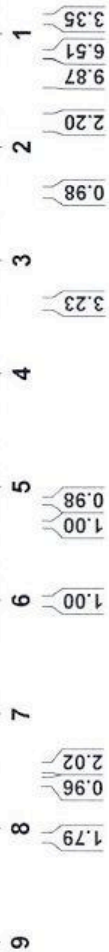

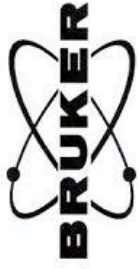

Current Data Parameters  
 NAME SW02170703  
 EXPNO 1  
 PROCNO 1

F2 - Acquisition Parameters  
 Date\_ 20070217  
 Time 15.50  
 INSTRUM spect  
 PROBHD 5 mm Multinucl  
 PULPROG zgpg  
 TD 65536  
 SOLVENT CDCl3  
 NS 2523  
 DS 2  
 SWH 30030.029 Hz  
 FIDRES 0.458222 Hz  
 AQ 1.0912244 sec  
 RG 2580.3  
 DW 16.650 usec  
 DE 6.00 usec  
 TE 298.2 K  
 D1 6.00000000 sec  
 d11 0.03000000 sec  
 DELTA 5.90000010 sec  
 TDO 1

===== CHANNEL f1 =====  
 NUC1 13C  
 P1 11.00 usec  
 PL1 -2.00 dB  
 SFO1 125.7703643 MHz

===== CHANNEL f2 =====  
 CPDPRG2 waitz16  
 NUC2 1H  
 PCPD2 100.00 usec  
 PL2 20.00 dB  
 PL12 20.00 dB  
 PL13 20.00 dB  
 SFO2 500.1320005 MHz

F2 - Processing parameters  
 SI 32768  
 SF 125.7577628 MHz  
 WDW EM  
 SSB 0  
 GB 0  
 PC 1.40

lower spot benzoate amide

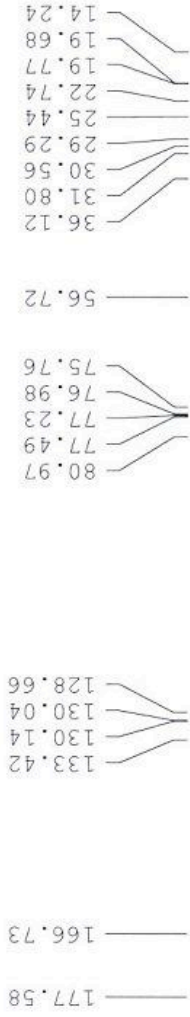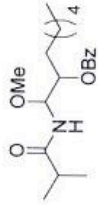

20 slow eluting product

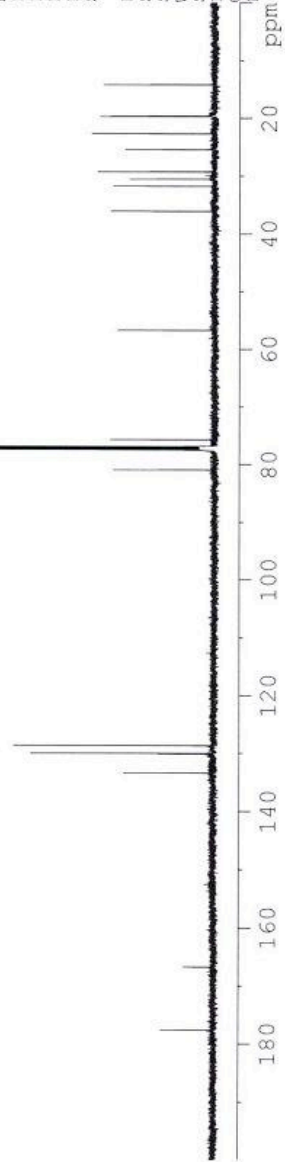

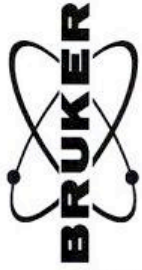

hemiaminal benzoate

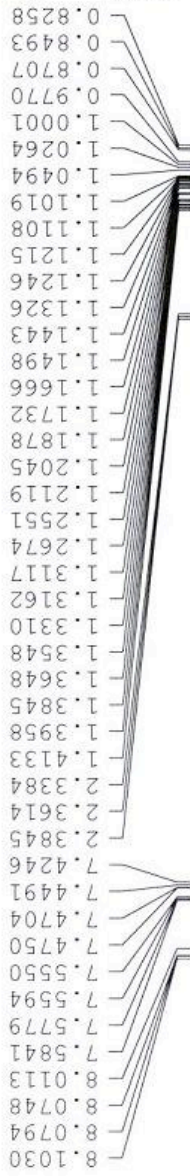

Current Data Parameters  
 Name SW02220701  
 EXNO 1  
 PROCNO 1

F2 - Acquisition Parameters  
 Date\_ 20070222  
 Time\_ 17:04  
 INSTRUM spect  
 PROBHD 5 mm DUL 1H-13  
 PULPROG zg  
 TD 65536  
 SOLVENT CDCl3  
 NS 2  
 DS 2  
 SWH 6216.905 Hz  
 FIDRES 0.094893 Hz  
 AQ 5.2691445 sec  
 RG 35.9  
 DW 80.400 usec  
 DE 6.00 usec  
 TE 300.0 K  
 D1 2.0000000 sec  
 TDO 1

===== CHANNEL f1 =====  
 NUC1 1H  
 P1 9.00 usec  
 PL1 1.00 dB  
 SF01 300.3818550 MHz

F2 - Processing Parameters  
 S1 32768  
 SF 300.3799936 MHz  
 WDW EM  
 SSB 0  
 LB 0.30 Hz  
 GB 0  
 PC 1.00

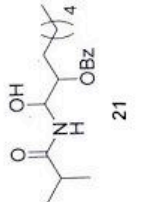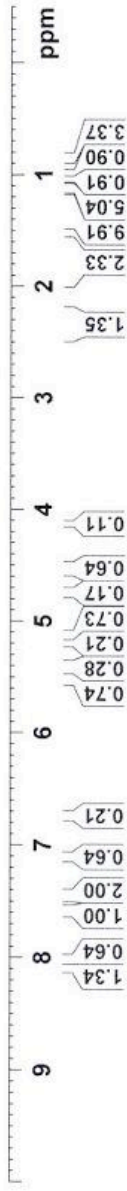



hemiaminal benzoate

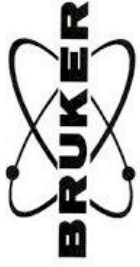

Current Data Parameters  
 NAME SW02220702  
 EXPNO 1  
 PROCNO 1

F2 - Acquisition Parameters  
 Date\_ 20070222  
 Time 17.09  
 INSTRUM spect  
 PROBHD 5 mm DUL 1H-13  
 PULPROG zgpg  
 TD 65536  
 SOLVENT CDCl3  
 NS 37  
 DS 4  
 SWH 18115.941 Hz  
 FIDRES 0.276427 Hz  
 AQ 1.9088436 sec  
 RG 10321.3  
 DW 27.600 usec  
 DE 6.00 usec  
 TE 300.0 K  
 D1 10.00000000 sec  
 d11 0.03000000 sec  
 DELTA 9.89999962 sec  
 TD0 1

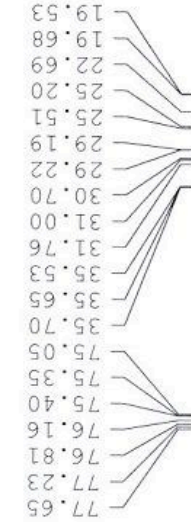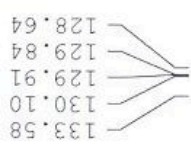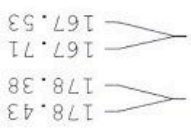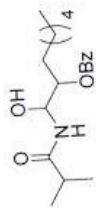

21

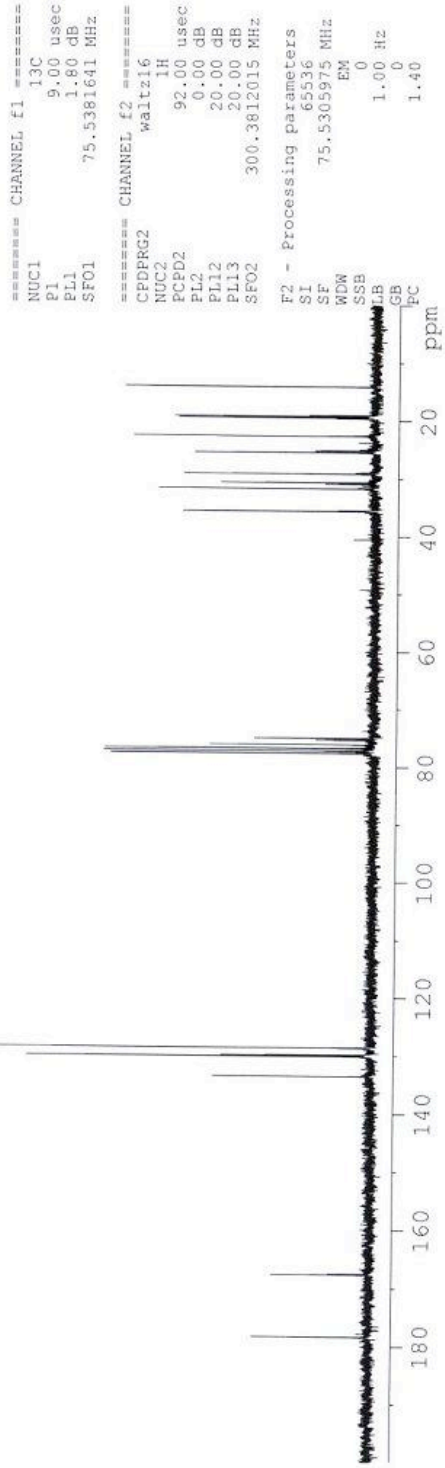

product

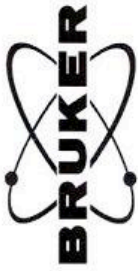

Current Data Parameters  
NAME SW03160702  
EXPNO 1  
PROCNO 1

F2 - Acquisition Parameters  
Date\_ 20070316  
Time 15.27  
INSTRUM spect  
PROBHD 5 mm QNP 1H/1  
PULPROG zg  
TD 32768  
SOLVENT CDCl3  
NS 2  
DS 2  
SWH 6172.839 Hz  
FIDRES 0.188380 Hz  
AQ 2.6542580 sec  
RG 64  
DW 81.000 usec  
DE 6.00 usec  
TE 300.0 K  
D1 1.00000000 sec  
TDO 1

===== CHANNEL f1 =====  
NUC1 1H  
P1 7.00 usec  
PL1 0.00 dB  
SFO1 300.0868531 MHz

F2 - Processing parameters  
SI 16384  
SF 300.0850014 MHz  
WDW EM  
SSB 0  
LB 0.30 Hz  
GB 0  
PC 1.00

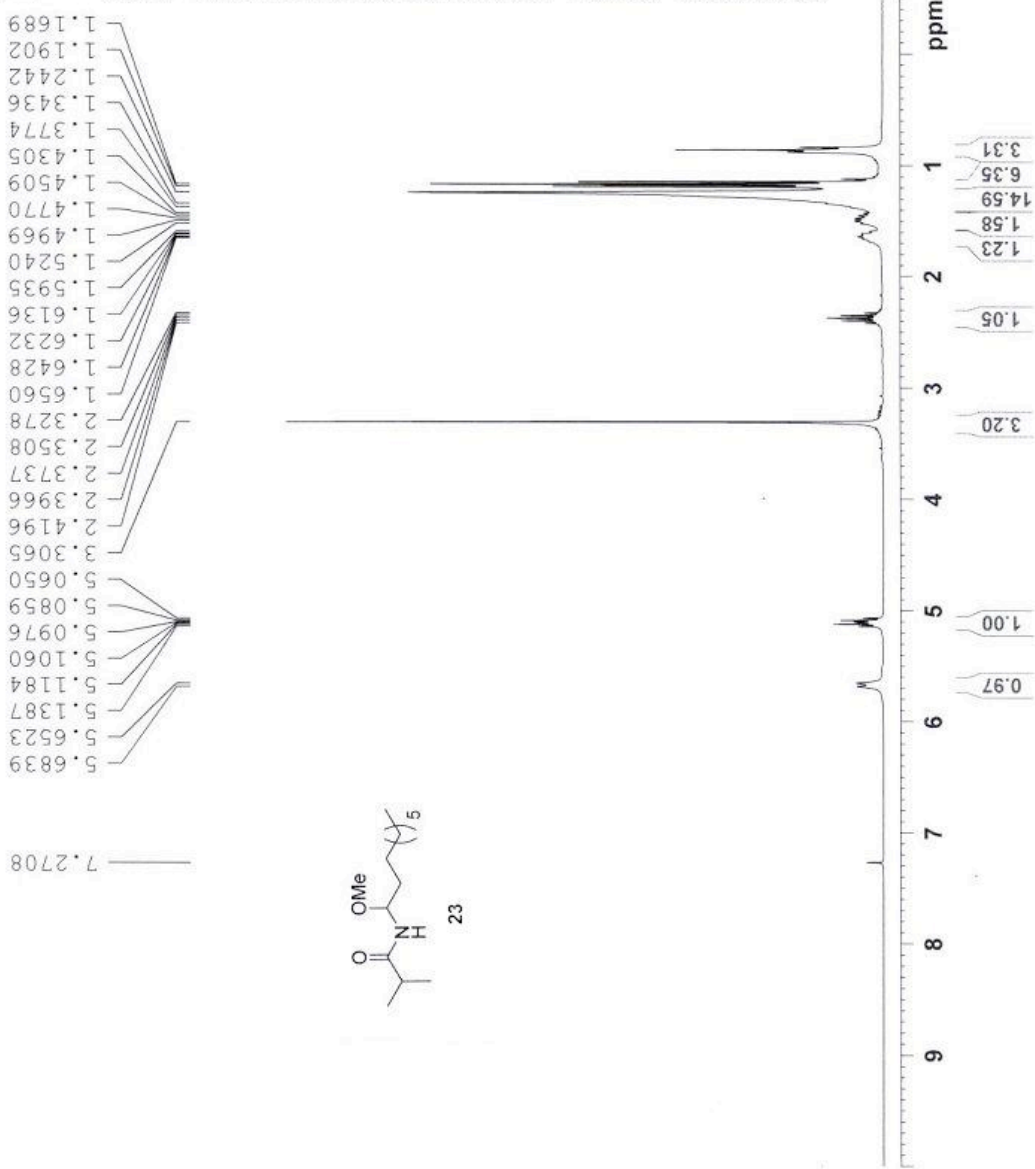



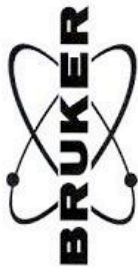

Current Data Parameters  
NAME SW03170701  
EXPNO 1  
PROCNO 1

F2 - Acquisition Parameters  
Date\_ 20070317  
Time 12.39  
INSTRUM spect  
PROBHD 5 mm Dual 13C/  
PULPROG zgpg  
TD 32768  
SOLVENT CDCl3  
NS 49  
DS 2  
SWH 17985.611 Hz  
FIDRES 0.548877 Hz  
AQ 0.9110004 sec  
RG 1448.2  
DM 27.800 usec  
DE 6.00 usec  
TE 300.0 K  
D1 6.00000000 sec  
d11 0.03000000 sec  
DELTA 5.90000010 sec  
TD0 1

===== CHANNEL f1 =====  
NUC1 13C  
P1 5.00 usec  
PL1 0.00 dB  
SFO1 75.4752953 MHz

===== CHANNEL f2 =====  
CPDPRG2 waitz16  
NUC2 1H  
PCPD2 100.00 usec  
PL2 0.00 dB  
PL12 24.44 dB  
PL13 24.44 dB  
SFO2 300.1312003 MHz

F2 - Processing parameters  
SI 32768  
SF 75.4677335 MHz  
WDW EM  
SSB 0  
GB 0  
PC 1.40

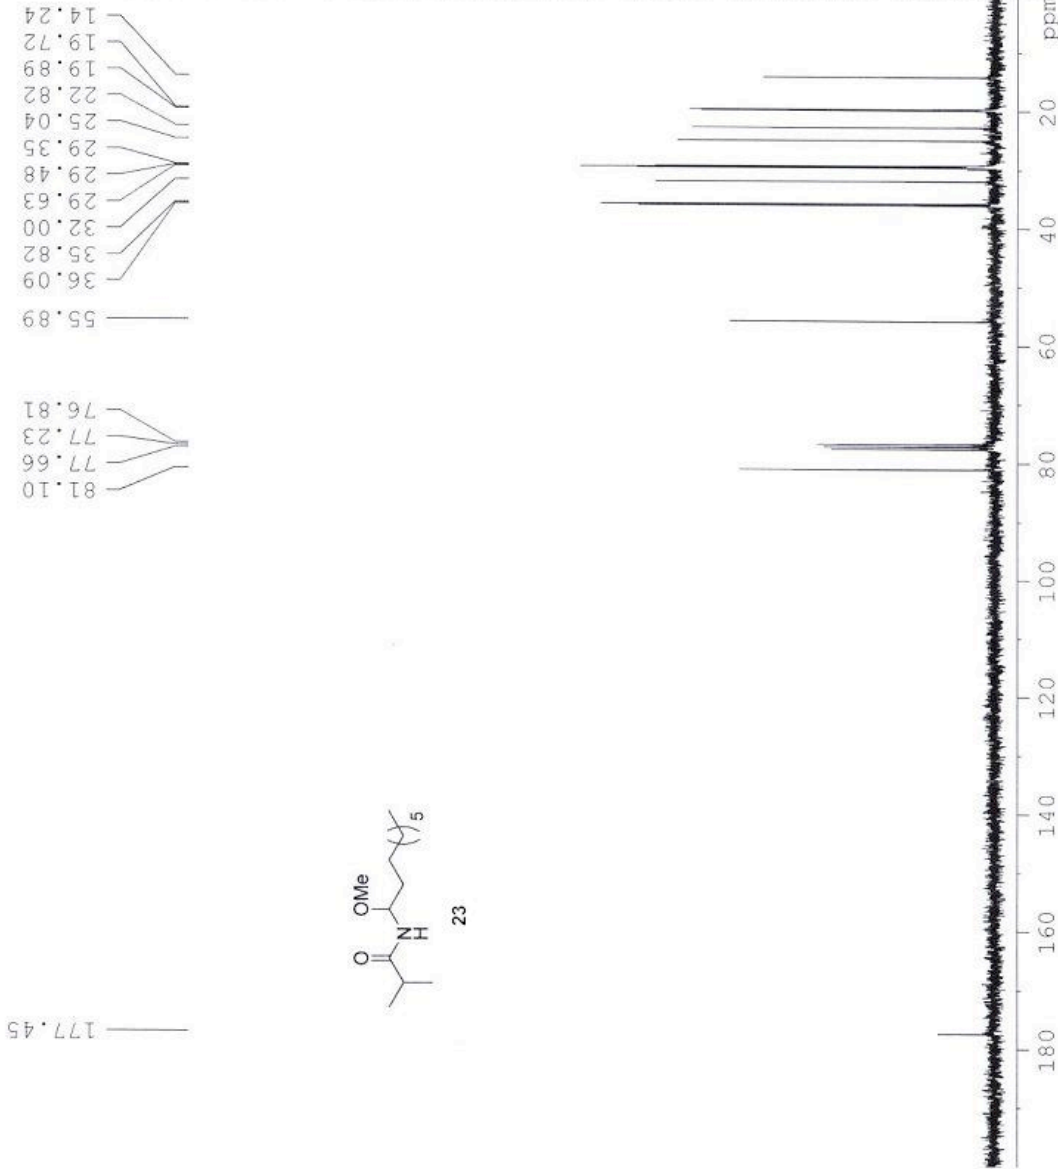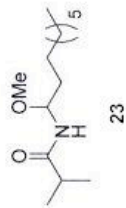

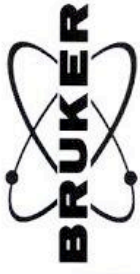

acyl hemiaminal

Current Data Parameters  
 NAME SW02200701  
 EXPNO 1  
 PROCNO 1

F2 - Acquisition Parameters  
 Date\_ 20070220  
 Time 11.33  
 INSTRUM spect  
 PROBHD 5 mm QNP 1H/1  
 PULPROG zg  
 TD 32768  
 SOLVENT CDC13  
 NS 4  
 DS 2  
 SWH 6172.839 Hz  
 FIDRES 0.188380 Hz  
 AQ 2.6542380 sec  
 RG 35.9  
 DW 81.000 usec  
 DE 6.00 usec  
 TE 300.0 K  
 DI 1  
 TD0 1

===== CHANNEL f1 =====  
 NUC1 1H  
 P1 7.00 usec  
 PL1 0.00 dB  
 SFO1 300.0868531 MHz

F2 - Processing parameters  
 SI 16384  
 SF 300.0850010 MHz  
 WDW EM  
 SSB 0  
 LB 0.30 Hz  
 GB 0  
 PC 1.00

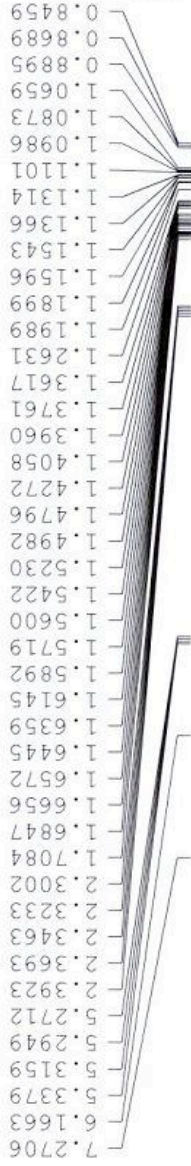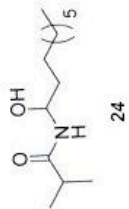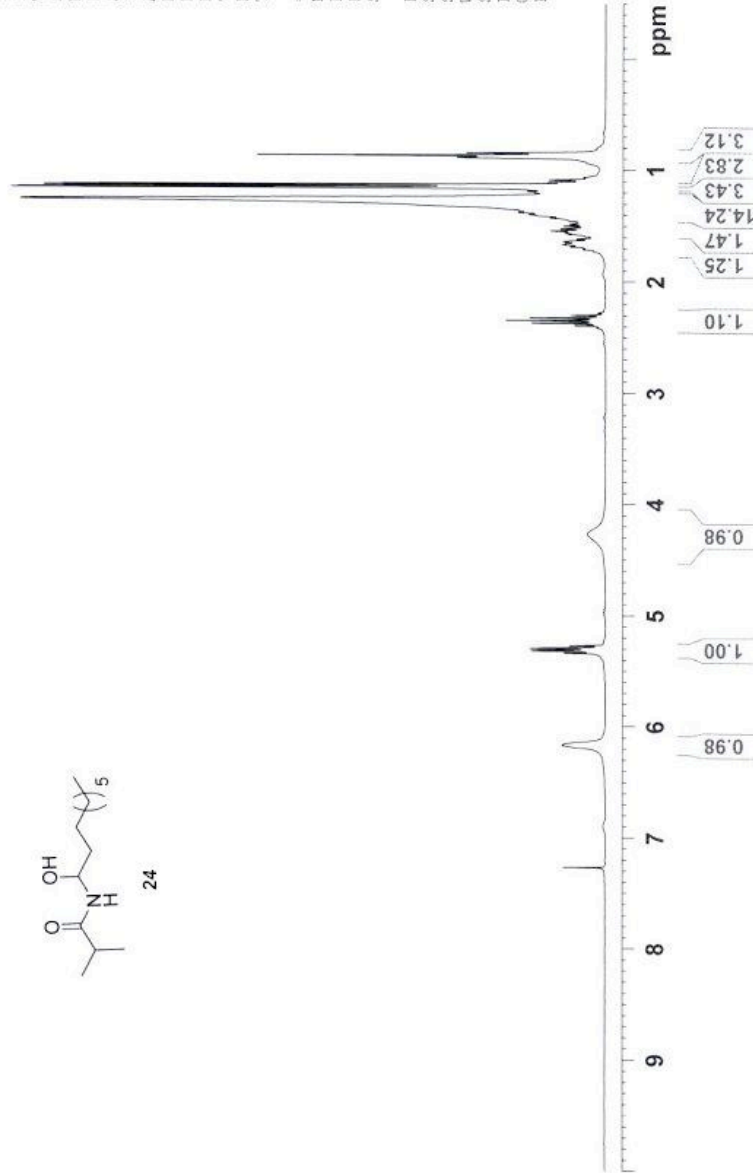

acyl hemiaminal

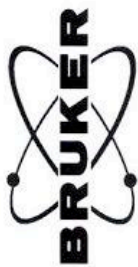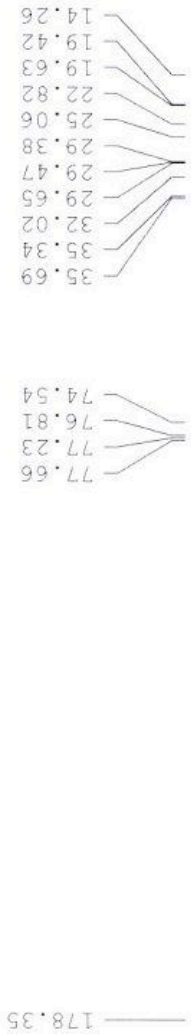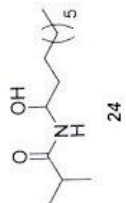

Current Data Parameters  
NAME SW02200702  
EXPNO 1  
PROCNO 1

F2 - Acquisition Parameters  
Date\_ 20070220  
Time\_ 11.39  
INSTRUM spect  
PROBHD 5 mm QNP 1H/1  
PULPROG zgpg  
TD 65536  
SOLVENT CDCl3  
NS 28  
DS 2  
SWH 17985.611 Hz  
FIDRES 0.274439 Hz  
AQ 1.8219508 sec  
RG 13004  
DM 27.800 usec  
DE 6.00 usec  
TE 300.0 K  
D1 10.0000000 sec  
d11 0.0300000 sec  
DELTA 9.8999962 sec  
TD0 1

===== CHANNEL f1 =====  
NUC1 13C  
P1 7.00 usec  
PL1 0.00 dB  
SFO1 75.4639789 MHz

===== CHANNEL f2 =====  
CPDPRG2 waltz16  
NUC2 1H  
PCPD2 100.00 usec  
PL2 0.00 dB  
PL12 18.24 dB  
PL13 18.24 dB  
SFO2 300.0862003 MHz

F2 - Processing parameters  
SI 32768  
SF 75.4564178 MHz  
EM 0  
MDW 0  
SSB 0  
LB 1.00 Hz  
GB 0  
PC 1.40

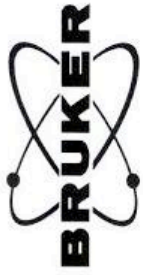

acyl amination from benzonitrile

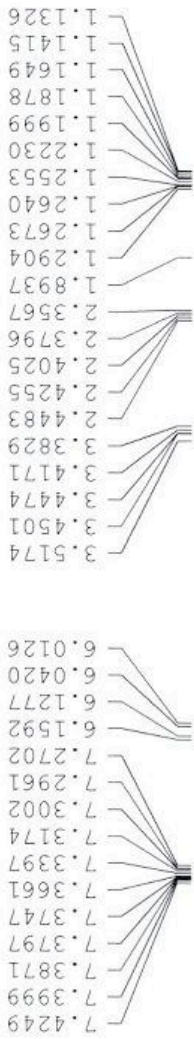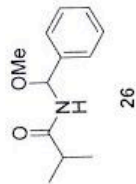

F2 - Acquisition Parameters  
Date\_ 20070525  
Time 17.05  
INSTRUM spect  
PROBHD 5 mm DUL 1H-13  
PULPROG zg  
TD 65536  
SOLVENT CDCl3  
NS 1  
DS 2  
SWH 6218.905 Hz  
FIDRES 0.094893 Hz  
AQ 5.2691445 sec  
RG 57  
DW 80.400 usec  
DE 6.00 usec  
TE 300.0 K  
D1 2.00000000 sec  
TD0 1

==== CHANNEL f1 =====  
NUC1 1H  
P1 9.00 usec  
PL1 1.00 dB  
SF01 300.3818550 MHz  
F2 - Processing parameters  
SI 32768  
SF 300.3799996 MHz  
WDW EM  
SSB 0  
LB 0.30 Hz  
GB 0  
PC 1.00

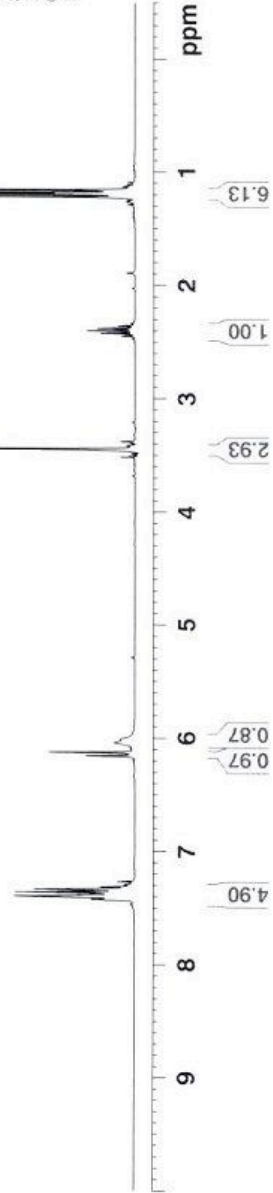

acyl aminal from benzonitrile

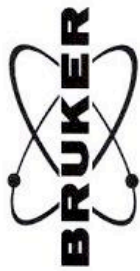

Current Data Parameters  
 NAME SW05250705  
 EXPNO 1  
 PROCNO 1

F2 - Acquisition Parameters  
 Date\_ 20070525  
 Time 17.11  
 INSTRUM spect  
 PROBHD 5 mm DUL 1H-13  
 PULPROG zgpg  
 TD 65536  
 SOLVENT CDCl3  
 NS 16  
 DS 4  
 SWH 18115.941 Hz  
 FIDRES 0.276427 Hz  
 AQ 1.8088436 sec  
 RG 9195.2  
 DW 27.600 usec  
 DE 6.00 usec  
 TE 300.0 K  
 D1 10.00000000 sec  
 d11 0.03000000 sec  
 DELTA 9.89999962 sec  
 TDO 1

==== CHANNEL f1 =====  
 NUC1 13C  
 P1 9.00 usec  
 PL1 1.80 dB  
 SF01 75.5381641 MHz

==== CHANNEL f2 =====  
 CPDPRG2 waitz16  
 NUC2 1H  
 PCPD2 92.00 usec  
 PL2 0.00 dB  
 PL12 20.00 dB  
 PL13 20.00 dB  
 SFO2 300.3812015 MHz

F2 - Processing parameters  
 SI 65536  
 SF 75.5305983 MHz  
 WDW EM  
 SSB 0  
 LB 0  
 GB 0  
 PC 1.40

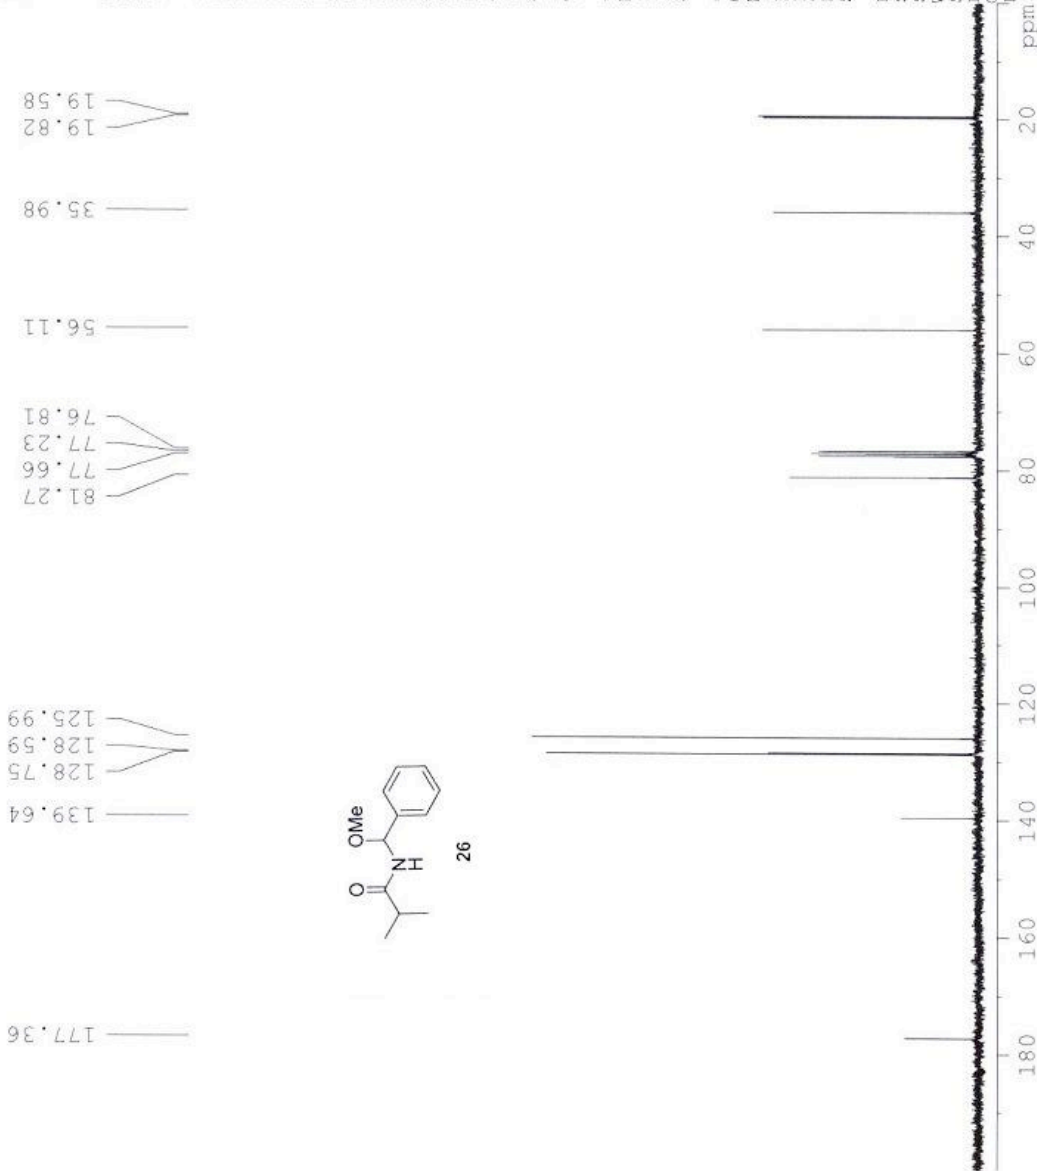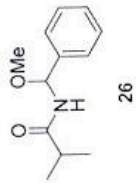



20.20  
20.86  
26.46  
35.60

52.28  
59.86

85.83

116.47

136.00

212.98

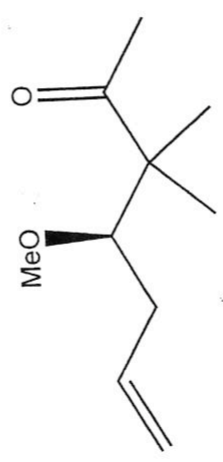



1.439  
1.478  
1.516  
1.553  
1.610  
1.620  
1.658  
1.694  
1.704  
1.957  
1.972  
2.002  
2.017  
2.056  
2.070  
2.136  
2.864  
2.877  
2.903  
2.916  
3.121  
3.135  
3.160  
3.174  
3.214  
3.233  
3.253  
3.312  
3.624  
3.645  
3.666  
3.687  
5.588  
5.620  
6.160

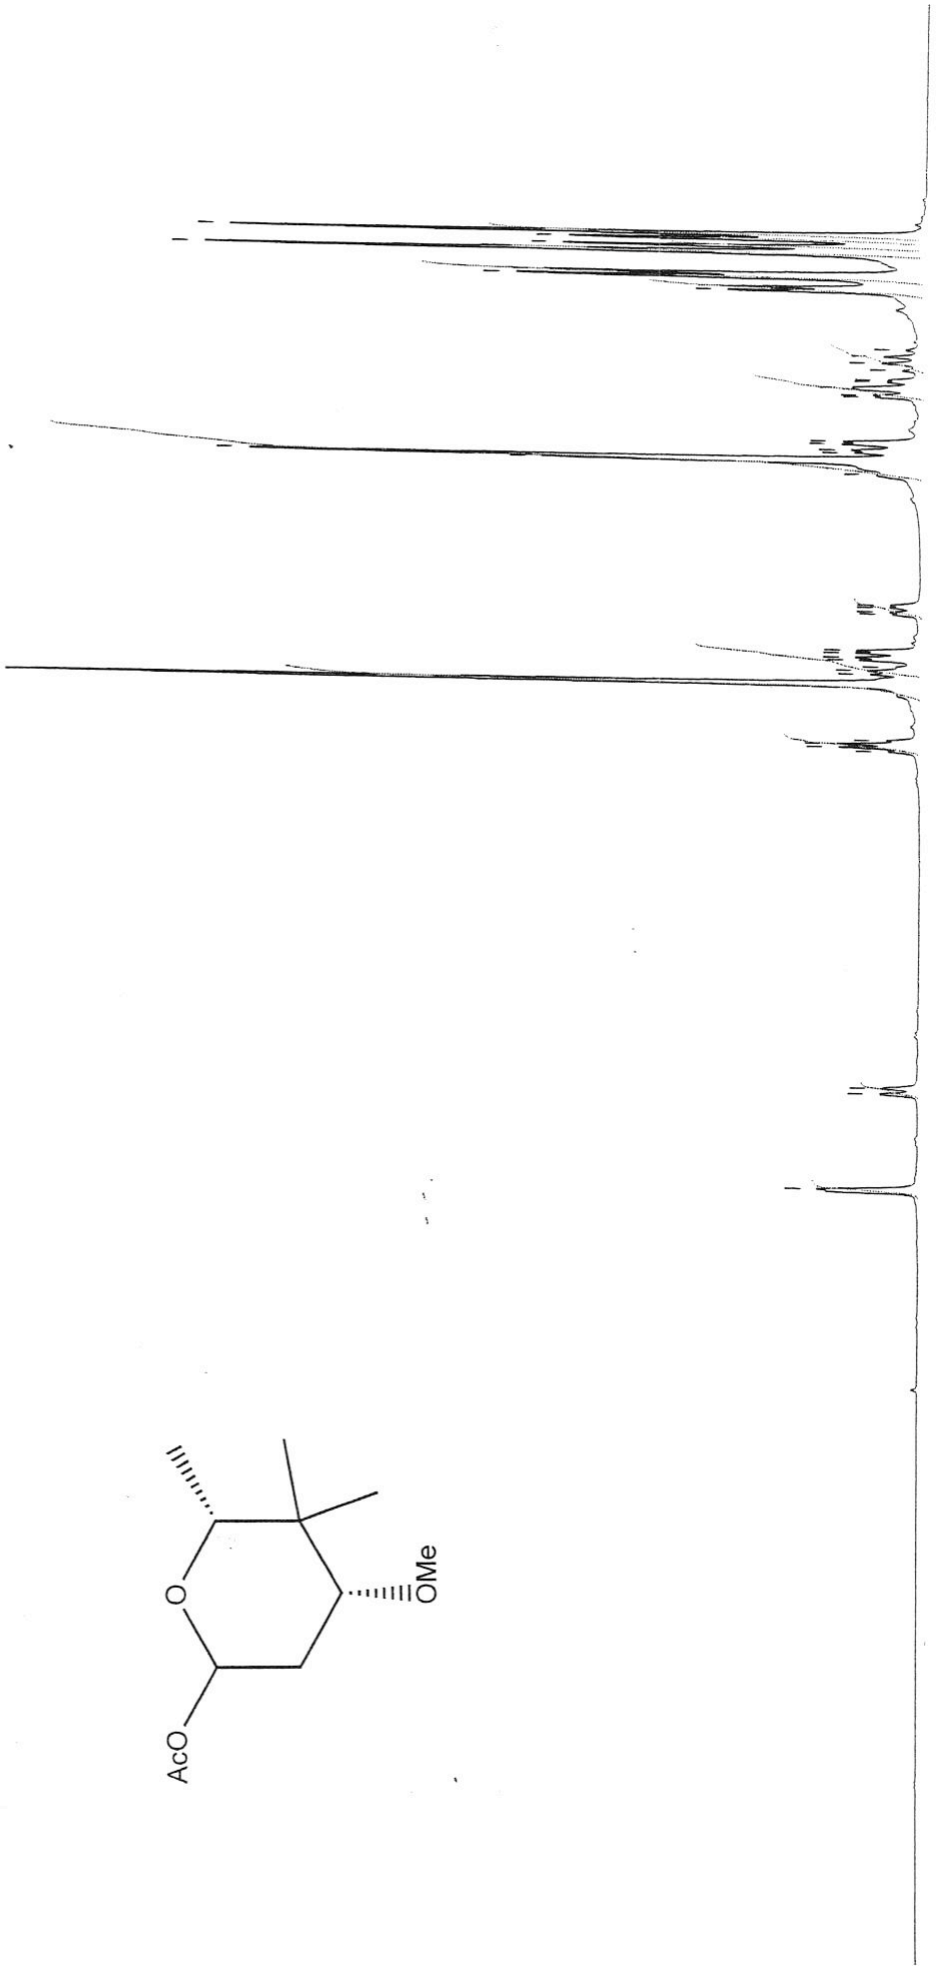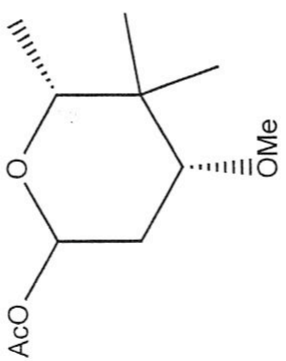

11.55  
12.30  
14.21  
14.27  
14.77  
19.23  
21.04  
21.12  
22.17  
22.38  
22.48  
29.44  
29.86  
31.27  
38.21  
38.45  
38.70

57.22  
57.24  
57.36

73.96  
74.33  
76.58  
77.00  
77.31  
77.43  
80.04  
83.21  
84.18  
92.34  
92.72  
92.94

169.16  
169.56

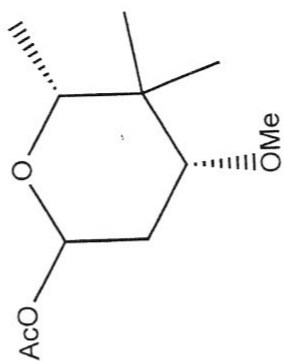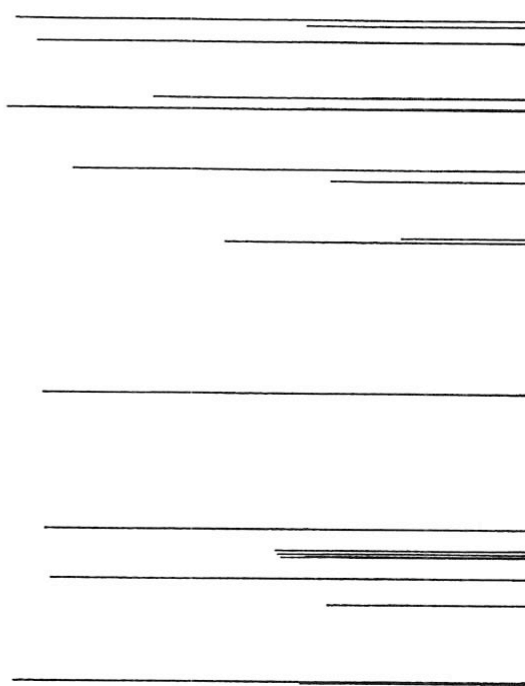

pyranyl cyanide

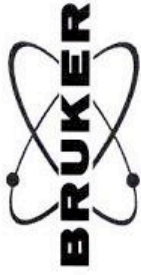

Current Data Parameters  
NAME SW06130701  
EXPNO 1  
PROCNO 1

F2 - Acquisition Parameters  
Date\_ 20070613  
Time\_ 11:27  
INSTRUM spect  
PROBHD 5 mm QNP 1H/1  
PULPROG zg  
TD 32768  
SOLVENT CDCl3  
NS 1  
DS 2  
SWH 6172.839 Hz  
FIDRES 0.168380 Hz  
AQ 2.6542580 sec  
RG 35.9  
DW 81.000 usec  
DE 6.00 usec  
TE 300.0 K  
D1 1.0000000 sec  
TDO 1

===== CHANNEL f1 =====  
NUC1 1H  
P1 7.00 usec  
PL1 0.00 dB  
SFO1 300.0868531 MHz

F2 - Processing parameters  
SI 16384  
SF 300.0850014 MHz  
WDW EM  
SSB 0  
LB 0.30 Hz  
GB 0  
PC 1.00

4.9134  
4.9095  
4.8934  
4.8894  
3.653  
3.6442  
3.6231  
3.6021  
3.3728  
3.1948  
3.1798  
3.1557  
3.1407  
2.0912  
2.0864  
2.0761  
2.0714  
2.0462  
2.0414  
2.0312  
2.0264  
1.8864  
1.8662  
1.8472  
1.8416  
1.8270  
1.8215  
1.8025  
1.7821

7.2710

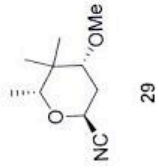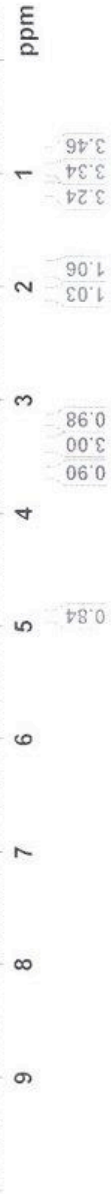

pyranyl cyanide

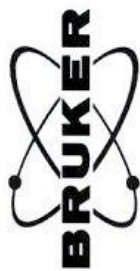

Current Data Parameters  
NAME SW06130702  
EXPNO 1  
PROCNO 1

F2 - Acquisition Parameters  
Date\_ 20070613  
Time 11.41  
INSTRUM spect  
PROBHD 5 mm DUL 1H-13  
PULPROG zgpg  
TD 65536  
SOLVENT CDCl3  
NS 17  
DS 4  
SWH 18115.941 Hz  
FIDRES 0.276427 Hz  
AQ 1.8088436 sec  
RG 9195.2  
DW 27.600 usec  
DE 6.00 usec  
TE 300.0 K  
D1 10.00000000 sec  
d11 0.03000000 sec  
DELTA 9.89999962 sec  
TDO 1

==== CHANNEL f1 =====  
NUC1 13C  
P1 9.00 usec  
PL1 1.80 dB  
SFO1 75.5381641 MHz

==== CHANNEL f2 =====  
CPDPRG2 waitz16  
NUC2 1H  
PCPD2 92.00 usec  
PL2 0.00 dB  
PL12 20.00 dB  
PL13 20.00 dB  
SFO2 300.3812015 MHz

F2 - Processing parameters  
SI 65536  
SF 75.5305982 MHz  
WDW EM  
SSB 0  
LB 0  
GB 0  
PC 1.40

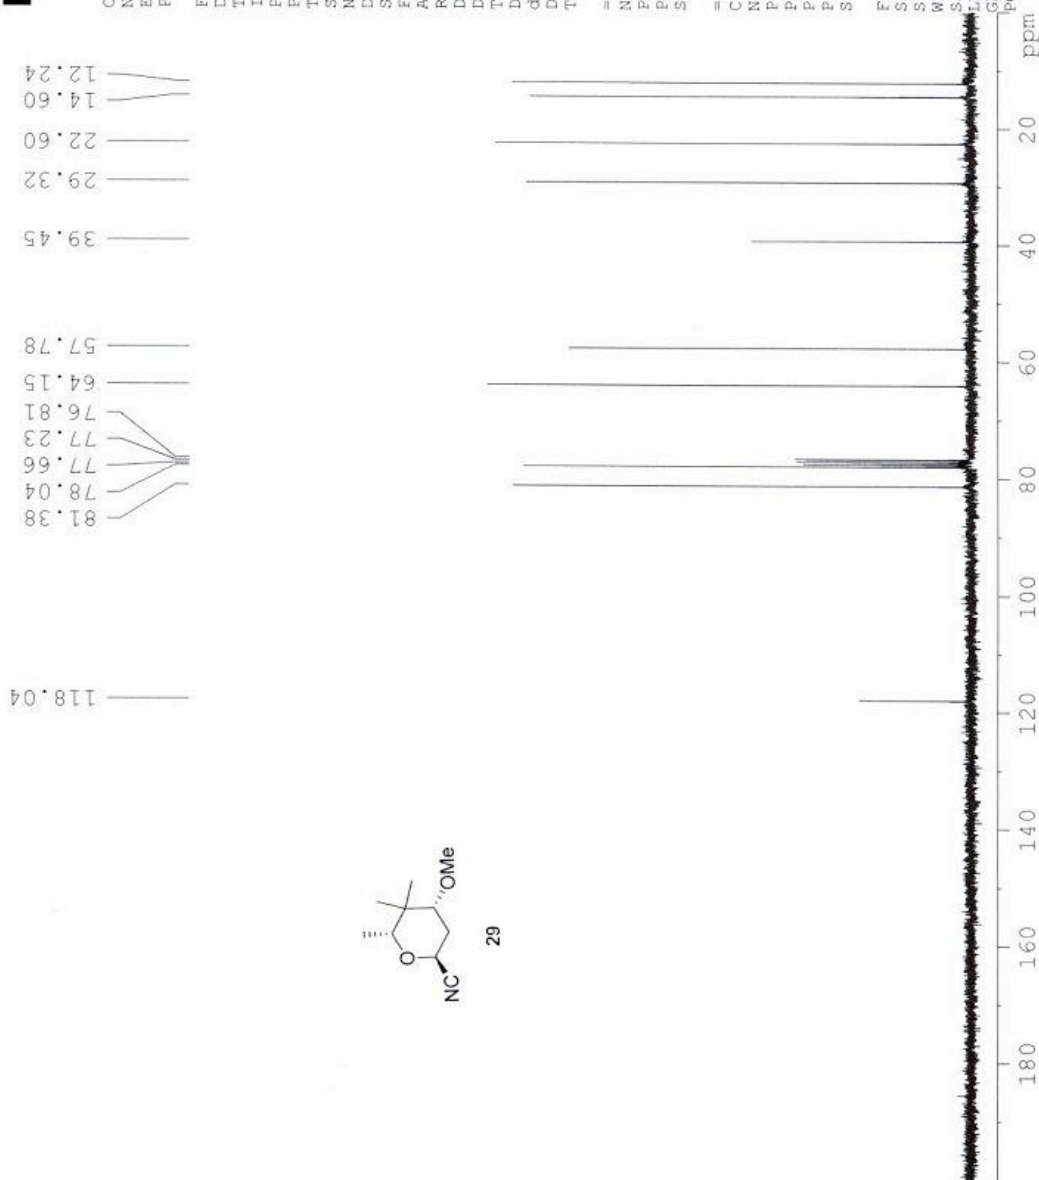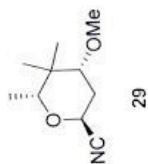

desired pdt from pyranyl cyanide

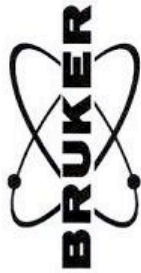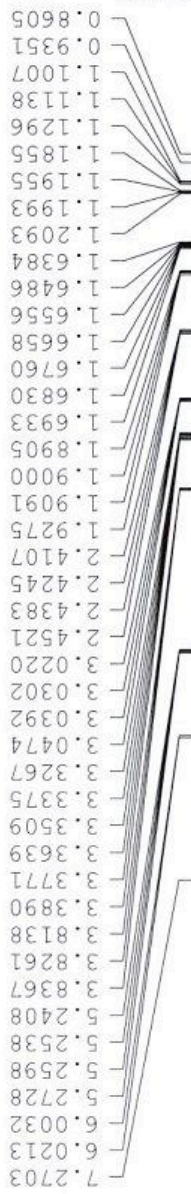

F2 - Acquisition Parameters  
Date\_ 20070513  
Time\_ 15.03  
INSTRUM spect  
PROBHD 5 mm Multinucl  
PULPROG zg  
TD 65536  
SOLVENT CDCl3  
NS 4  
DS 2  
SWH 10330.578 Hz  
FIDRES 0.157632 Hz  
AQ 3.1719923 sec  
RG 12.7  
DW 48.400 usec  
DE 6.00 usec  
TE 298.2 K  
D1 2.0000000 sec  
TDO 1

==== CHANNEL f1 =====  
NUC1 1H  
P1 9.00 usec  
PL1 0.00 dB  
SFO1 500.1330885 MHz

F2 - Processing parameters  
SI 32768  
SF 500.1300079 MHz  
WDW EM  
SSB 0  
LB 0  
GB 0  
PC 1.00

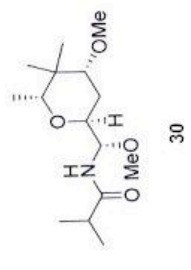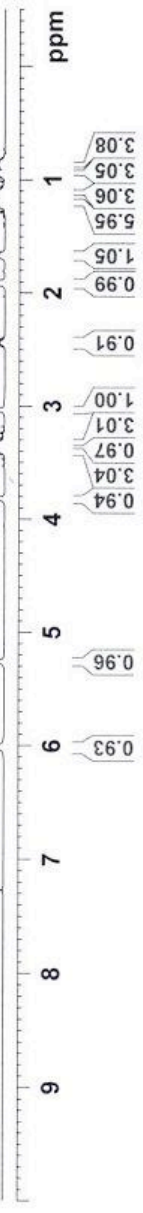

desired pdt from pyranyl cyanide

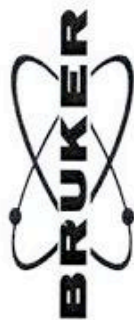

Current Data Parameters  
 NAME SW05140702  
 EXPNO 1  
 PROCNO 1

F2 - Acquisition Parameters  
 Date\_ 20070514  
 Time 16.03  
 INSTRUM spect  
 PROBHD 5 mm Multinucl  
 PULPROG zgpg  
 TD 65536  
 SOLVENT CDC13  
 NS 156  
 DS 2  
 SWH 30030.029 Hz  
 FIDRES 0.458222 Hz  
 AQ 1.0912244 sec  
 RG 2896.3  
 DW 16.650 usec  
 DE 6.00 usec  
 TE 298.2 K  
 D1 6.00000000 sec  
 d11 0.03000000 sec  
 DELTA 5.90000010 sec  
 TD0 1

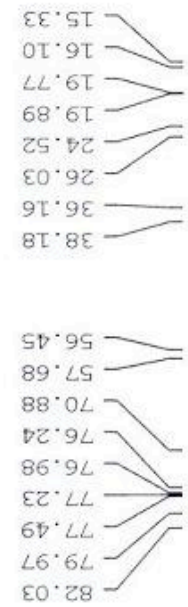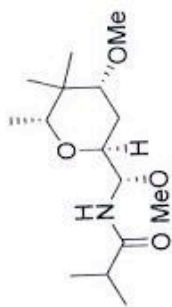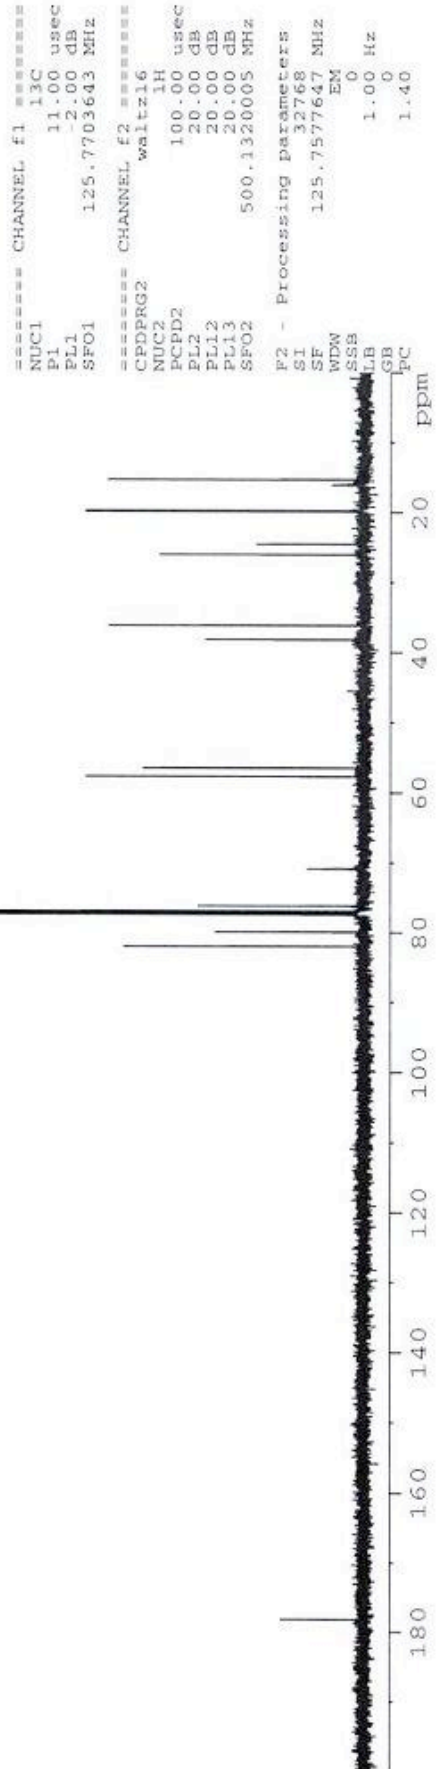



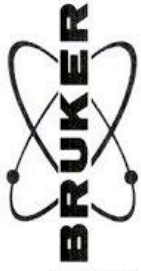

spot\_2

7.2694  
6.2844  
6.2535  
5.1839  
5.1711  
5.1519  
5.1390  
3.8320  
3.8166  
3.7961  
3.6814  
3.6590  
3.4025  
3.3810  
3.3399  
3.3316  
3.3111  
3.1907  
3.1779  
3.1673  
3.1543  
2.4455  
2.4224  
2.3995  
1.9590  
1.9458  
1.9369  
1.9238  
1.7083  
1.6916  
1.6852  
1.6643  
1.6295  
1.2562  
1.2160  
1.2093  
1.1933  
1.1714  
1.1444  
1.1405  
1.1347  
0.9967  
0.9482  
0.8829

Current Data Parameters  
NAME SW05090704  
EXPNO 1  
PROCNO 1

F2 - Acquisition Parameters  
Date\_ 20070509  
Time\_ 17.25  
INSTRUM spect  
PROBHD 5 mm DUL LH-13  
PULPROG zg  
TD 65536  
SOLVENT CDCl3  
NS 11  
DS 2  
SWH 6218.905 Hz  
FIDRES 0.094893 Hz  
AQ 5.2691445 sec  
RG 161.3  
DW 80.400 usec  
DE 6.00 usec  
TE 300.0 K  
O1 2.00000000 sec  
TDO 1

==== CHANNEL f1 =====  
NUC1 1H  
P1 9.00 usec  
PL1 1.00 dB  
SFO1 300.3818550 MHz

F2 - Processing parameters  
SI 32768  
SF 300.3800000 MHz  
WDW EM  
SSB 0  
LB 0.30 Hz  
GB 0  
PC 1.00

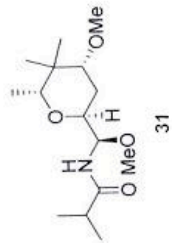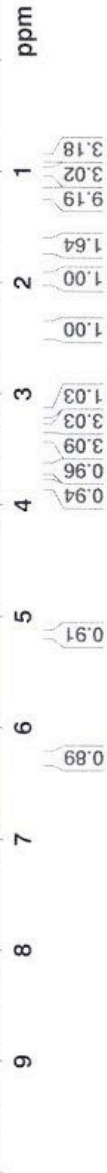



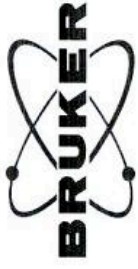

Current Data Parameters  
NAME SW05090705  
EXPNO 1  
PROCNO 1

F2 - Acquisition Parameters  
Date\_ 20070509  
Time 17.33  
INSTRUM spect  
PROBHD 5 mm DUL 1H-13  
PULPROG zgpg  
TD 65536  
SOLVENT CDCl3  
NS 137  
DS 4  
SWH 18115.941 Hz  
FIDRES 0.276427 Hz  
AQ 1.8088436 sec  
RG 13004  
DW 27.600 usec  
DE 6.00 usec  
TE 300.0 K  
d1 10.00000000 sec  
d11 0.03000000 sec  
DELTA 9.8999962 sec  
TDO 1

===== CHANNEL f1 =====  
NUC1 13C  
P1 9.00 usec  
PL1 1.80 dB  
SFO1 75.5381641 MHz

===== CHANNEL f2 =====  
CPDPRG2 waltz16  
NUC2 1H  
PCPD2 92.00 usec  
PL2 0.00 dB  
PL12 20.00 dB  
PL13 20.00 dB  
SFO2 300.3812015 MHz

F2 - Processing parameters  
SI 65536  
SF 75.5305942 MHz  
WDW EM  
SSB 0  
LB 0  
GB 0  
FC 1.40

spot 2

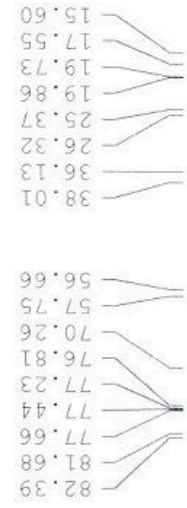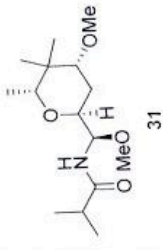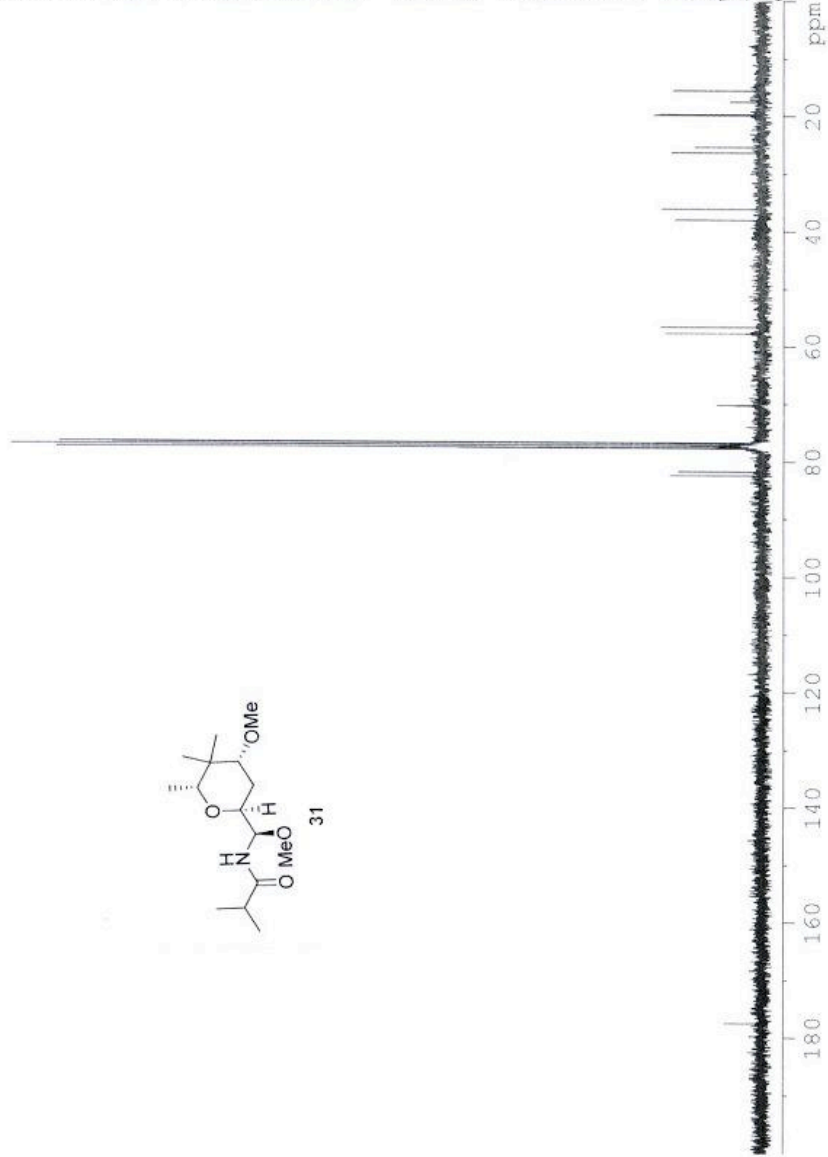

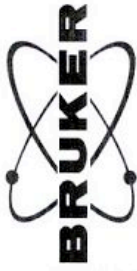

spot 3

7.2699  
5.7665  
4.0323  
4.0140  
4.0050  
3.9866  
3.4782  
3.4564  
3.4349  
3.4280  
3.4205  
3.4079  
3.3913  
3.3606  
3.3556  
3.3155  
3.2987  
3.2521  
3.0531  
3.0316  
3.0088  
2.4272  
2.4042  
2.3812  
2.3583  
2.3353  
1.7459  
1.7265  
1.7226  
1.7058  
1.6866  
1.2553  
1.2249  
1.1799  
1.1575  
1.1365  
1.1152  
1.0923  
1.0731  
1.0253  
0.9566  
0.9243  
0.8806  
0.8165

Current Data Parameters  
NAME SW05090706  
EXPNO 1  
PROCNO 1

F2 - Acquisition Parameters  
Date\_ 20070509  
Time 21.27  
INSTRUM spect  
PROBHD 5 mm DUL 1H-13  
PULPROG zg  
TD 65536  
SOLVENT CDCl3  
NS 5  
DS 2  
SWH 6218.905 Hz  
FIDRES 0.094893 Hz  
AQ 5.2691445 sec  
RG 161.3  
DW 80.400 usec  
DE 6.00 usec  
TE 300.0 K  
D1 2.00000000 sec  
TDO 1

===== CHANNEL f1 =====  
NUC1 1H  
P1 9.00 usec  
PL1 1.00 dB  
SFO1 300.3818550 MHz

F2 - Processing parameters  
SI 32768  
SF 300.3799993 MHz  
WDW EM  
SSB 0  
LB 0.30 Hz  
GB 0  
PC 1.00

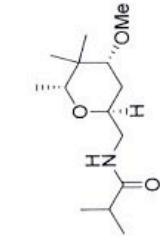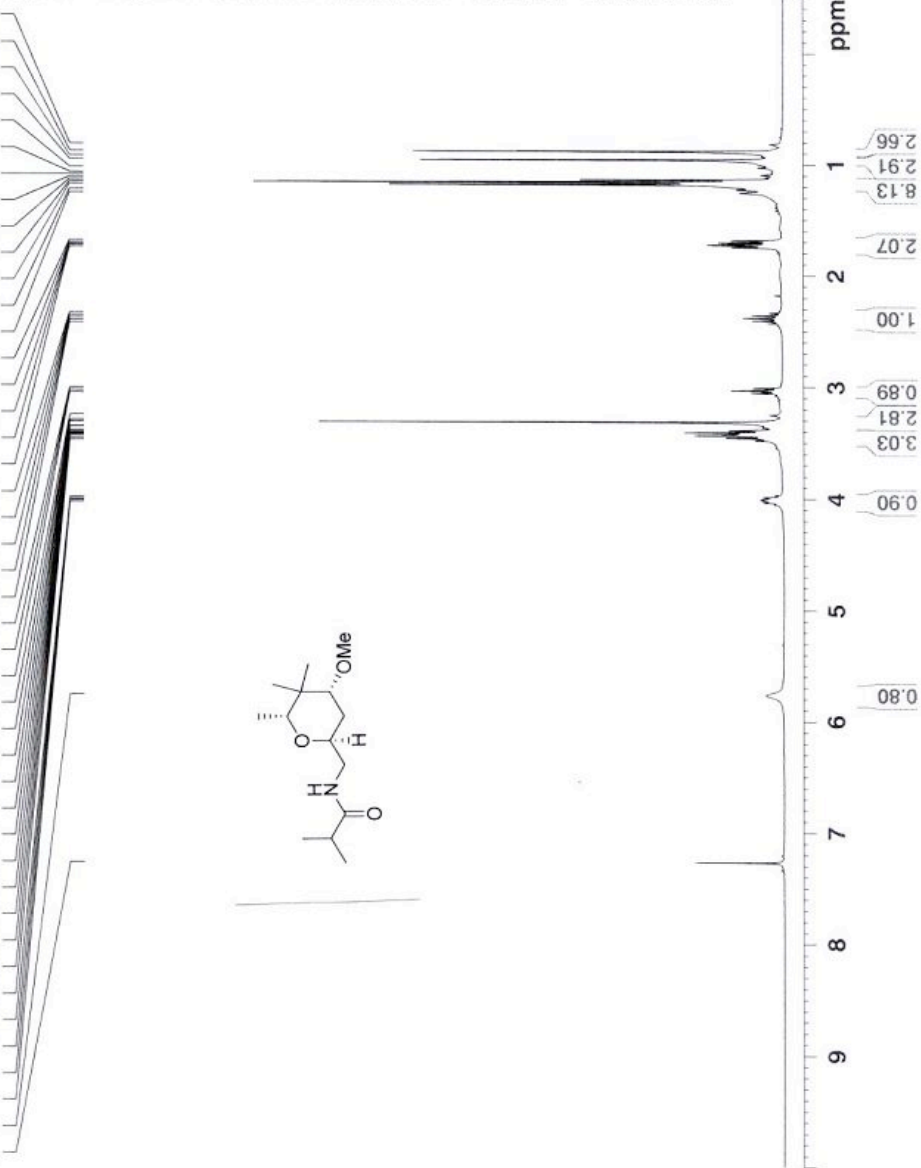

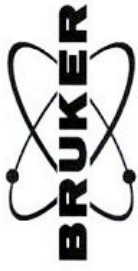

Current Data Parameters  
NAME SW05110702  
EXPNO 1  
PROCNO 1

F2 - Acquisition Parameters  
Date\_ 20070511  
Time 16.07  
INSTRUM spect  
PROBHD 5 mm QNP 1H/1  
PULPROG zgpg  
TD 65536  
SOLVENT CDCl3  
NS 230  
DS 2  
SWH 17985.611 Hz  
FIDRES 0.274439 Hz  
AQ 1.8219508 sec  
RG 13004  
DW 27.800 usec  
DE 6.00 usec  
TE 300.0 K  
D1 10.0000000 sec  
d11 0.0300000 sec  
DELTA 9.8999962 sec  
TD0 1

==== CHANNEL f1 =====  
NUC1 13C  
P1 7.00 usec  
PL1 0.00 dB  
SFO1 75.4639789 MHz

==== CHANNEL f2 =====  
CPDPRG2 waltz16  
NUC2 1H  
PCPD2 100.00 usec  
PL2 0.00 dB  
PL12 18.24 dB  
PL13 18.24 dB  
SFO2 300.0862003 MHz

F2 - Processing parameters  
SI 32768  
SF 75.4564163 MHz  
WDW EM  
SSB 0  
LB 1.00 Hz  
GB 0  
PC 1.40

spot 3

82.01  
77.66  
77.23  
76.81  
74.52  
69.02  
57.70  
40.96  
38.60  
35.89  
27.62  
24.48  
19.90  
19.83  
19.62  
15.46

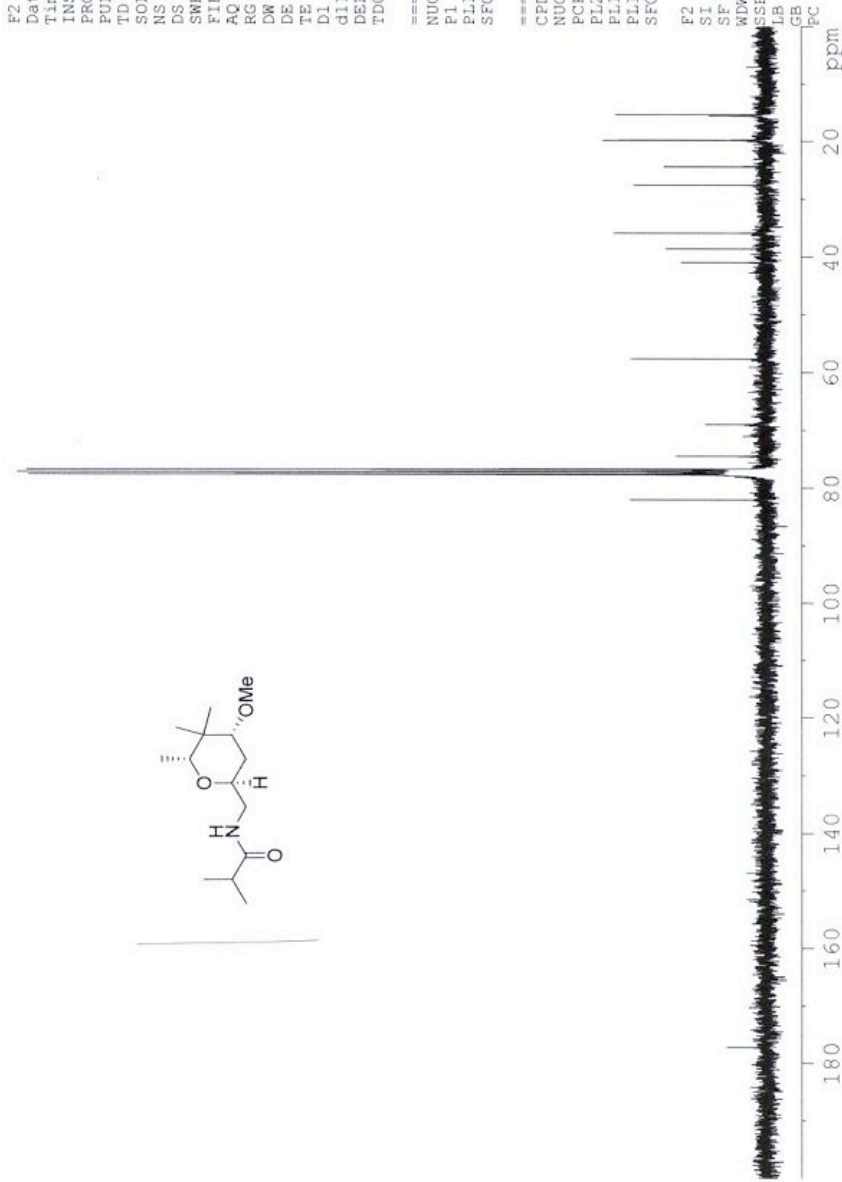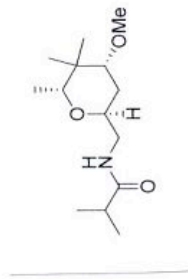

Supplement: NIHMS62967-supplement-1File003.pdf [file NIHMS62967-supplement-1File003.pdf]
